# Supplementary material for: Carboxylate-assisted ruthenium(ii)-catalyzed C–H activations of monodentate amides with conjugated alkenes
Source: Royal Society of Chemistry journal article supplement (doi:10.1039/c5qo00167f), 2015-01-01

**Carboxylate-Assisted Ruthenium(II)-Catalyzed C–H Activations  
of Monodentate Amides with Alkenes**

*Jie Li, and Lutz Ackermann\**

## **Contents**

|                                                |      |
|------------------------------------------------|------|
| General Remarks                                | S-2  |
| Representative Procedures                      | S-3  |
| Characterization Data of <b>3</b> and <b>5</b> | S-3  |
| Competition Experiments                        | S-14 |
| H/D Exchange Experiments                       | S-15 |
| KIE Experiments                                | S-16 |
| Characterization Data of Products <b>6</b>     | S-18 |
| References                                     | S-21 |
| NMR Spectra                                    | S-22 |

## General Remarks

Catalytic reactions were carried out in Schlenk tubes under an argon atmosphere using pre-dried glassware. 1,4-Dioxane was dried and distilled over Na under nitrogen. The following starting materials were synthesized according to previously described methods: Aryl amides **1a-1r**, [D<sub>5</sub>]-**1a**,<sup>[1]</sup> acetanilides **4**,<sup>[2]</sup> alkenes **2b**.<sup>[3]</sup> Other chemicals were obtained from commercial sources and were used without further purification. Yields refer to isolated compounds, estimated to be > 95% pure as determined by <sup>1</sup>H-NMR and GC-analysis. Chromatography: Merck silica gel 60 (40-63 μm). NMR: Spectra were recorded on Varian Unity 300, Mercury 300 or Inova 500 in the solvent indicated; chemical shifts (δ) are given in ppm. All IR spectra were recorded on a Bruker FT-IR Alpha device. MS: EI-MS-spectra were recorded with Finnigan MAT 95, 70 eV; High resolution mass spectrometry (HRMS) with APEX IV 7T FTICR, Bruker Daltonic. M. p.: Stuart melting point apparatus SMP3, Barlworld Scientific, values are uncorrected.

## Representative Procedure

**Representative Procedure A:** A suspension of aryl amide **1** or acetanilide **4** (0.5 mmol, 1.0 equiv),  $\alpha,\beta$ -unsaturated ketone **2** (1.0 mmol, 2.0 equiv),  $[\text{RuCl}_2(p\text{-cymene})]_2$  (15.3 mg, 5.0 mol %),  $\text{KO}_2\text{CMes}$  (30.3 mg, 30 mol %) and  $\text{MesCO}_2\text{H}$  (82 mg, 0.5 mmol, 1.0 equiv) in degassed  $\text{H}_2\text{O}$  (2.0 mL) was stirred at 120 °C for 20 h under an atmosphere of  $\text{N}_2$ . At ambient temperature, aq.  $\text{NaCl}$  (15 mL) was added. The reaction mixture was extracted with  $\text{EtOAc}$  ( $3 \times 20$  mL), and the combined organic layers were dried over  $\text{Na}_2\text{SO}_4$ . Evaporation of the solvents *in vacuo* and purification of the remaining residue by column chromatography on silica gel (*n*-hexane/ $\text{EtOAc}$ ) yielded products **3**.

**Representative Procedure B:** A suspension of acetanilides **4** (0.5 mmol, 1.0 equiv),  $\alpha,\beta$ -unsaturated ketone **2** (1.0 mmol, 2.0 equiv),  $[\text{RuCl}_2(p\text{-cymene})]_2$  (7.7 mg, 2.5 mol %),  $\text{AgSbF}_6$  (17.2 mg, 20 mol %) and  $\text{Cu}(\text{OAc})_2$  (190 mg, 2.1 equiv) in 1,4-dioxane (2.0 mL) was stirred at 140 °C for 20 h under an atmosphere of  $\text{N}_2$ . At ambient temperature,  $\text{H}_2\text{O}$  (15 mL) was added. The reaction mixture was extracted with  $\text{EtOAc}$  ( $3 \times 20$  mL) and the combined organic phase was washed with brine (20 mL) and dried over  $\text{Na}_2\text{SO}_4$ . Evaporation of the solvents *in vacuo* and purification of the remaining residue by column chromatography on silica gel (*n*-hexane/ $\text{EtOAc}$ ) yielded products **6**.

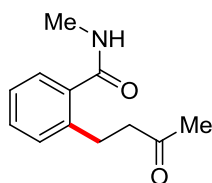

### ***N*-Methyl-2-(3-oxobutyl)benzamide (3aa)**

The general procedure **A** was followed using **1a** (68 mg, 0.5 mmol) and methyl vinyl ketone (**2a**) (70 mg, 1.0 mmol) for 20 h. Purification by column chromatography (*n*-hexane/ $\text{EtOAc}$  1:1→1:2) yielded **3aa** (82 mg, 80%) as a colorless solid. M. p. = 117–119 °C.  $^1\text{H-NMR}$  ( $\text{CDCl}_3$ , 300 MHz):  $\delta$  = 7.36 – 7.27 (m, 2H), 7.21 – 7.13 (m, 2H), 6.36 (br s, 1H), 2.96 (d,  $J$  = 4.9 Hz, 3H), 2.93 (t,  $J$  = 6.0 Hz, 2H), 2.87 (t,  $J$  = 6.0 Hz, 2H), 2.10 (s, 3H).  $^{13}\text{C-NMR}$  ( $\text{CDCl}_3$ , 75MHz):  $\delta$  = 208.6 ( $\text{C}_q$ ), 170.6 ( $\text{C}_q$ ), 138.9 ( $\text{C}_q$ ), 136.7 ( $\text{C}_q$ ), 129.9 (CH), 129.7 (CH), 127.2 (CH), 126.2 (CH), 45.2 ( $\text{CH}_2$ ), 30.0 ( $\text{CH}_3$ ), 27.2 ( $\text{CH}_2$ ), 26.6 ( $\text{CH}_3$ ). IR (ATR): 3290, 1707,

1631, 1368, 1166, 661  $\text{cm}^{-1}$ . MS (EI)  $m/z$  (relative intensity) 205 (10) [ $\text{M}^+$ ], 175 (10), 162 (100), 144 (10), 131 (45), 103 (5). HR-MS (ESI)  $m/z$  calcd for  $\text{C}_{12}\text{H}_{16}\text{NO}_2$  [ $\text{M}+\text{H}^+$ ] 206.1181, found 206.1177.

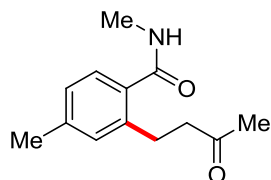

#### ***N*,4-Dimethyl-2-(3-oxobutyl)benzamide (3ba)**

The general procedure **A** was followed using **1b** (75 mg, 0.5 mmol) and methyl vinyl ketone (**2a**) (70 mg, 1.0 mmol) for 20 h. Purification by column chromatography (*n*-hexane/EtOAc 2:1→1:1) yielded **3ba** (77 mg, 70%) as a colorless solid. M. p. = 108–109 °C.  $^1\text{H-NMR}$  ( $\text{CDCl}_3$ , 300 MHz):  $\delta$  = 7.24 (dd,  $J$  = 7.1, 1.4 Hz, 1H), 7.00 (s, 1H), 6.99 (d,  $J$  = 7.1 Hz, 1H), 6.26 (br s, 1H), 2.96 (d,  $J$  = 4.9 Hz, 3H), 2.90 (t,  $J$  = 6.0 Hz, 2H), 2.89 (t,  $J$  = 6.0 Hz, 2H), 2.30 (s, 3H), 2.11 (s, 3H).  $^{13}\text{C-NMR}$  ( $\text{CDCl}_3$ , 125 MHz):  $\delta$  = 208.5 ( $\text{C}_q$ ), 170.5 ( $\text{C}_q$ ), 139.9 ( $\text{C}_q$ ), 139.0 ( $\text{C}_q$ ), 133.6 ( $\text{C}_q$ ), 130.5 (CH), 127.1 (CH), 126.8 (CH), 45.4 ( $\text{CH}_2$ ), 30.0 ( $\text{CH}_3$ ), 27.3 ( $\text{CH}_2$ ), 26.7 ( $\text{CH}_3$ ), 21.3 ( $\text{CH}_3$ ). IR (ATR): 3287, 1710, 1632, 1542, 1164, 693  $\text{cm}^{-1}$ . MS (EI)  $m/z$  (relative intensity) 219 (10) [ $\text{M}^+$ ], 189 (5), 176 (100), 161 (10), 145 (45), 115 (15). HR-MS (EI)  $m/z$  calcd for  $\text{C}_{13}\text{H}_{17}\text{NO}_2$  [ $\text{M}^+$ ] 219.1259, found 219.1256.

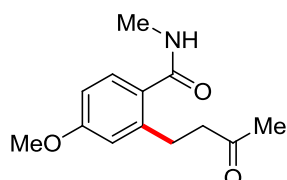

#### **4-Methoxy-*N*-methyl-2-(3-oxobutyl)benzamide (3ca)**

The general procedure **A** was followed using **1c** (83 mg, 0.5 mmol) and methyl vinyl ketone (**2a**) (70 mg, 1.0 mmol) for 20 h. Purification by column chromatography (*n*-hexane/EtOAc 1:1→1:2) yielded **3ca** (94 mg, 80%) as a colorless solid. M. p. = 107–109 °C.  $^1\text{H-NMR}$  ( $\text{CDCl}_3$ , 300 MHz):  $\delta$  = 7.29 (dd,  $J$  = 8.1, 0.8 Hz, 1H), 6.70 (s, 1H), 6.66 (d,  $J$  = 8.1 Hz, 1H), 6.34 (br s, 1H), 3.76 (s, 3H), 2.93 (d,  $J$  = 5.1 Hz, 3H), 2.93 (t,  $J$  = 6.4 Hz, 2H), 2.86 (t,  $J$  = 6.4 Hz, 2H), 2.10 (s, 3H).  $^{13}\text{C-NMR}$  ( $\text{CDCl}_3$ , 75 MHz):  $\delta$  = 208.6 ( $\text{C}_q$ ), 170.3 ( $\text{C}_q$ ), 160.6 ( $\text{C}_q$ ), 141.4 ( $\text{C}_q$ ), 128.9 ( $\text{C}_q$ ), 128.9 (CH), 115.4 (CH), 111.2 (CH), 55.2 ( $\text{CH}_3$ ), 45.2 ( $\text{CH}_2$ ), 29.9 ( $\text{CH}_3$ ), 27.5 ( $\text{CH}_2$ ), 26.6 ( $\text{CH}_3$ ). IR (ATR): 3288, 1705, 1543, 1247, 1157, 696  $\text{cm}^{-1}$ . MS (EI)  $m/z$  (relative intensity) 235 (15) [ $\text{M}^+$ ], 205 (10), 192 (100), 177 (5), 161 (60), 135 (10). HR-MS (EI)  $m/z$  calcd for  $\text{C}_{13}\text{H}_{17}\text{NO}_3$  [ $\text{M}^+$ ] 235.1208, found 235.1206.

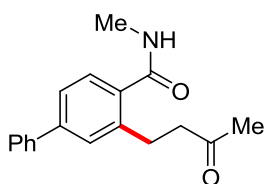

### ***N*-Methyl-3-(3-oxobutyl)-[1,1'-biphenyl]-4-carboxamide (3da)**

The general procedure **A** was followed using **1d** (106 mg, 0.5 mmol) and methyl vinyl ketone (**2a**) (70 mg, 1.0 mmol) for 20 h. Purification by column chromatography (*n*-hexane/EtOAc 1:1→1:2) yielded **3da** (111 mg, 79%) as a colorless solid. M. p. = 153–155 °C. <sup>1</sup>H-NMR (CDCl<sub>3</sub>, 300 MHz): δ = 7.60 – 7.48 (m, 2H), 7.48 – 7.38 (m, 5H), 7.38 – 7.28 (m, 1H), 6.42 (br s, 1H), 3.10 – 3.00 (m, 2H), 2.98 (d, *J* = 4.9 Hz, 3H), 2.96 – 2.83 (m, 2H), 2.12 (s, 3H). <sup>13</sup>C-NMR (CDCl<sub>3</sub>, 75 MHz): δ = 208.5 (C<sub>q</sub>), 170.4 (C<sub>q</sub>), 142.8 (C<sub>q</sub>), 140.1 (C<sub>q</sub>), 139.6 (C<sub>q</sub>), 135.3 (C<sub>q</sub>), 128.8 (CH), 128.6 (CH), 127.7 (CH), 127.7 (CH), 127.1 (CH), 124.9 (CH), 45.3 (CH<sub>2</sub>), 29.9 (CH<sub>3</sub>), 27.4 (CH<sub>2</sub>), 26.6 (CH<sub>3</sub>). IR (ATR): 3287, 1709, 1630, 1543, 1160, 697 cm<sup>-1</sup>. MS (EI) *m/z* (relative intensity) 281 (15) [M<sup>+</sup>], 250 (5), 238 (100), 207 (40), 178 (20), 165 (15). HR-MS (EI) *m/z* calcd for C<sub>18</sub>H<sub>19</sub>NO<sub>2</sub> [M<sup>+</sup>] 281.1416, found 281.1417.

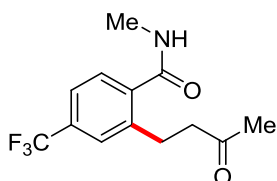

### ***N*-Methyl-2-(3-oxobutyl)-4-(trifluoromethyl)benzamide (3ea)**

The general procedure **A** was followed using **1e** (102 mg, 0.5 mmol) and methyl vinyl ketone (**2a**) (70 mg, 1.0 mmol) for 20 h. Purification by column chromatography (*n*-hexane/EtOAc 1:1→1:2) yielded **3ea** (99 mg, 73%) as a colorless solid. M. p. = 117–119 °C. <sup>1</sup>H-NMR (CDCl<sub>3</sub>, 300 MHz): δ = 7.46 – 7.43 (m, 3H), 6.58 (br s, 1H), 2.99 (d, *J* = 4.9 Hz, 3H), 2.96 (t, *J* = 5.0 Hz, 2H), 2.94 (t, *J* = 5.0 Hz, 2H), 2.13 (s, 3H). <sup>13</sup>C-NMR (CDCl<sub>3</sub>, 125 MHz): δ = 207.9 (C<sub>q</sub>), 169.2 (C<sub>q</sub>), 140.1 (C<sub>q</sub>), 139.6 (C<sub>q</sub>), 131.8 (C<sub>q</sub>, *J*<sub>C-F</sub> = 32.4 Hz), 127.8 (CH), 126.2 (CH, *J*<sub>C-F</sub> = 3.7 Hz), 124.0 (C<sub>q</sub>, *J*<sub>C-F</sub> = 271.5 Hz), 123.1 (CH, *J*<sub>C-F</sub> = 3.7 Hz), 44.7 (CH<sub>2</sub>), 30.02 (CH<sub>3</sub>), 26.8 (CH<sub>2</sub>), 26.8 (CH<sub>3</sub>). <sup>19</sup>F-NMR (CDCl<sub>3</sub>, 282 MHz): δ = -62.9 (s). IR (ATR): 3294, 1713, 1550, 1333, 1114, 696 cm<sup>-1</sup>. MS (EI) *m/z* (relative intensity) 273 (5) [M<sup>+</sup>], 254 (5), 230 (60), 199 (20), 151 (10), 43 (100). HR-MS (EI) *m/z* calcd for C<sub>13</sub>H<sub>14</sub>F<sub>3</sub>NO<sub>2</sub> [M<sup>+</sup>] 273.0977, found 273.0973.

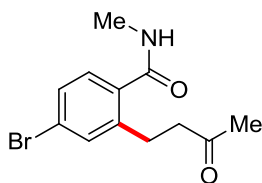

#### 4-Bromo-*N*-methyl-2-(3-oxobutyl)benzamide (**3fa**)

The general procedure **A** was followed using **1f** (107 mg, 0.5 mmol) and methyl vinyl ketone (**2a**) (70 mg, 1.0 mmol) for 20 h. Purification by column chromatography (*n*-hexane/EtOAc 2:1→1:1) yielded **3fa** (113 mg, 81%) as a colorless solid. M. p. = 132–134 °C. <sup>1</sup>H-NMR (CDCl<sub>3</sub>, 300 MHz): δ = 7.40 – 7.29 (m, 2H), 7.27 – 7.21 (m, 1H), 6.52 (br s, 1H), 2.99 – 2.92 (m, 4H), 2.92 (d, *J* = 1.6 Hz, 3H), 2.15 (s, 3H). <sup>13</sup>C-NMR (CDCl<sub>3</sub>, 125 MHz): δ = 208.0 (C<sub>q</sub>), 169.5 (C<sub>q</sub>), 141.1 (C<sub>q</sub>), 135.6 (C<sub>q</sub>), 132.4 (CH), 129.3 (CH), 128.8 (CH), 124.0 (C<sub>q</sub>), 44.8 (CH<sub>2</sub>), 30.0 (CH<sub>3</sub>), 26.8 (CH<sub>2</sub>), 26.7 (CH<sub>3</sub>) IR (ATR): 3287, 1705, 1639, 1543, 1167, 686 cm<sup>-1</sup>. MS (EI) *m/z* (relative intensity) 283 (5) [M<sup>+</sup>], 240 (100), 225 (10), 211 (35), 183 (10), 102 (20). HR-MS (ESI) *m/z* calcd for C<sub>12</sub>H<sub>14</sub>NO<sub>2</sub><sup>79</sup>Br [M<sup>+</sup>] 283.0208, found 283.0210.

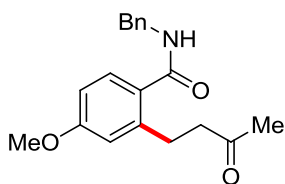

#### *N*-Benzyl-4-methoxy-2-(3-oxobutyl)benzamide (**3ga**)

The general procedure **A** was followed using **1g** (121 mg, 0.5 mmol) and methyl vinyl ketone (**2a**) (70 mg, 1.0 mmol) for 20 h. Purification by column chromatography (*n*-hexane/EtOAc 2:1) yielded **3ga** (106 mg, 68%) as a colorless solid. M. p. = 131–133 °C. <sup>1</sup>H-NMR (CDCl<sub>3</sub>, 300 MHz): δ = 7.37 – 7.31 (m, 5H), 7.32 – 7.25 (m, 1H), 6.74 (d, *J* = 2.6 Hz, 1H), 6.70 (dd, *J* = 8.4, 2.6 Hz, 1H), 6.44 (br s, 1H), 4.59 (d, *J* = 5.8 Hz, 2H), 3.78 (s, 3H), 2.99 (t, *J* = 7.1 Hz, 2H), 2.86 (t, *J* = 7.1 Hz, 2H), 2.09 (s, 3H). <sup>13</sup>C-NMR (CDCl<sub>3</sub>, 125 MHz): δ = 208.3 (C<sub>q</sub>), 169.4 (C<sub>q</sub>), 160.8 (C<sub>q</sub>), 141.9 (C<sub>q</sub>), 138.3 (C<sub>q</sub>), 128.8 (CH), 128.8 (CH), 128.6 (C<sub>q</sub>), 127.8 (CH), 127.5 (CH), 115.7 (CH), 111.3 (CH), 55.3 (CH<sub>3</sub>), 45.3 (CH<sub>2</sub>), 44.0 (CH<sub>2</sub>), 29.9 (CH<sub>3</sub>), 27.7 (CH<sub>2</sub>). IR (ATR): 3280, 1706, 1628, 1268, 1025, 694 cm<sup>-1</sup>. MS (EI) *m/z* (relative intensity) 311 (15) [M<sup>+</sup>], 268 (45), 205 (20), 161 (30), 106 (25), 91 (100). HR-MS (ESI) *m/z* calcd for C<sub>19</sub>H<sub>22</sub>NO<sub>3</sub> [M+H<sup>+</sup>] 312.1600, found 312.1600.

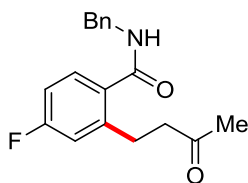

### ***N*-Benzyl-4-fluoro-2-(3-oxobutyl)benzamide (3ha)**

The general procedure **A** was followed using **1h** (115 mg, 0.5 mmol) and methyl vinyl ketone (**2a**) (70 mg, 1.0 mmol) for 20 h. Purification by column chromatography (*n*-hexane/EtOAc 5:1→2:1) yielded **3ha** (109 mg, 73%) as a colorless solid. M. p. = 112–114 °C. <sup>1</sup>H-NMR (CDCl<sub>3</sub>, 300 MHz): δ = 7.40 – 7.25 (m, 6H), 6.93 – 6.81 (m, 2H), 6.74 (t, *J* = 5.8 Hz, 1H), 4.57 (d, *J* = 5.8 Hz, 2H), 2.94 (t, *J* = 6.6 Hz, 2H), 2.83 (t, *J* = 6.6 Hz, 2H), 2.07 (s, 3H). <sup>13</sup>C-NMR (CDCl<sub>3</sub>, 75 MHz): δ = 208.0 (C<sub>q</sub>), 168.9 (C<sub>q</sub>), 163.4 (C<sub>q</sub>, *J*<sub>C-F</sub> = 249.7 Hz), 142.3 (C<sub>q</sub>, *J*<sub>C-F</sub> = 7.8 Hz), 138.1 (C<sub>q</sub>), 132.5 (C<sub>q</sub>, *J*<sub>C-F</sub> = 3.1 Hz), 129.3 (CH, *J*<sub>C-F</sub> = 8.8 Hz), 128.8 (CH), 127.8 (CH), 127.6 (CH), 116.6 (CH, *J*<sub>C-F</sub> = 21.4 Hz), 113.2 (CH, *J*<sub>C-F</sub> = 21.6 Hz), 44.7 (CH<sub>2</sub>), 44.0 (CH<sub>2</sub>), 29.9 (CH<sub>3</sub>), 27.1 (CH<sub>2</sub>, *J*<sub>C-F</sub> = 1.6 Hz). <sup>19</sup>F-NMR (CDCl<sub>3</sub>, 282 MHz): δ = -110.4 (ddd, *J* = 9.8, 8.1, 5.8 Hz). IR (ATR): 3281, 1709, 1635, 1234, 1168, 694 cm<sup>-1</sup>. MS (EI) *m/z* (relative intensity) 299 (10) [M<sup>+</sup>], 256 (30), 193 (10), 149 (25), 106 (65), 91 (100). HR-MS (EI) *m/z* calcd for C<sub>18</sub>H<sub>18</sub>FNO<sub>2</sub> [M<sup>+</sup>] 299.1322, found 299.1323.

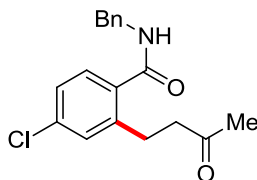

### ***N*-benzyl-4-chloro-2-(3-oxobutyl)benzamide (3ia)**

The general procedure **A** was followed using **1i** (123 mg, 0.5 mmol) and methyl vinyl ketone (**2a**) (70 mg, 1.0 mmol) for 20 h. Purification by column chromatography (*n*-hexane/EtOAc 2:1) yielded **3ia** (97 mg, 62%) as a colorless solid. M. p. = 125–126 °C. <sup>1</sup>H-NMR (CDCl<sub>3</sub>, 300 MHz): δ = 7.37 – 7.25 (m, 6H), 7.20 – 7.18 (m, 1H), 7.16 (dd, *J* = 8.1, 2.1 Hz, 1H), 6.67 (d, *J* = 6.4 Hz, 1H), 4.59 (d, *J* = 5.8 Hz, 2H), 2.93 (t, *J* = 6.6 Hz, 2H), 2.85 (t, *J* = 6.6 Hz, 2H), 2.09 (s, 3H). <sup>13</sup>C-NMR (CDCl<sub>3</sub>, 125 MHz): δ = 207.7 (C<sub>q</sub>), 168.6 (C<sub>q</sub>), 141.2 (C<sub>q</sub>), 137.9 (C<sub>q</sub>), 135.8 (C<sub>q</sub>), 134.7 (C<sub>q</sub>), 129.8 (CH), 128.7 (CH), 128.6 (CH), 127.8 (CH), 127.6 (CH), 126.4 (CH), 44.8 (CH<sub>2</sub>), 44.1 (CH<sub>2</sub>), 30.0 (CH<sub>3</sub>), 27.0 (CH<sub>2</sub>). IR (ATR): 3279, 1708, 1637, 1541, 1163, 692 cm<sup>-1</sup>. MS (EI) *m/z* (relative intensity) 315 (10) [M<sup>+</sup>], 272 (30), 209 (5), 165 (15), 106 (75), 91 (100). HR-MS (EI) *m/z* calcd for C<sub>18</sub>H<sub>18</sub>NCIO<sub>2</sub> [M<sup>+</sup>] 315.1026, found 315.1030.



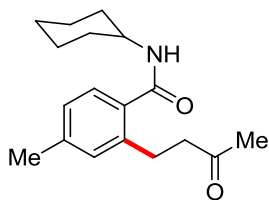

### ***N*-Cyclohexyl-4-methyl-2-(3-oxobutyl)benzamide (3ja)**

The general procedure **A** was followed using **1j** (109 mg, 0.5 mmol) and methyl vinyl ketone (**2a**) (70 mg, 1.0 mmol) for 20 h. Purification by column chromatography (*n*-hexane/EtOAc 3:1) yielded **3ja** (100 mg, 70%) as a colorless solid. M. p. = 143–145 °C. <sup>1</sup>H-NMR (CDCl<sub>3</sub>, 300 MHz): δ = 7.30 – 7.20 (m, 1H), 7.02 (s, 1H), 7.01 (d, *J* = 6.8 Hz, 1H), 6.04 (d, *J* = 8.2 Hz, 1H), 4.13 – 3.82 (m, 1H), 2.96 (t, *J* = 6.2 Hz, 2H), 2.87 (t, *J* = 6.2 Hz, 2H), 2.32 (s, 3H), 2.12 (s, 3H), 2.05 – 1.95 (m, 2H), 1.78 – 1.59 (m, 3H), 1.54 – 1.32 (m, 2H), 1.31 – 1.09 (m, 3H). <sup>13</sup>C-NMR (CDCl<sub>3</sub>, 125 MHz): δ = 208.2 (C<sub>q</sub>), 169.0 (C<sub>q</sub>), 139.8 (C<sub>q</sub>), 138.9 (C<sub>q</sub>), 134.1 (C<sub>q</sub>), 130.5 (CH), 127.0 (CH), 126.8 (CH), 48.6 (CH), 45.4 (CH<sub>2</sub>), 33.2 (CH<sub>2</sub>), 30.0 (CH<sub>3</sub>), 27.4 (CH<sub>2</sub>), 25.6 (CH<sub>2</sub>), 25.0 (CH<sub>2</sub>), 21.3 (CH<sub>3</sub>). IR (ATR): 3278, 2923, 1712, 1631, 1537, 699 cm<sup>-1</sup>. MS (EI) *m/z* (relative intensity) 287 (35) [M<sup>+</sup>], 244 (100), 189 (70), 162 (70), 145 (60). HR-MS (EI) *m/z* calcd for C<sub>18</sub>H<sub>25</sub>NO<sub>2</sub> [M<sup>+</sup>] 287.1885, found 287.1879.

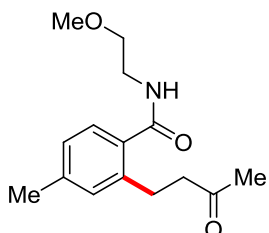

### ***N*-(2-Methoxyethyl)-4-methyl-2-(3-oxobutyl)benzamide (3ka)**

The general procedure **A** was followed using **1k** (97 mg, 0.5 mmol) and methyl vinyl ketone (**2a**) (70 mg, 1.0 mmol) for 20 h. Purification by column chromatography (*n*-hexane/EtOAc 1:1→1:2) yielded **3ka** (76 mg, 58%) as an oil. <sup>1</sup>H-NMR (CDCl<sub>3</sub>, 300 MHz): δ = 7.25 (d, *J* = 7.7 Hz, 1H), 7.01 (s, 1H), 7.00 (d, *J* = 7.7 Hz, 1H), 6.40 (br s, 1H), 3.60 (dt, *J* = 6.2, 1.4 Hz, 2H), 3.53 (dt, *J* = 6.2, 1.4 Hz, 2H), 3.35 (s, 3H), 2.95 (dt, *J* = 6.8, 2.1 Hz, 2H), 2.83 (dt, *J* = 6.8, 2.1 Hz, 2H), 2.31 (s, 3H), 2.11 (s, 3H). <sup>13</sup>C-NMR (CDCl<sub>3</sub>, 125 MHz): δ = 208.1 (C<sub>q</sub>), 169.8 (C<sub>q</sub>), 140.1 (C<sub>q</sub>), 139.3 (C<sub>q</sub>), 133.4 (C<sub>q</sub>), 130.8 (CH), 127.1 (CH), 126.8 (CH), 71.2 (CH<sub>2</sub>), 58.8 (CH<sub>3</sub>), 45.6 (CH<sub>2</sub>), 39.6 (CH<sub>2</sub>), 30.0 (CH<sub>3</sub>), 27.6 (CH<sub>2</sub>), 21.3 (CH<sub>3</sub>). IR (ATR): 3313, 2928, 1640, 1530, 1302, 1121 cm<sup>-1</sup>. MS (EI) *m/z* (relative intensity) 263 (5) [M<sup>+</sup>], 248 (10), 231 (10), 220 (30), 189 (75), 145 (100). HR-MS (EI) *m/z* calcd for C<sub>15</sub>H<sub>21</sub>NO<sub>3</sub> [M<sup>+</sup>] 263.1521, found 263.1524.

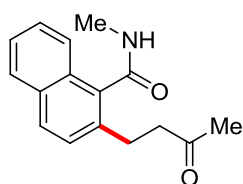

### ***N*-Methyl-2-(3-oxobutyl)-1-naphthamide (3la)**

The general procedure **A** was followed using **11** (93 mg, 0.5 mmol) and methyl vinyl ketone (**2a**) (70 mg, 1.0 mmol) for 20 h. Purification by column chromatography (*n*-hexane/EtOAc 2:1) yielded **3la** (57 mg, 45%) as a colorless solid. M. p. = 153–155 °C. <sup>1</sup>H-NMR (CDCl<sub>3</sub>, 300 MHz): δ = 7.91 – 7.62 (m, 3H), 7.54 – 7.35 (m, 2H), 7.25 (d, *J* = 8.3 Hz, 1H), 6.46 (br s, 1H), 3.08 (d, *J* = 5.4 Hz, 3H), 3.01 – 2.78 (m, 4H), 2.09 (s, 3H). <sup>13</sup>C-NMR (CDCl<sub>3</sub>, 125 MHz): δ = 208.0 (C<sub>q</sub>), 170.1 (C<sub>q</sub>), 134.6 (C<sub>q</sub>), 134.1 (C<sub>q</sub>), 131.8 (C<sub>q</sub>), 130.2 (C<sub>q</sub>), 129.1 (CH), 127.8 (CH), 126.8 (CH), 126.3 (CH), 125.6 (CH), 124.8 (CH), 44.7 (CH<sub>2</sub>), 30.1 (CH<sub>3</sub>), 27.4 (CH<sub>2</sub>), 26.6 (CH<sub>3</sub>). IR (ATR): 3261, 1704, 1627, 1260, 745, 448 cm<sup>-1</sup>. MS (EI) *m/z* (relative intensity) 255 (20) [M<sup>+</sup>], 224 (10), 212 (100), 197 (20), 181 (50), 155 (25). HR-MS (EI) *m/z* calcd for C<sub>16</sub>H<sub>17</sub>NO<sub>2</sub> [M<sup>+</sup>] 255.1259, found 255.1261.

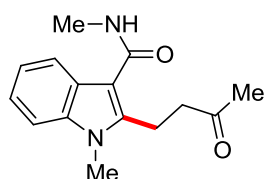

### ***N*,1-Dimethyl-2-(3-oxobutyl)-1*H*-indole-3-carboxamide (3ma)**

The general procedure **A** was followed using **1m** (94 mg, 0.5 mmol) and methyl vinyl ketone (**2a**) (70 mg, 1.0 mmol) for 20 h. Purification by column chromatography (*n*-hexane/EtOAc 2:1→1:1) yielded **3ma** (65 mg, 50%) as a colorless solid. M. p. = 151–153 °C. <sup>1</sup>H-NMR (CDCl<sub>3</sub>, 300 MHz): δ = 7.67 (dd, *J* = 7.0, 2.0 Hz, 1H), 7.35 – 7.29 (m, 1H), 7.26 – 7.15 (m, 2H), 6.08 (br s, 1H), 3.74 (s, 3H), 3.35 (t, *J* = 7.5 Hz, 2H), 3.04 (d, *J* = 4.9 Hz, 3H), 2.93 (t, *J* = 7.5 Hz, 2H), 2.15 (s, 3H). <sup>13</sup>C-NMR (CDCl<sub>3</sub>, 75 MHz): δ = 207.8 (C<sub>q</sub>), 166.6 (C<sub>q</sub>), 144.9 (C<sub>q</sub>), 136.6 (C<sub>q</sub>), 124.8 (C<sub>q</sub>), 121.8 (CH), 121.2 (CH), 118.4 (CH), 110.0 (CH), 107.6 (C<sub>q</sub>), 43.3 (CH<sub>2</sub>), 29.9 (CH<sub>3</sub>), 29.6 (CH<sub>3</sub>), 26.3 (CH<sub>3</sub>), 19.8 (CH<sub>2</sub>). IR (ATR): 3293, 1711, 1619, 1539, 1167, 734 cm<sup>-1</sup>. MS (EI) *m/z* (relative intensity) 258 (55) [M<sup>+</sup>], 227 (15), 215 (80), 200 (10), 184 (100), 172 (15), 158 (85). HR-MS (EI) *m/z* calcd for C<sub>15</sub>H<sub>18</sub>N<sub>2</sub>O<sub>2</sub> [M<sup>+</sup>] 258.1368, found 258.1363.

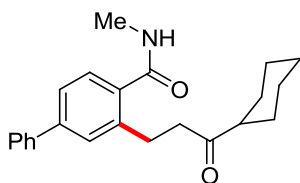

### 3-(3-Cyclohexyl-3-oxopropyl)-*N*-methyl-[1,1'-biphenyl]-4-carboxamide (**3db**)

The general procedure **A** was followed using **1d** (106 mg, 0.5 mmol) and **2b** (138 mg, 1.0 mmol) for 20 h. Purification by column chromatography (*n*-hexane/EtOAc 1:1→1:2) yielded **3db** (79 mg, 45%) as a colorless solid. M. p. = 155–157 °C. <sup>1</sup>H-NMR (CDCl<sub>3</sub>, 300 MHz): δ = 7.55 (d, *J* = 7.4 Hz, 2H), 7.50 – 7.30 (m, 6H), 6.56 (br s, 1H), 3.00 (d, *J* = 4.9 Hz, 3H), 2.99 (t, *J* = 5.7 Hz, 2H), 2.94 (t, *J* = 5.7 Hz, 2H), 2.34 – 2.25 (m, 1H), 1.82 – 1.70 (m, 4H), 1.34 – 1.11 (m, 6H). <sup>13</sup>C-NMR (CDCl<sub>3</sub>, 125 MHz): δ = 213.7 (C<sub>q</sub>), 170.3 (C<sub>q</sub>), 142.6 (C<sub>q</sub>), 140.2 (C<sub>q</sub>), 139.6 (C<sub>q</sub>), 135.4 (C<sub>q</sub>), 128.7 (CH), 128.3 (CH), 127.8 (CH), 127.6 (CH), 127.0 (CH), 124.8 (CH), 50.9 (CH), 42.2 (CH<sub>2</sub>), 28.5 (CH<sub>2</sub>), 27.3 (CH<sub>2</sub>), 26.8 (CH<sub>3</sub>), 25.9 (CH<sub>2</sub>), 25.7 (CH<sub>2</sub>). IR (ATR): 3289, 2927, 1699, 1630, 1538, 1312, 697 cm<sup>-1</sup>. MS (EI) *m/z* (relative intensity) 349 (20) [M<sup>+</sup>], 318 (5), 238 (100), 209 (40), 178 (15), 165 (15). HR-MS (EI) *m/z* calcd for C<sub>23</sub>H<sub>27</sub>NO<sub>2</sub> [M<sup>+</sup>] 349.2042, found 249.2039.

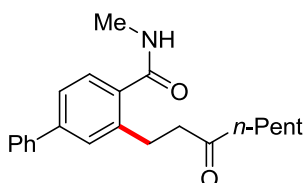

### *N*-Methyl-3-(3-oxooct-1-yl)-[1,1'-biphenyl]-4-carboxamide (**3dc**)

The general procedure **A** was followed using **1d** (106 mg, 0.5 mmol) and **2c** (126 mg, 1.0 mmol) for 20 h. Purification by column chromatography (*n*-hexane/EtOAc 1:1) yielded **3dc** (84 mg, 50%) as a colorless solid. M. p. = 128–130 °C. <sup>1</sup>H-NMR (CDCl<sub>3</sub>, 500 MHz): δ = 7.57 – 7.50 (m, 2H), 7.46 – 7.38 (m, 5H), 7.37 – 7.32 (m, 1H), 6.46 (br s, *J* = 4.9 Hz, 1H), 3.03 (t, *J* = 7.2 Hz, 2H), 3.00 (d, *J* = 4.9 Hz, 3H), 2.90 (t, *J* = 7.2 Hz, 2H), 2.36 (t, *J* = 7.5 Hz, 2H), 1.52 (p, *J* = 7.5 Hz, 2H), 1.31 – 1.13 (m, 4H), 0.83 (t, *J* = 7.1 Hz, 3H). <sup>13</sup>C-NMR (CDCl<sub>3</sub>, 125 MHz): δ = 211.1 (C<sub>q</sub>), 170.4 (C<sub>q</sub>), 142.8 (C<sub>q</sub>), 140.2 (C<sub>q</sub>), 139.6 (C<sub>q</sub>), 135.5 (C<sub>q</sub>), 128.8 (CH), 128.5 (CH), 127.9 (CH), 127.7 (CH), 127.1 (CH), 124.9 (CH), 44.2 (CH<sub>2</sub>), 43.0 (CH<sub>2</sub>), 31.4 (CH<sub>2</sub>), 27.3 (CH<sub>2</sub>), 26.7 (CH<sub>3</sub>), 23.5 (CH<sub>2</sub>), 22.4 (CH<sub>2</sub>), 13.9 (CH<sub>3</sub>). IR (ATR): 3287, 1710, 1632, 1542, 1164, 693 cm<sup>-1</sup>. MS (EI) *m/z* (relative intensity) 337 (5) [M<sup>+</sup>], 281 (25), 238 (100), 223 (5), 207 (35), 178 (15). HR-MS (EI) *m/z* calcd for C<sub>22</sub>H<sub>27</sub>NO<sub>2</sub> [M<sup>+</sup>] 337.2042, found 337.2048.

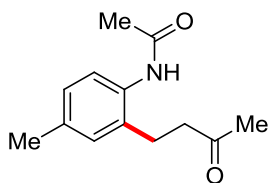

### ***N*-(4-Methyl-2-(3-oxobutyl)phenyl)acetamide (5aa)**

The general procedure **A** was followed using **4a** (75 mg, 0.5 mmol), methyl vinyl ketone (**2a**) (70 mg, 1.0 mmol) and  $\text{KO}_2\text{CMes}$  (51 mg, 50 mol %) for 20 h. Purification by column chromatography (*n*-hexane/EtOAc 2:1→1:1) yielded **5aa** (51 mg, 47%) as a colorless solid. M. p. = 124–126 °C.  $^1\text{H-NMR}$  ( $\text{CDCl}_3$ , 300 MHz):  $\delta$  = 8.84 (br s, 1H), 7.62 (d,  $J$  = 8.2 Hz, 1H), 6.99 (dd,  $J$  = 8.2, 2.1 Hz, 1H), 6.89 (d,  $J$  = 2.1 Hz, 1H), 2.87 (dt,  $J$  = 6.2, 2.0 Hz, 2H), 2.75 (dt,  $J$  = 6.2, 2.0 Hz, 2H), 2.26 (s, 3H), 2.24 (s, 3H), 2.12 (s, 3H).  $^{13}\text{C-NMR}$  ( $\text{CDCl}_3$ , 75 MHz):  $\delta$  = 210.3 ( $\text{C}_q$ ), 168.8 ( $\text{C}_q$ ), 134.7 ( $\text{C}_q$ ), 133.0 ( $\text{C}_q$ ), 132.6 ( $\text{C}_q$ ), 130.3 (CH), 127.7 (CH), 124.4 (CH), 45.3 ( $\text{CH}_2$ ), 29.9 ( $\text{CH}_3$ ), 24.2 ( $\text{CH}_3$ ), 23.8 ( $\text{CH}_2$ ), 20.8 ( $\text{CH}_3$ ). IR (ATR): 3282, 1709, 1641, 1522, 1287, 811  $\text{cm}^{-1}$ . MS (EI)  $m/z$  (relative intensity) 219 (60) [ $\text{M}^+$ ], 176 (75), 162 (40), 134 (100), 120 (85), 107 (10). HR-MS (EI)  $m/z$  calcd for  $\text{C}_{13}\text{H}_{17}\text{NO}_2$  [ $\text{M}^+$ ] 219.1259, found 219.1259.

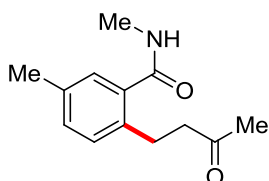

### ***N*,5-Dimethyl-2-(3-oxobutyl)benzamide (3na)**

The general procedure **A** was followed using **1n** (75 mg, 0.5 mmol) and methyl vinyl ketone (**2a**) (70 mg, 1.0 mmol) for 20 h. Purification by column chromatography (*n*-hexane/EtOAc 2:1→1:1) yielded **3na** (68 mg, 62%) as a colorless solid. M. p. = 112–114 °C.  $^1\text{H-NMR}$  ( $\text{CDCl}_3$ , 300 MHz):  $\delta$  = 7.15 (d,  $J$  = 1.8 Hz, 1H), 7.10 (dd,  $J$  = 7.9, 1.8 Hz, 1H), 7.07 (d,  $J$  = 7.9 Hz, 1H), 6.39 (br s, 1H), 2.96 (d,  $J$  = 4.9 Hz, 3H), 2.89 (t,  $J$  = 5.0 Hz, 2H), 2.87 (t,  $J$  = 5.0 Hz, 2H), 2.28 (s, 3H), 2.10 (s, 3H).  $^{13}\text{C-NMR}$  ( $\text{CDCl}_3$ , 125 MHz):  $\delta$  = 208.6 ( $\text{C}_q$ ), 170.6 ( $\text{C}_q$ ), 136.4 ( $\text{C}_q$ ), 135.8 ( $\text{C}_q$ ), 135.6 ( $\text{C}_q$ ), 130.6 (CH), 129.5 (CH), 127.8 (CH), 45.3 ( $\text{CH}_2$ ), 30.1 ( $\text{CH}_3$ ), 26.7 ( $\text{CH}_2$ ), 26.7 ( $\text{CH}_3$ ), 20.9 ( $\text{CH}_3$ ). IR (ATR): 3285, 1709, 1541, 1319, 1160, 697  $\text{cm}^{-1}$ . MS (EI)  $m/z$  (relative intensity) 219 (15) [ $\text{M}^+$ ], 189 (5), 176 (100), 161 (10), 145 (60), 117 (15). HR-MS (EI)  $m/z$  calcd for  $\text{C}_{13}\text{H}_{17}\text{NO}_2$  [ $\text{M}^+$ ] 219.1259, found 219.1252.

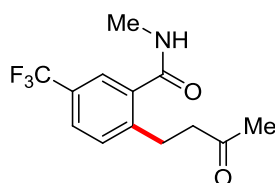

### ***N*-Methyl-2-(3-oxobutyl)-5-(trifluoromethyl)benzamide (3oa)**

The general procedure **A** was followed using **1o** (102 mg, 0.5 mmol) and methyl vinyl ketone (**2a**) (70 mg, 1.0 mmol) for 20 h. Purification by column chromatography (*n*-hexane/EtOAc 1:1→1:2) yielded **3oa** (85 mg, 62%) as a colorless solid. M. p. = 96–98 °C. <sup>1</sup>H-NMR (CDCl<sub>3</sub>, 300 MHz): δ = 7.60 (dt, *J* = 1.6, 0.7 Hz, 1H), 7.56 – 7.49 (m, 1H), 7.32 (dt, *J* = 8.3, 0.8 Hz, 1H), 6.61 (br s, 1H), 2.97 (t, *J* = 5.8 Hz, 2H), 2.98 (d, *J* = 5.2 Hz, 3H), 2.89 (t, *J* = 5.8 Hz, 2H), 2.11 (s, 3H). <sup>13</sup>C-NMR (CDCl<sub>3</sub>, 125 MHz): δ = 207.9 (C<sub>q</sub>), 169.0 (C<sub>q</sub>), 142.9 (C<sub>q</sub>, *J*<sub>C-F</sub> = 1.7 Hz), 137.2 (C<sub>q</sub>), 130.1 (CH), 128.6 (C<sub>q</sub>, *J*<sub>C-F</sub> = 32.8 Hz), 126.4 (CH, *J*<sub>C-F</sub> = 3.7 Hz), 124.3 (CH, *J*<sub>C-F</sub> = 3.8 Hz), 123.2 (C<sub>q</sub>, *J*<sub>C-F</sub> = 271.5 Hz), 44.7 (CH<sub>2</sub>), 30.0 (CH<sub>3</sub>), 26.9 (CH<sub>2</sub>), 26.8 (CH<sub>3</sub>). <sup>19</sup>F-NMR (CDCl<sub>3</sub>, 282 MHz): δ = -62.6 (s). IR (ATR): 3286, 1705, 1552, 1311, 1115, 641 cm<sup>-1</sup>. MS (EI) *m/z* (relative intensity) 273 (5) [M<sup>+</sup>], 243 (5), 230 (100), 215 (10), 199 (35), 189 (10). HR-MS (EI) *m/z* calcd for C<sub>13</sub>H<sub>14</sub>NO<sub>2</sub>F<sub>3</sub> [M<sup>+</sup>] 273.0977, found 273.0979.

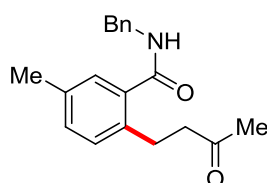

### ***N*-Benzyl-5-methyl-2-(3-oxobutyl)benzamide (3pa)**

The general procedure **A** was followed using **1p** (113 mg, 0.5 mmol) and methyl vinyl ketone (**2a**) (70 mg, 1.0 mmol) for 20 h. Purification by column chromatography (*n*-hexane/EtOAc 2:1) yielded **3pa** (94 mg, 64%) as a colorless solid. M. p. = 130–132 °C. <sup>1</sup>H-NMR (CDCl<sub>3</sub>, 300 MHz): δ = 7.43 – 7.25 (m, 5H), 7.17 (d, *J* = 0.9 Hz, 1H), 7.14 – 7.06 (m, 2H), 6.52 (br s, 1H), 4.60 (d, *J* = 5.8 Hz, 2H), 3.01 (t, *J* = 6.8 Hz, 2H), 2.82 (t, *J* = 6.8 Hz, 2H), 2.29 (s, 3H), 2.07 (s, 3H). <sup>13</sup>C-NMR (CDCl<sub>3</sub>, 75 MHz): δ = 208.5 (C<sub>q</sub>), 169.9 (C<sub>q</sub>), 138.2 (C<sub>q</sub>), 136.2 (C<sub>q</sub>), 136.0 (C<sub>q</sub>), 136.0 (C<sub>q</sub>), 130.8 (CH), 129.9 (CH), 128.8 (CH), 127.9 (CH), 127.7 (CH), 127.6 (CH), 45.4 (CH<sub>2</sub>), 44.0 (CH<sub>2</sub>), 29.9 (CH<sub>3</sub>), 26.9 (CH<sub>2</sub>), 20.8 (CH<sub>3</sub>). IR (ATR): 3242, 1707, 1634, 1311, 821, 702 cm<sup>-1</sup>. MS (EI) *m/z* (relative intensity) 295 (20) [M<sup>+</sup>], 252 (40), 189 (5), 145 (20), 106 (30), 91 (100). HR-MS (EI) *m/z* calcd for C<sub>19</sub>H<sub>21</sub>NO<sub>2</sub> [M<sup>+</sup>] 295.1572, found 295.1580.

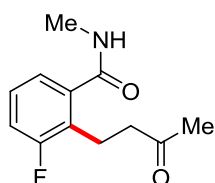

### 3-Fluoro-*N*-methyl-2-(3-oxobutyl)benzamide (**3qa**)

The general procedure **A** was followed using **1q** (77 mg, 0.5 mmol) and methyl vinyl ketone (**2a**) (70 mg, 1.0 mmol) for 20 h. Purification by column chromatography (*n*-hexane/EtOAc 1:1) yielded **3qa** (86 mg, 77%) as a colorless solid. M. p. = 123–125 °C. <sup>1</sup>H-NMR (CDCl<sub>3</sub>, 300 MHz): δ = 7.21 – 7.12 (m, 2H), 7.09 – 6.93 (m, 1H), 6.55 (br s, 1H), 2.96 (d, *J* = 4.9 Hz, 3H), 2.94 (t, *J* = 5.4 Hz, 2H), 2.89 (t, *J* = 5.4 Hz, 2H), 2.12 (s, 3H). <sup>13</sup>C-NMR (CDCl<sub>3</sub>, 75 MHz): δ = 208.7 (C<sub>q</sub>), 169.3 (C<sub>q</sub>, *J* = 3.2 Hz), 161.4 (C<sub>q</sub>, *J* = 246.1 Hz), 139.1 (C<sub>q</sub>, *J* = 4.3 Hz), 127.8 (CH, *J* = 8.9 Hz), 126.1 (C<sub>q</sub>, *J* = 16.7 Hz), 122.9 (CH, *J* = 3.4 Hz), 116.7 (CH, *J* = 23.0 Hz), 43.5 (CH<sub>2</sub>, *J* = 2.4 Hz), 29.8 (CH<sub>3</sub>), 26.7 (CH<sub>3</sub>), 21.1 (CH<sub>2</sub>, *J* = 2.9 Hz). <sup>19</sup>F-NMR (CDCl<sub>3</sub>, 282 MHz): δ = -116.1 (dd, *J* = 10.2, 4.4 Hz). IR (ATR): 3291, 1703, 1547, 1319, 1163, 710 cm<sup>-1</sup>. MS (EI) *m/z* (relative intensity) 223 (10) [M<sup>+</sup>], 180 (100), 165 (15), 149 (60), 121 (15), 101 (15). HR-MS (EI) *m/z* calcd for C<sub>12</sub>H<sub>14</sub>NO<sub>2</sub>F [M<sup>+</sup>] 223.1009, found 223.1006.

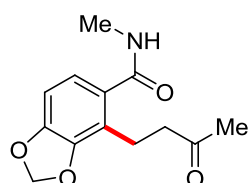

### *N*-Methyl-4-(3-oxobutyl)benzo[*d*][1,3]dioxole-5-carboxamide (**3ra**)

The general procedure **A** was followed using **1r** (90 mg, 0.5 mmol) and methyl vinyl ketone (**2a**) (70 mg, 1.0 mmol) for 20 h. Purification by column chromatography (*n*-hexane/EtOAc 1:1→1:2) yielded **3ra** (100 mg, 80%) as a colorless solid. M. p. = 139–141 °C. <sup>1</sup>H-NMR (CDCl<sub>3</sub>, 300 MHz): δ = 6.93 (d, *J* = 8.0 Hz, 1H), 6.64 (d, *J* = 8.0 Hz, 1H), 6.47 (br s, 1H), 5.95 (s, 2H), 2.94 (d, *J* = 4.9 Hz, 3H), 2.95 – 2.88 (m, 4H), 2.13 (s, 3H). <sup>13</sup>C-NMR (CDCl<sub>3</sub>, 125 MHz): δ = 208.7 (C<sub>q</sub>), 169.5 (C<sub>q</sub>), 148.1 (C<sub>q</sub>), 146.2 (C<sub>q</sub>), 131.0 (C<sub>q</sub>), 121.5 (CH), 121.1 (C<sub>q</sub>), 106.2 (CH), 101.1 (CH<sub>2</sub>), 43.0 (CH<sub>2</sub>), 29.9 (CH<sub>3</sub>), 26.7 (CH<sub>3</sub>), 21.7 (CH<sub>2</sub>). IR (ATR): 3301, 1706, 1543, 1251, 1040, 705 cm<sup>-1</sup>. MS (EI) *m/z* (relative intensity) 249 (25) [M<sup>+</sup>], 218 (15), 206 (100), 188 (5), 175 (65), 149 (15). HR-MS (EI) *m/z* calcd for C<sub>13</sub>H<sub>15</sub>NO<sub>4</sub> [M<sup>+</sup>] 249.1001, found 249.1006.

## Competition Experiment:

### Intermolecular Competition Experiments Between Arenes with Different Directing Groups:

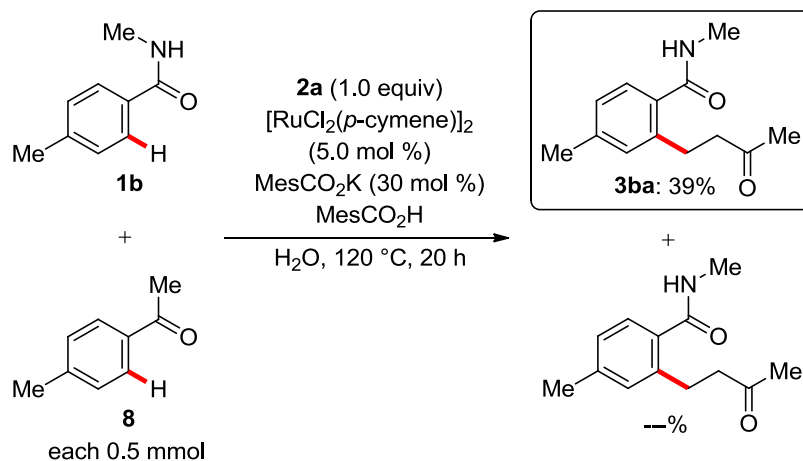

A suspension of MVK (**2a**) (35 mg, 0.5 mmol), *N*,4-dimethylbenzamide (**1b**) (75 mg, 0.5 mmol), 1-(*p*-tolyl)ethanone (**8**) (67 mg, 0.5 mmol),  $[\text{RuCl}_2(p\text{-cymene})]_2$  (15.3 mg, 5.0 mol %),  $\text{MesCO}_2\text{K}$  (30.3 mg, 30.0 mol %) and  $\text{MesCO}_2\text{H}$  (82 mg, 1.0 equiv) in  $\text{H}_2\text{O}$  (2.0 mL) was stirred at 120 °C for 20 h under an atmosphere of argon. At ambient temperature, aq. NaCl (15 mL) was added. The reaction mixture was extracted with EtOAc (3×20 mL). The combined organic layers were dried over  $\text{Na}_2\text{SO}_4$ . Evaporation of the solvents *in vacuo* and purification of the remaining residue by column chromatography on silica gel (*n*-hexane/EtOAc 1:1) yielded product **3ba** (43 mg, 39%) as the sole product.

## H/D Exchange Experiment:

### Ruthenium(II)-Catalyzed H/D Exchange on Substrate **1b** with D<sub>2</sub>O as the solvent:

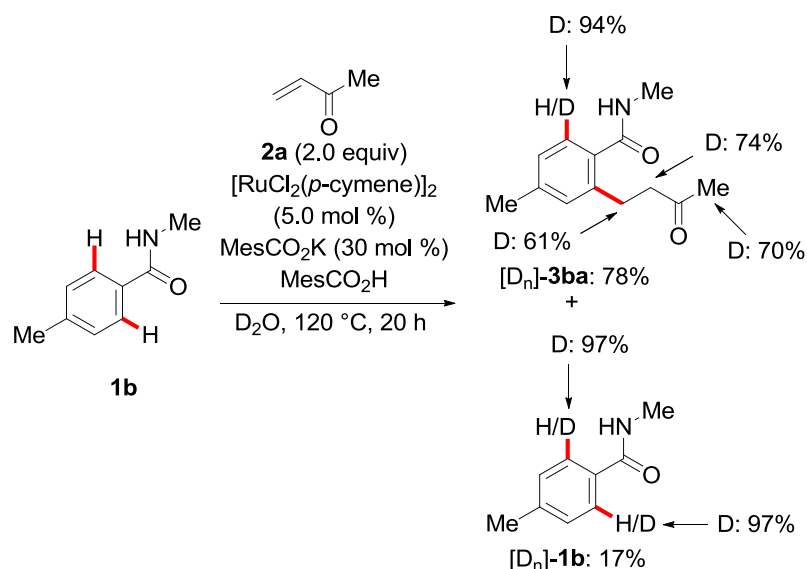

A suspension of MVK (**2a**) (70 mg, 1.0 mmol), *N*,4-dimethylbenzamide (**1b**) (75 mg, 0.5 mmol), [RuCl<sub>2</sub>(*p*-cymene)]<sub>2</sub> (15.3 mg, 5.0 mol %), MesCO<sub>2</sub>K (30.3 mg, 30.0 mol %) and MesCO<sub>2</sub>H (82 mg, 1.0 equiv) in a solvent of D<sub>2</sub>O (2.0 mL) was stirred at 120 °C for 20 h under an atmosphere of argon. At ambient temperature, aq. NaCl (15 mL) was added. The reaction mixture was extracted with EtOAc (3×20 mL). The combined organic layers were dried over Na<sub>2</sub>SO<sub>4</sub>. Evaporation of the solvents *in vacuo* and purification of the remaining residue by column chromatography on silica gel (*n*-hexane/EtOAc 1:1→1:2) yielded product [D<sub>n</sub>]-**3ba** (85 mg, 78%) as a white solid, and reisolated starting material [D<sub>n</sub>]-**1b** (13 mg, 17%) as a white solid. The deuterium-incorporation in [D<sub>n</sub>]-**3ba** and [D<sub>n</sub>]-**1b** was estimated by <sup>1</sup>H-NMR spectroscopy.



## Kinetic Isotope Effect

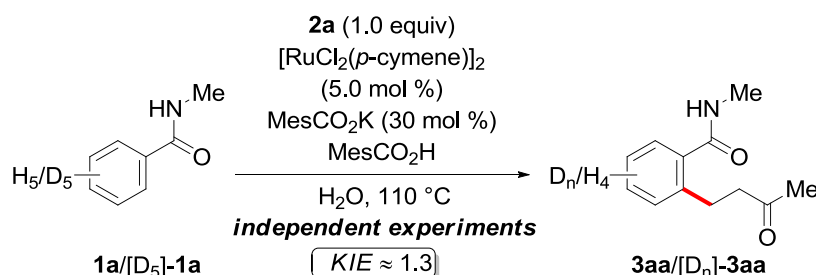

Two independent reactions with **1a** or deuterated substrate [D<sub>5</sub>]-**1a** under the standard conditions were performed: Suspensions of MVK (**2a**) (70 mg, 1.0 mmol), substrates **1a** (68 mg, 0.5 mmol) or [D<sub>5</sub>]-**1a** (70 mg, 0.5 mmol), [RuCl<sub>2</sub>(*p*-cymene)]<sub>2</sub> (15.3 mg, 5.0 mol %), MesCO<sub>2</sub>K (30.3 mg, 30.0 mol %) and MesCO<sub>2</sub>H (82 mg, 0.5 mmol) in H<sub>2</sub>O (2.0 mL) were stirred at 110 °C for 0.5 h, 1.5 h, 2.0 h, 2.5 h, 3.5 h, 4.5 h, 5.0 h under an atmosphere of argon, respectively. The consumption of substrate **1a** or [D<sub>5</sub>]-**1a** and the appearance of the products **3aa** or [D<sub>n</sub>]-**3aa** were monitored by GC analysis. These experiments indicated that the C–H bond activation is not the turnover-limiting step of the ruthenium(II)-catalyzed C–H alkylation reaction.

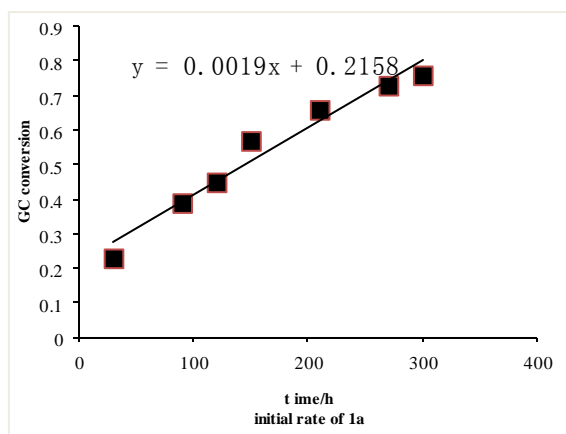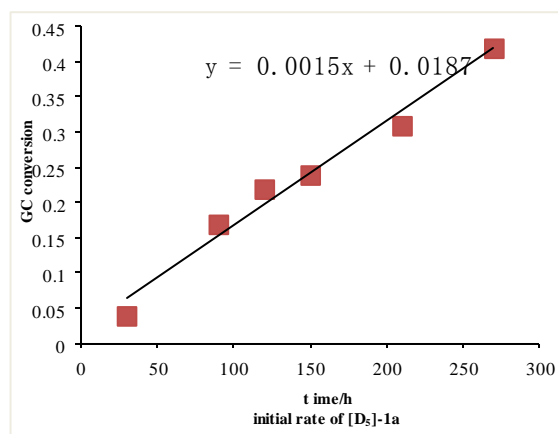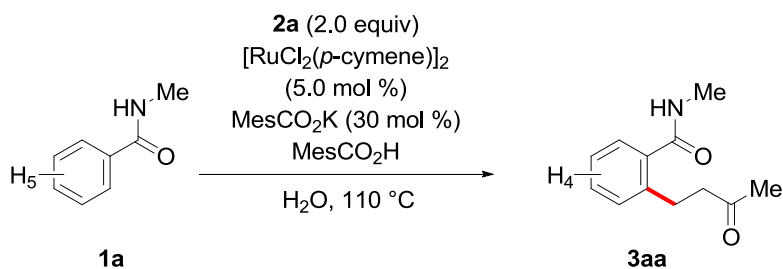

| t/(h)      | 0.5  | 1.5  | 2.0  | 2.5  | 3.5  | 4.5  | 5.0  |
|------------|------|------|------|------|------|------|------|
| <b>3aa</b> | 0.23 | 0.39 | 0.57 | 0.45 | 0.66 | 0.73 | 0.76 |

|           |             |             |             |             |             |             |             |
|-----------|-------------|-------------|-------------|-------------|-------------|-------------|-------------|
| <b>1a</b> | <b>0.77</b> | <b>0.61</b> | <b>0.43</b> | <b>0.55</b> | <b>0.34</b> | <b>0.27</b> | <b>0.24</b> |
|-----------|-------------|-------------|-------------|-------------|-------------|-------------|-------------|

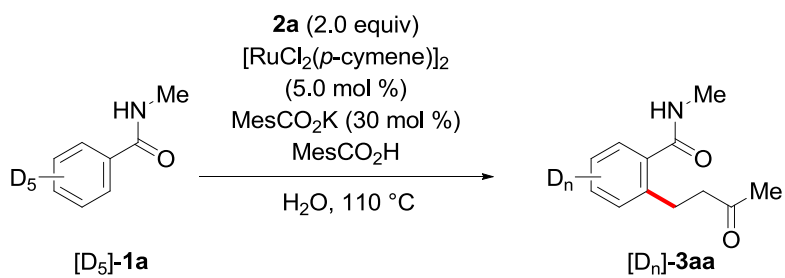

| t/(h)                      | 0.5         | 1.5         | 2.0         | 2.5         | 3.5         | 4.5         |
|----------------------------|-------------|-------------|-------------|-------------|-------------|-------------|
| <b>[D<sub>n</sub>]-3aa</b> | <b>0.04</b> | <b>0.17</b> | <b>0.22</b> | <b>0.24</b> | <b>0.31</b> | <b>0.42</b> |
| <b>[D<sub>5</sub>]-1a</b>  | <b>0.96</b> | <b>0.83</b> | <b>0.78</b> | <b>0.76</b> | <b>0.69</b> | <b>0.58</b> |

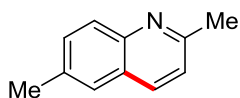

### 2,6-Dimethylquinoline (6aa)

The general procedure **B** was followed using **4a** (75 mg, 0.5 mmol) and methyl vinyl ketone (**2a**) (70 mg, 1.0 mmol) for 20 h. Purification by column chromatography (*n*-hexane/EtOAc 6:1) yielded **6aa** (52 mg, 66%) as a yellow oil.  $^1\text{H-NMR}$  ( $\text{CDCl}_3$ , 300 MHz):  $\delta$  = 7.91 (d,  $J$  = 8.7 Hz, 1H), 7.89 (d,  $J$  = 9.0 Hz, 1H), 7.49 (s, 1H), 7.48 (dd,  $J$  = 7.6, 1.8 Hz, 1H), 7.20 (d,  $J$  = 8.3 Hz, 1H), 2.69 (s, 3H), 2.48 (s, 3H).  $^{13}\text{C-NMR}$  ( $\text{CDCl}_3$ , 75 MHz):  $\delta$  = 157.9 ( $\text{C}_q$ ), 146.4 ( $\text{C}_q$ ), 135.5 (CH), 135.3 ( $\text{C}_q$ ), 131.6 (CH), 128.2 (CH), 126.4 ( $\text{C}_q$ ), 126.3 (CH), 121.9 (CH), 25.2 ( $\text{CH}_3$ ), 21.4 ( $\text{CH}_3$ ). IR (ATR): 2917, 1601, 1495, 1119, 825, 592  $\text{cm}^{-1}$ . MS (EI)  $m/z$  (relative intensity) 157 (100) [ $\text{M}^+$ ], 142 (20), 128 (10), 115 (20), 89 (10), 77 (10). HR-MS (EI)  $m/z$  calcd for  $\text{C}_{11}\text{H}_{11}\text{N}$  [ $\text{M}^+$ ] 157.0891, found 157.0884. The spectral data were in accordance with those reported in the literature.<sup>[4,5]</sup>

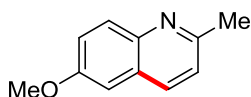

### 6-Methoxy-2-methylquinoline (6ba)

The general procedure **B** was followed using **4b** (83 mg, 0.5 mmol) and methyl vinyl ketone (**2a**) (70 mg, 1.0 mmol) for 20 h. Purification by column chromatography (*n*-hexane/EtOAc 3:1) yielded **6ba** (60 mg, 69%) as a yellow oil.  $^1\text{H-NMR}$  ( $\text{CDCl}_3$ , 300 MHz):  $\delta$  = 7.94 – 7.90 (m, 1H), 7.89 – 7.85 (m, 1H), 7.30 (dd,  $J$  = 9.2, 2.8 Hz, 1H), 7.20 (d,  $J$  = 8.4 Hz, 1H), 7.01 (d,  $J$  = 2.8 Hz, 1H), 3.88 (s, 3H), 2.67 (s, 3H).  $^{13}\text{C-NMR}$  ( $\text{CDCl}_3$ , 75 MHz):  $\delta$  = 157.1 ( $\text{C}_q$ ), 156.3 ( $\text{C}_q$ ), 143.9 ( $\text{C}_q$ ), 135.0 (CH), 130.0 (CH), 127.3 ( $\text{C}_q$ ), 122.2 (CH), 121.8 (CH), 105.2 (CH), 55.4 ( $\text{CH}_3$ ), 25.0 ( $\text{CH}_3$ ). IR (ATR): 2937, 1602, 1498, 1229, 1029, 830  $\text{cm}^{-1}$ . MS (EI)  $m/z$  (relative intensity) 173 (100) [ $\text{M}^+$ ], 158 (50), 143 (5), 130 (80), 115 (5), 103 (20). HR-MS (ESI)  $m/z$  calcd for  $\text{C}_{11}\text{H}_{12}\text{NO}$  [ $\text{M}+\text{H}^+$ ] 174.0919, found 174.0921. The spectral data were in accordance with those reported in the literature.<sup>[4,5]</sup>

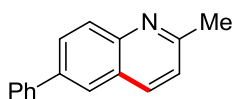

### 2-Methyl-6-phenylquinoline (6ca)

The general procedure **B** was followed using **4c** (106 mg, 0.5 mmol) and methyl vinyl ketone (**2a**) (70 mg, 1.0 mmol) for 20 h. Purification by column chromatography (*n*-hexane/EtOAc

5:1) yielded **6ca** (57 mg, 52%) as an off white solid. M. p. = 92–93 °C. <sup>1</sup>H-NMR (CDCl<sub>3</sub>, 300 MHz): δ = 8.09 (dd, *J* = 8.9, 2.1 Hz, 2H), 7.99 – 7.91 (m, 2H), 7.76 – 7.65 (m, 2H), 7.5 (d, *J* = 7.5 Hz, 1H), 7.48 (d, *J* = 6.6 Hz, 1H), 7.43 – 7.35 (m, 1H), 7.31 (d, *J* = 8.4 Hz, 1H), 2.77 (s, 3H). <sup>13</sup>C-NMR (CDCl<sub>3</sub>, 75 MHz): δ = 159.0 (C<sub>q</sub>), 147.3 (C<sub>q</sub>), 140.5 (C<sub>q</sub>), 138.4 (C<sub>q</sub>), 136.3 (CH), 129.1 (CH), 129.0 (CH), 128.9 (CH), 127.5 (CH), 127.4 (CH), 126.6 (C<sub>q</sub>), 125.2 (CH), 122.4 (CH), 25.4 (CH<sub>3</sub>). IR (ATR): 2998, 1595, 1488, 1314, 892, 764 cm<sup>-1</sup>. MS (EI) *m/z* (relative intensity) 219 (100) [M<sup>+</sup>], 204 (5), 191 (5), 176 (5), 152 (5). HR-MS (EI) *m/z* calcd for C<sub>16</sub>H<sub>13</sub>N [M<sup>+</sup>] 219.1048, found 219.1049. The spectral data were in accordance with those reported in the literature.<sup>[6]</sup>

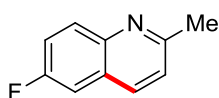

### 6-Fluoro-2-methylquinoline (**6da**)

The general procedure **B** was followed using **4d** (77 mg, 0.5 mmol), methyl vinyl ketone (**2a**) (70 mg, 1.0 mmol) and [RuCl<sub>2</sub>(*p*-cymene)]<sub>2</sub> (15.3 mg, 5.0 mol %) for 20 h. Purification by column chromatography (*n*-hexane/EtOAc 5:1) yielded **6da** (47 mg, 58%) as an off white solid. M. p. = 51–53 °C. <sup>1</sup>H-NMR (CDCl<sub>3</sub>, 300 MHz): δ = 8.05 – 7.91 (m, 2H), 7.42 (ddd, *J* = 9.1, 8.4, 2.8 Hz, 1H), 7.36 (dd, *J* = 8.9, 2.8 Hz, 1H), 7.27 (dd, *J* = 8.4, 0.8 Hz, 1H), 2.71 (s, 3H). <sup>13</sup>C-NMR (CDCl<sub>3</sub>, 75 MHz): δ = 159.9 (C<sub>q</sub>, *J*<sub>C-F</sub> = 250.1 Hz), 158.3 (C<sub>q</sub>), 144.9 (C<sub>q</sub>), 135.5 (CH, *J*<sub>C-F</sub> = 5.1 Hz), 131.0 (CH, *J*<sub>C-F</sub> = 9.0 Hz), 126.9 (C<sub>q</sub>, *J*<sub>C-F</sub> = 10.1 Hz), 122.7 (CH), 119.4 (CH, *J*<sub>C-F</sub> = 25.6 Hz), 110.5 (CH, *J*<sub>C-F</sub> = 21.8 Hz), 25.2 (CH<sub>3</sub>). <sup>19</sup>F-NMR (CDCl<sub>3</sub>, 282 MHz): δ = -115.0 (td, *J* = 8.6, 5.3 Hz). IR (ATR): 3058, 1652, 1439, 1329, 749, 509 cm<sup>-1</sup>. MS (EI) *m/z* (relative intensity) 161 (100) [M<sup>+</sup>], 146 (5), 133 (10). HR-MS (EI) *m/z* calcd for C<sub>10</sub>H<sub>8</sub>NF [M<sup>+</sup>] 161.0641, found 161.0638. The spectral data were in accordance with those reported in the literature.<sup>[4,7]</sup>

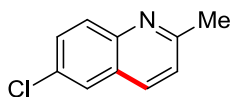

### 6-Chloro-2-methylquinoline (**6ea**)

The general procedure **B** was followed using **4e** (85 mg, 0.5 mmol), methyl vinyl ketone (**2a**) (70 mg, 1.0 mmol) and [RuCl<sub>2</sub>(*p*-cymene)]<sub>2</sub> (15.3 mg, 5.0 mol %) for 20 h. Purification by column chromatography (*n*-hexane/EtOAc 5:1) yielded **6ea** (53 mg, 60%) as an off white solid. M. p. = 95–97 °C. <sup>1</sup>H-NMR (CDCl<sub>3</sub>, 300 MHz): δ = 7.9 (d, *J* = 8.6 Hz, 2H), 7.7 (d, *J* = 2.4 Hz, 1H), 7.57 (dd, *J* = 9.0, 2.3 Hz, 1H), 7.26 (d, *J* = 8.4 Hz, 1H), 2.70 (s, 3H). <sup>13</sup>C-NMR

(CDCl<sub>3</sub>, 75 MHz):  $\delta$  = 159.3 (C<sub>q</sub>), 146.2 (C<sub>q</sub>), 135.2 (CH), 131.2 (C<sub>q</sub>), 130.2 (CH), 130.2 (CH), 127.0 (C<sub>q</sub>), 126.1 (CH), 122.8 (CH), 25.3 (CH<sub>3</sub>). IR (ATR): 3050, 1597, 1468, 1067, 830, 641 cm<sup>-1</sup>. MS (EI) m/z (relative intensity) 177 (100) [M<sup>+</sup>], 162 (10), 142 (15), 133 (15), 115 (15), 105 (5). HR-MS (EI) m/z calcd for C<sub>10</sub>H<sub>8</sub>NCl [M<sup>+</sup>] 177.0345, found 177.0341. The spectral data were in accordance with those reported in the literature.<sup>[4,7]</sup>

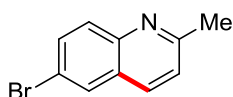

### 6-Bromo-2-methylquinoline (6fa)

The general procedure **B** was followed using **4f** (107 mg, 0.5 mmol), methyl vinyl ketone (**2a**) (70 mg, 1.0 mmol) and [RuCl<sub>2</sub>(*p*-cymene)]<sub>2</sub> (15.3 mg, 5.0 mol %) for 20 h. Purification by column chromatography (*n*-hexane/EtOAc 5:1) yielded **6fa** (56 mg, 51%) as an off white solid. M. p. = 98–100 °C. <sup>1</sup>H-NMR (CDCl<sub>3</sub>, 300 MHz):  $\delta$  = 7.95 – 7.90 (m, 1H), 7.89 (d, *J* = 2.3 Hz, 1H), 7.87 – 7.82 (m, 1H), 7.71 (dd, *J* = 9.0, 2.2 Hz, 1H), 7.27 (d, *J* = 8.5 Hz, 1H), 2.70 (s, 3H). <sup>13</sup>C-NMR (CDCl<sub>3</sub>, 75 MHz):  $\delta$  = 159.5 (C<sub>q</sub>), 146.4 (C<sub>q</sub>), 135.1 (CH), 132.8 (CH), 130.4 (CH), 129.5 (CH), 127.6 (C<sub>q</sub>), 122.8 (CH), 119.3 (C<sub>q</sub>), 25.4 (CH<sub>3</sub>). IR (ATR): 3048, 1594, 1488, 1300, 1071, 828 cm<sup>-1</sup>. MS (EI) m/z (relative intensity) 221 (100) [M<sup>+</sup>], 205 (5), 142 (20), 115 (30). HR-MS (EI) m/z calcd for C<sub>10</sub>H<sub>8</sub>N<sup>79</sup>Br [M<sup>+</sup>] 220.9840, found 220.9838. The spectral data were in accordance with those reported in the literature.<sup>[4,7,8]</sup>

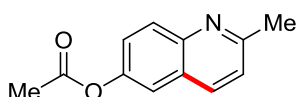

### 2-Methylquinolin-6-yl acetate (6ga)

The general procedure **B** was followed using **4g** (97 mg, 0.5 mmol), methyl vinyl ketone (**2a**) (70 mg, 1.0 mmol) and [RuCl<sub>2</sub>(*p*-cymene)]<sub>2</sub> (15.3 mg, 5.0 mol %) for 20 h. Purification by column chromatography (*n*-hexane/EtOAc 3:1) yielded **6ga** (51 mg, 51%) as an oil. <sup>1</sup>H-NMR (CDCl<sub>3</sub>, 300 MHz):  $\delta$  = 7.99 (d, *J* = 8.8 Hz, 1H), 7.96 (d, *J* = 8.5 Hz, 1H), 7.48 (d, *J* = 2.5 Hz, 1H), 7.38 (dd, *J* = 9.0, 2.6 Hz, 1H), 7.28 – 7.22 (m, 1H), 2.71 (s, 3H), 2.32 (s, 3H). <sup>13</sup>C-NMR (CDCl<sub>3</sub>, 75 MHz):  $\delta$  = 169.4 (C<sub>q</sub>), 158.8 (C<sub>q</sub>), 147.8 (C<sub>q</sub>), 145.8 (C<sub>q</sub>), 135.8 (CH), 130.1 (CH), 126.6 (C<sub>q</sub>), 124.4 (CH), 122.5 (CH), 118.1 (CH), 25.2 (CH<sub>3</sub>), 21.1 (CH<sub>3</sub>). IR (ATR): 1713, 1598, 1504, 1429, 1234, 832 cm<sup>-1</sup>. MS (EI) m/z (relative intensity) 201 (5) [M<sup>+</sup>], 159 (100), 130 (10), 103 (5). HR-MS (EI) m/z calcd for C<sub>12</sub>H<sub>11</sub>NO<sub>2</sub> [M<sup>+</sup>] 201.0790, found 201.0789. The spectral data were in accordance with those reported in the literature.<sup>[9]</sup>

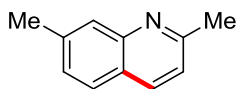

### 2,7-Dimethylquinoline (**6ha**)

The general procedure **B** was followed using **4h** (75 mg, 0.5 mmol) and methyl vinyl ketone (**2a**) (70 mg, 1.0 mmol) for 20 h. Purification by column chromatography (*n*-hexane/EtOAc 5:1) yielded **6ha** (49 mg, 62%) as an oil. <sup>1</sup>H-NMR (CDCl<sub>3</sub>, 300 MHz): δ = 7.96 (d, *J* = 8.4 Hz, 1H), 7.78 (d, *J* = 0.8 Hz, 1H), 7.63 (d, *J* = 8.3 Hz, 1H), 7.29 (dd, *J* = 8.3, 1.7 Hz, 1H), 7.19 (d, *J* = 8.4 Hz, 1H), 2.70 (s, 3H), 2.52 (s, 3H). <sup>13</sup>C-NMR (CDCl<sub>3</sub>, 75 MHz): δ = 158.9 (C<sub>q</sub>), 148.1 (C<sub>q</sub>), 139.6 (C<sub>q</sub>), 135.8 (CH), 127.8 (CH), 127.7 (CH), 127.1 (CH), 124.5 (C<sub>q</sub>), 121.1 (CH), 25.3 (CH<sub>3</sub>), 21.9 (CH<sub>3</sub>). IR (ATR): 2916, 1601, 1505, 1305, 835, 776 cm<sup>-1</sup>. MS (EI) *m/z* (relative intensity) 157 (100) [M<sup>+</sup>], 142 (20), 128 (5), 115 (15), 89 (5). HR-MS (EI) *m/z* calcd for C<sub>11</sub>H<sub>11</sub>N [M<sup>+</sup>] 157.0891, found 157.0889. The spectral data were in accordance with those reported in the literature.<sup>[4,10]</sup>

### References:

- [1] Q. Tang, D. Xia, X. Jin, Q. Zhang, X.-Q. Sun and C. Wang, *J. Am. Chem. Soc.* 2013, **135**, 4628–4631.
- [2] L. Ackermann, L. Wang, R. Wolfram and A. V. Lygin, *Org. Lett.*, 2012, **14**, 728–731.
- [3] G. Rouquet and N. Chatani, *Chem. Sci.*, 2013, **4**, 10737–10742.
- [4] Y. Matsubara, S. Hirakawa, Y. Yamaguchi and Z.-I. Yoshida, *Angew. Chem. Int. Ed.*, 2011, **50**, 7670–7673.
- [5] V. Sridharan, C. Avendaño and J. C. Menéndez, *Tetrahedron*, 2007, **63**, 673–681.
- [6] F. Mongin, L. Mojovic, B. Guillamet, F. Trécourt and G. Quéguiner, *J. Org. Chem.*, 2002, **67**, 8991–8994.
- [7] C. Ramesh, V. Kavala, C.-W. Kuo and C.-F. Yao, *Tetrahedron Lett.*, 2010, **51**, 5234–5237.
- [8] K. A. Reynolds, D. J. Young and W. A. Loughlin, *Synthesis*, 2010, 3645–3648.
- [9] K. Jyothish, R. R. Avirah and D. Ramaiah, *Org. Lett.*, 2006, **8**, 111–114.
- [10] J. Jaroszevska, I. Wawer and J. Oszczapowicz, *Org. Magn. Res.*, 1984, **22**, 323–327.

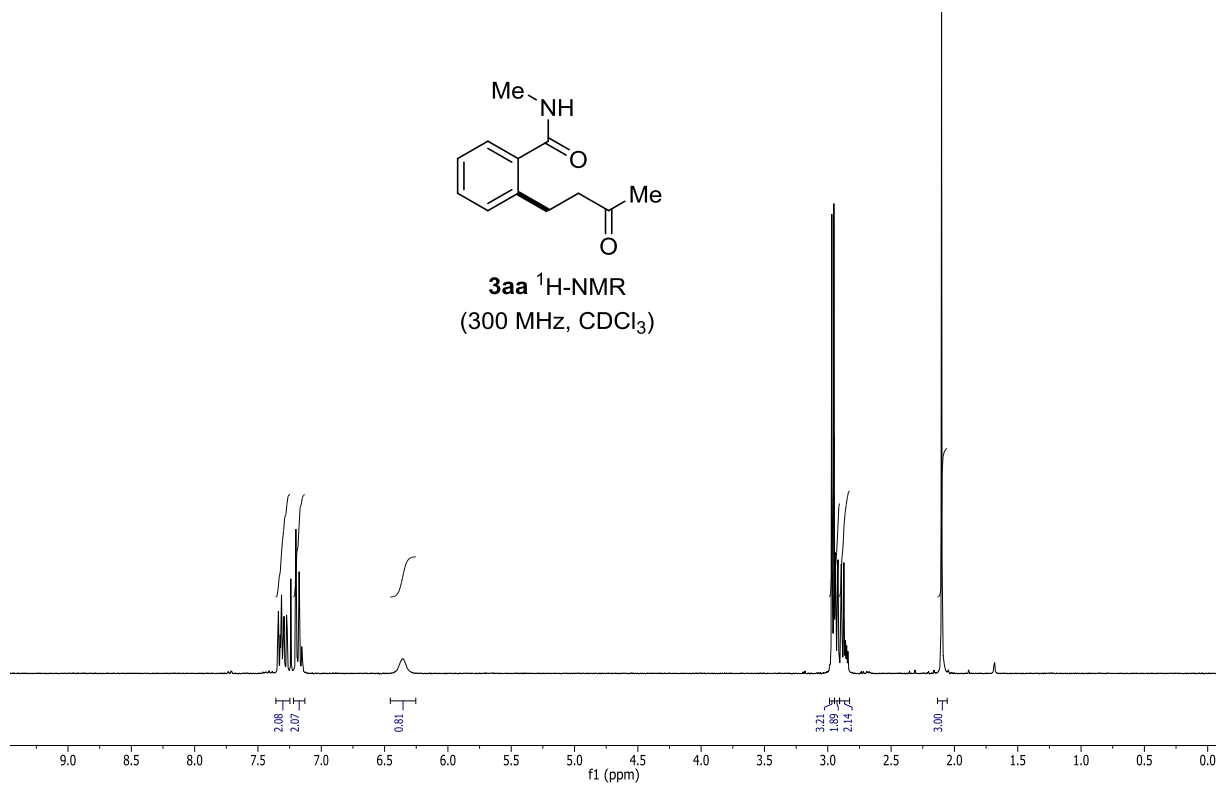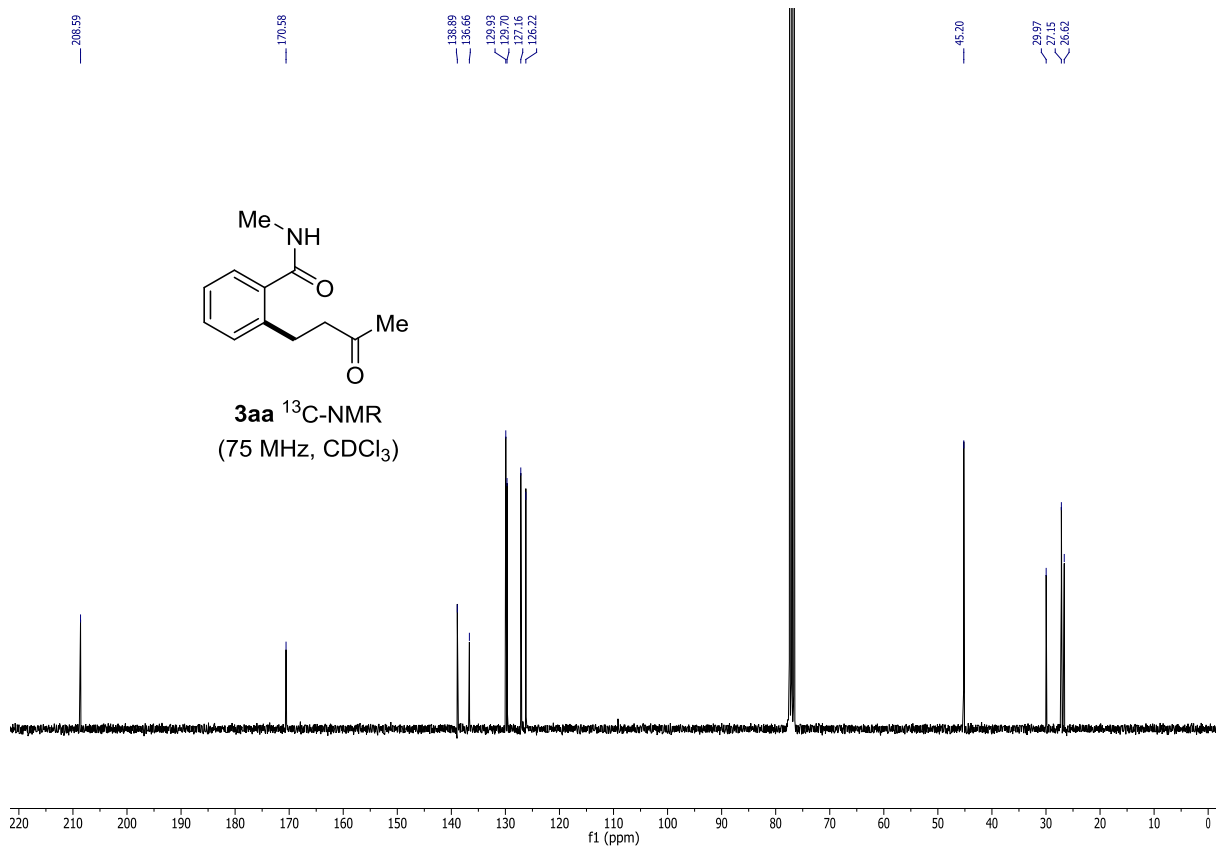

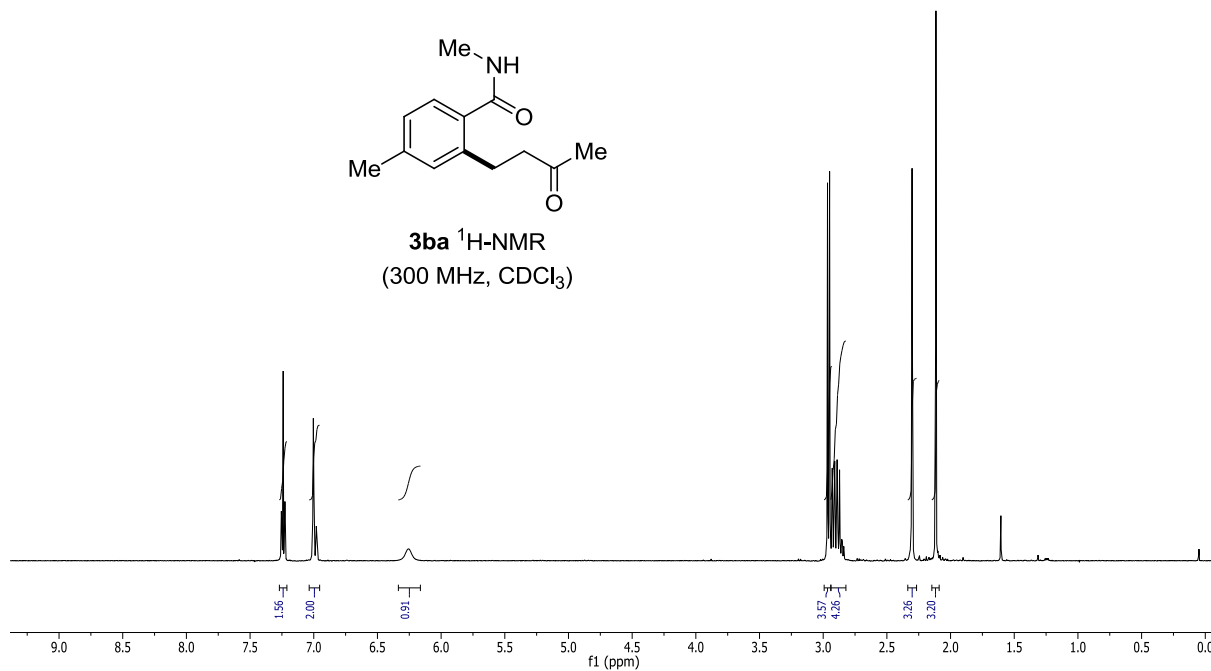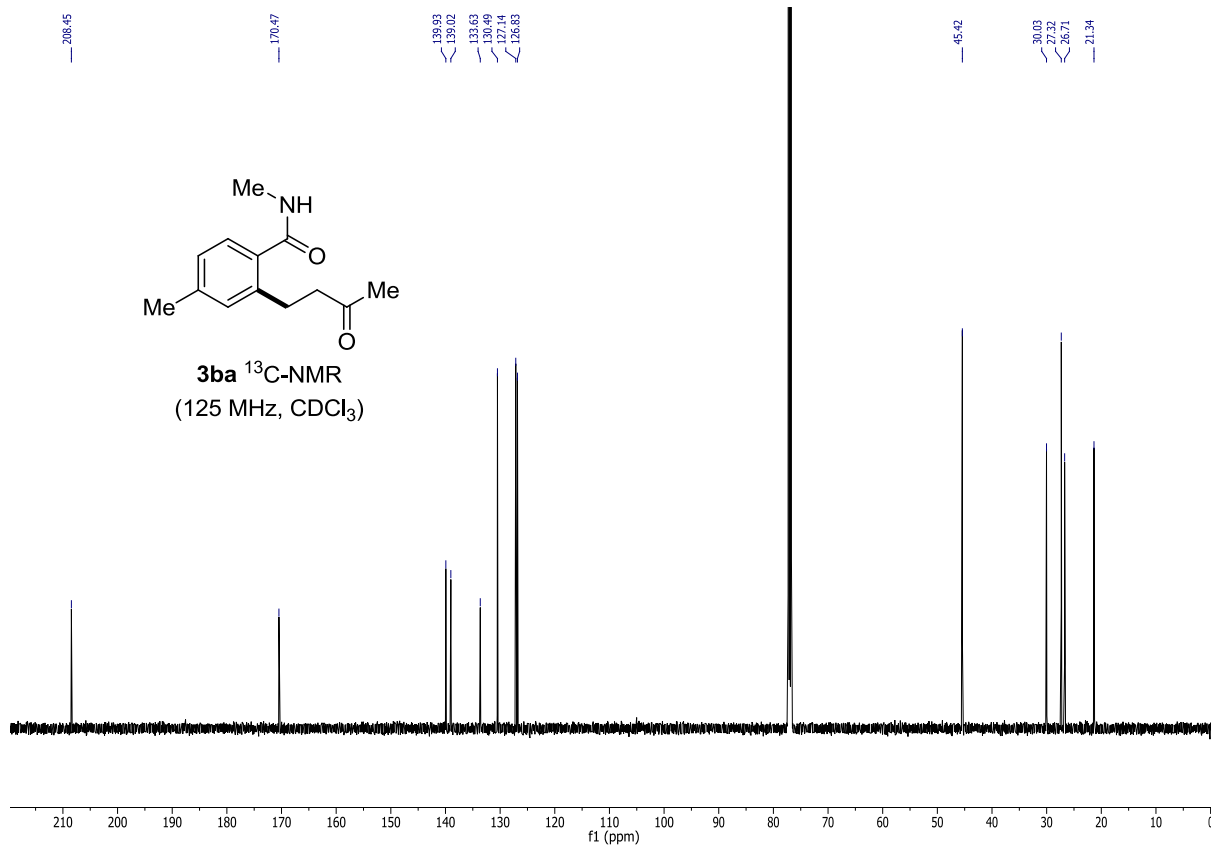



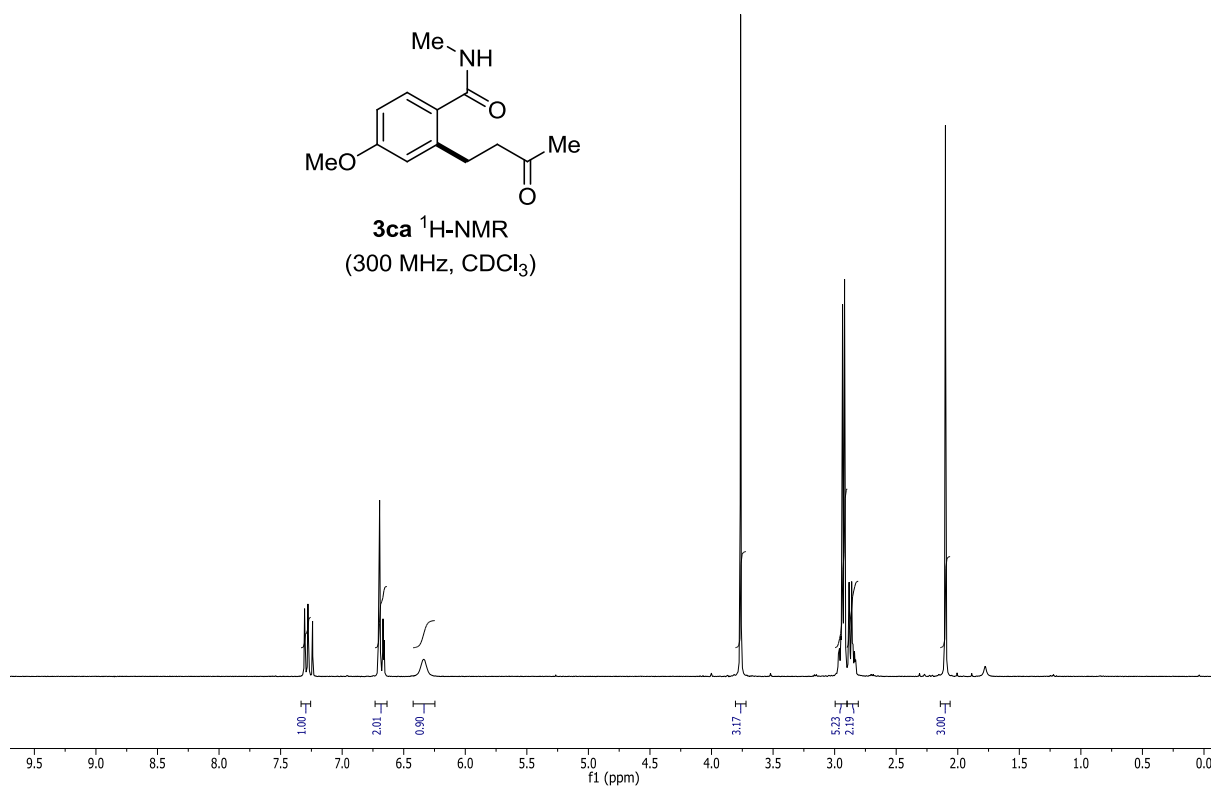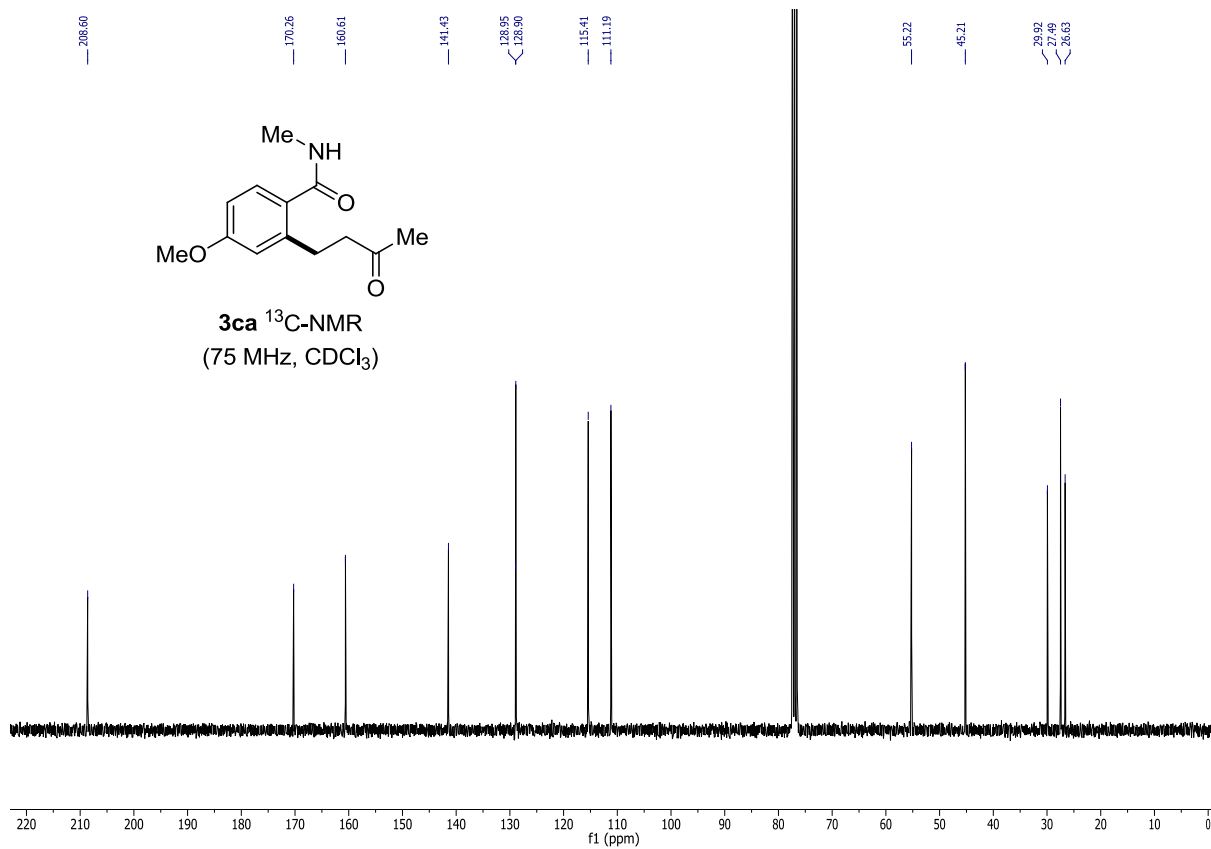

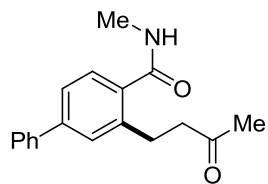

**3da**  $^1\text{H-NMR}$   
(300 MHz,  $\text{CDCl}_3$ )

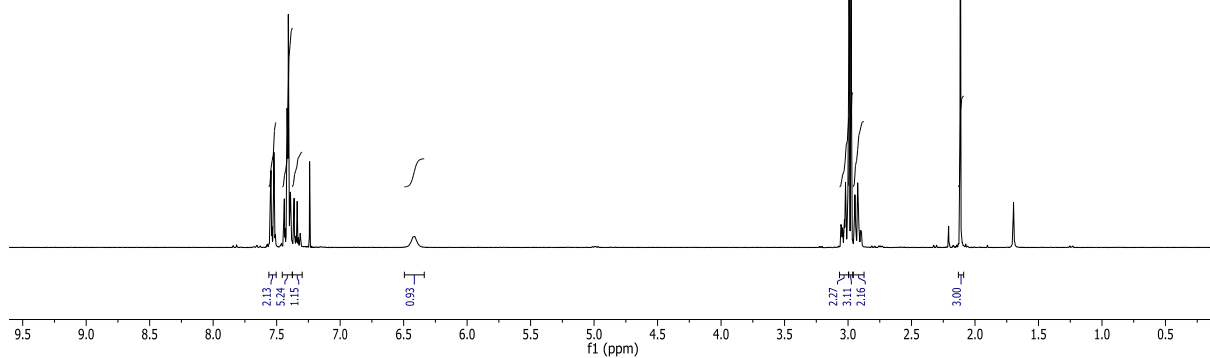

208.45

170.36

142.79  
140.13  
139.60  
138.74  
138.29  
128.56  
127.74  
127.72  
127.06  
124.92

45.26

29.92  
27.36  
26.63

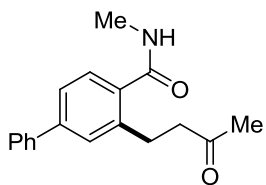

**3da**  $^{13}\text{C-NMR}$   
(75 MHz,  $\text{CDCl}_3$ )

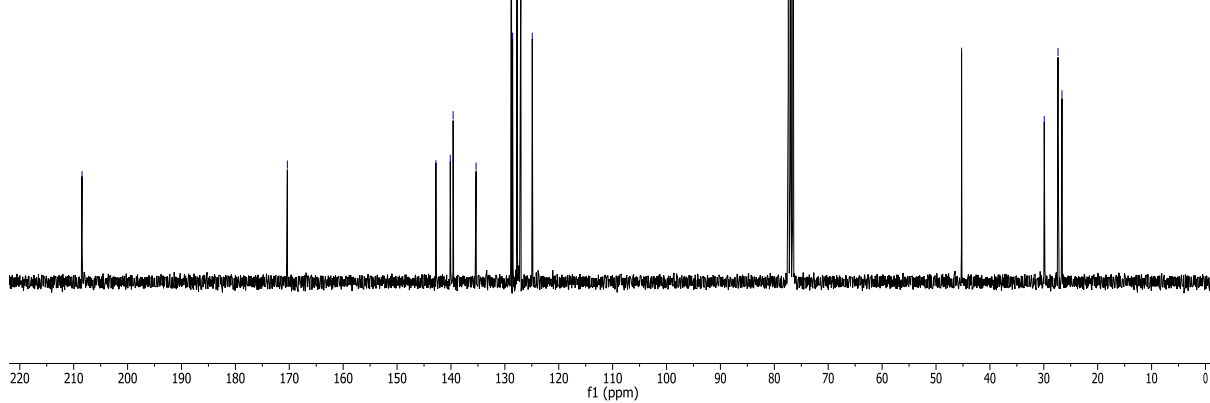

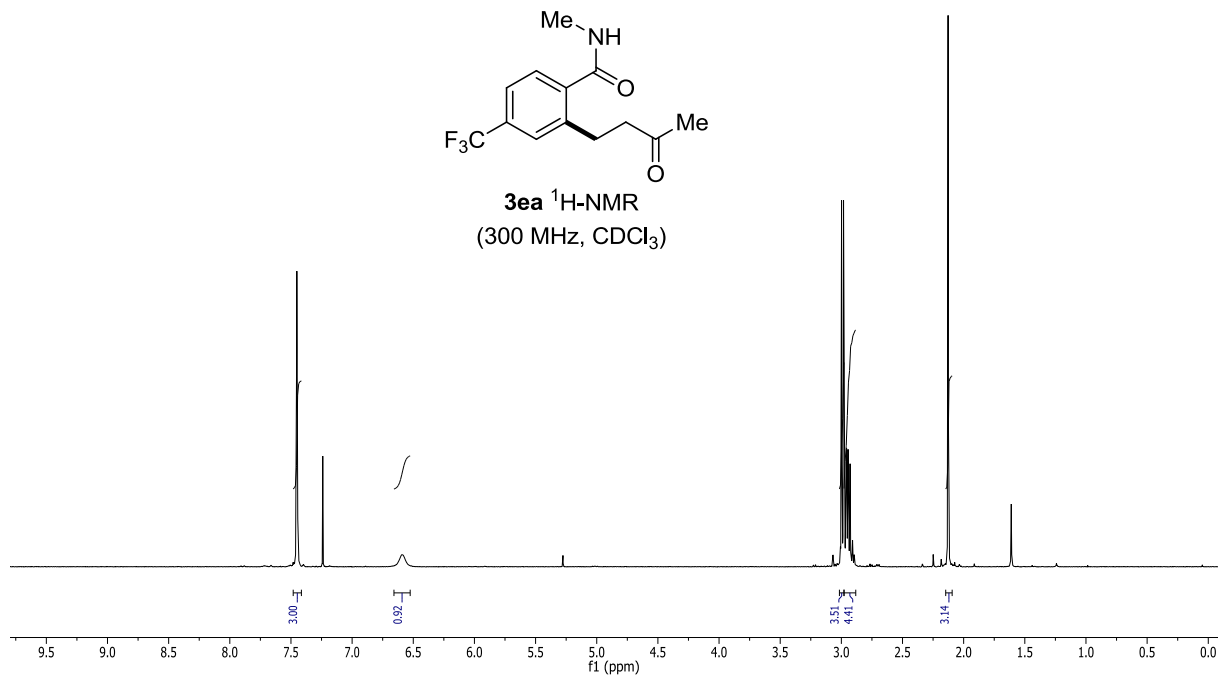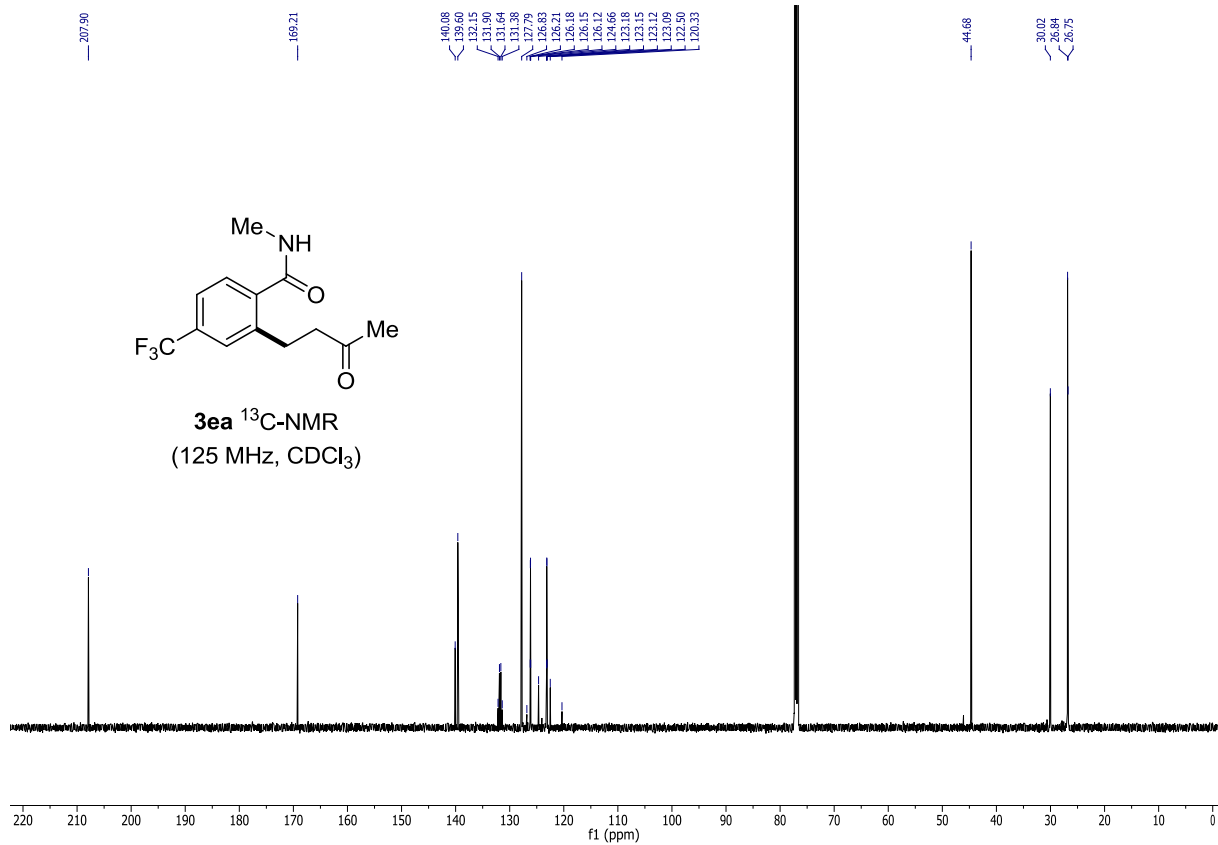

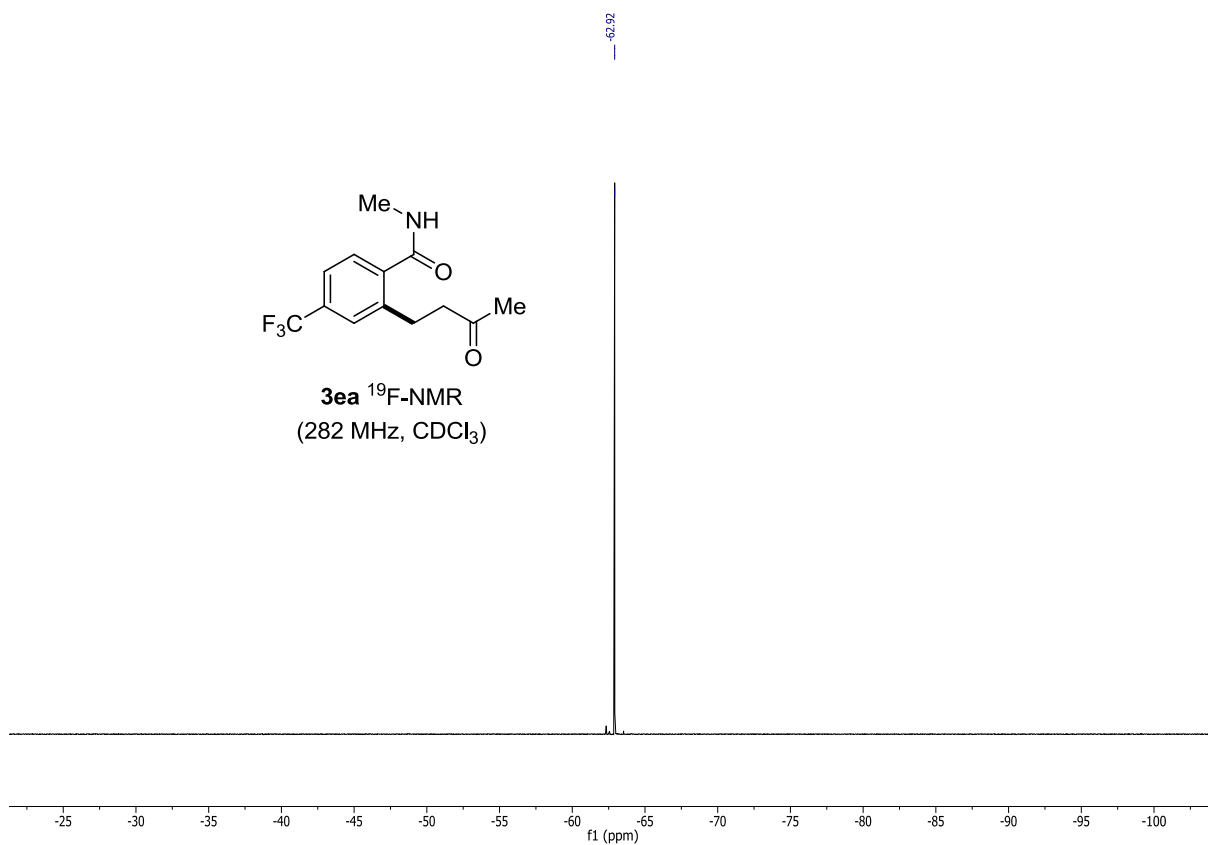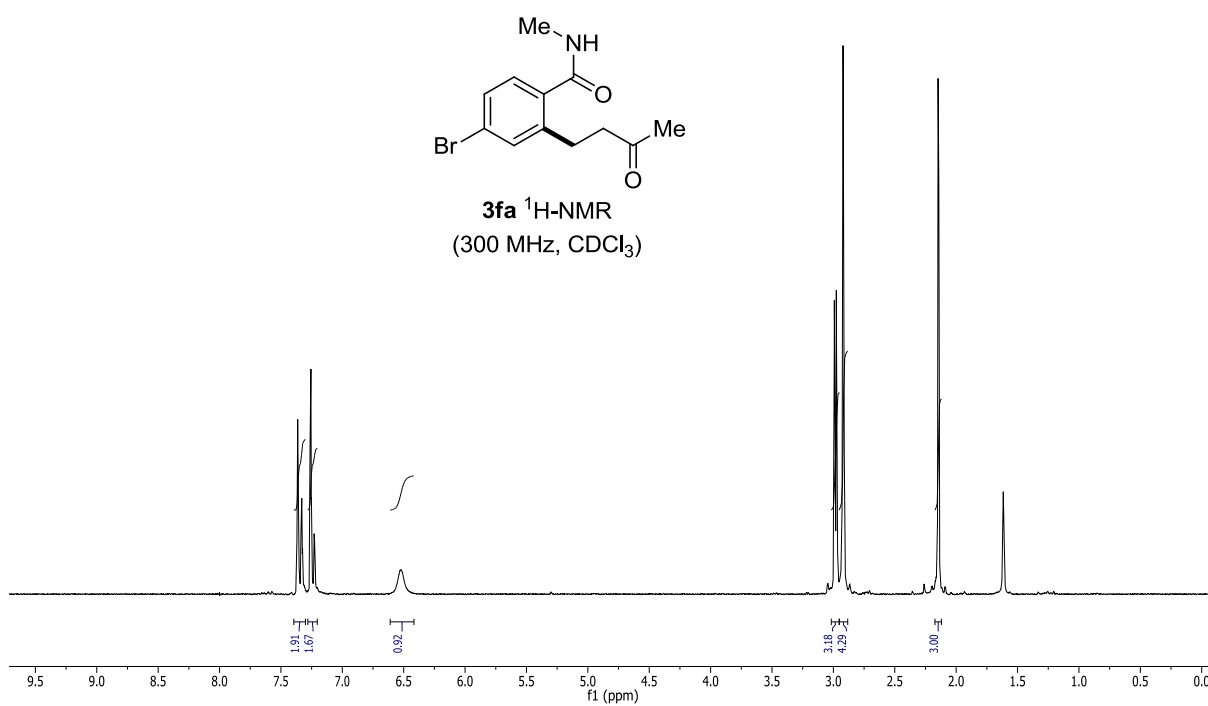

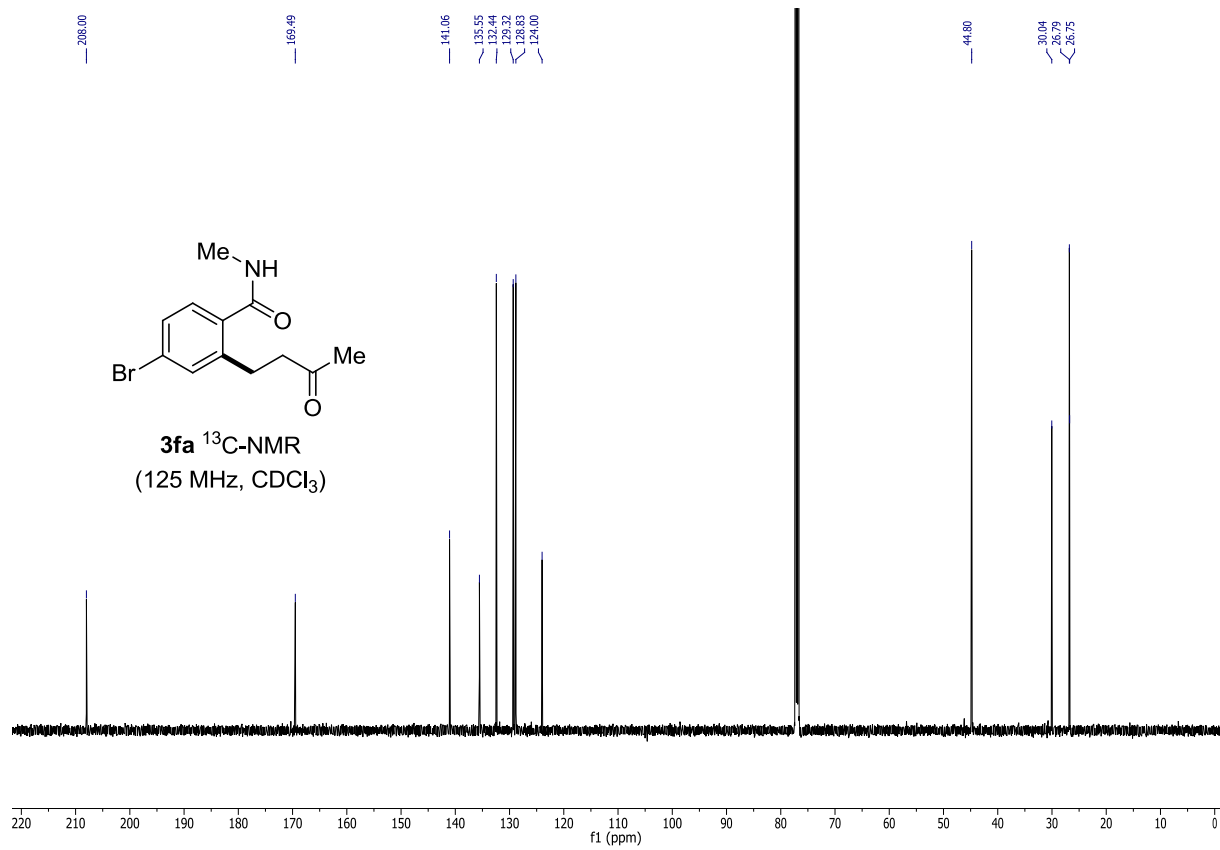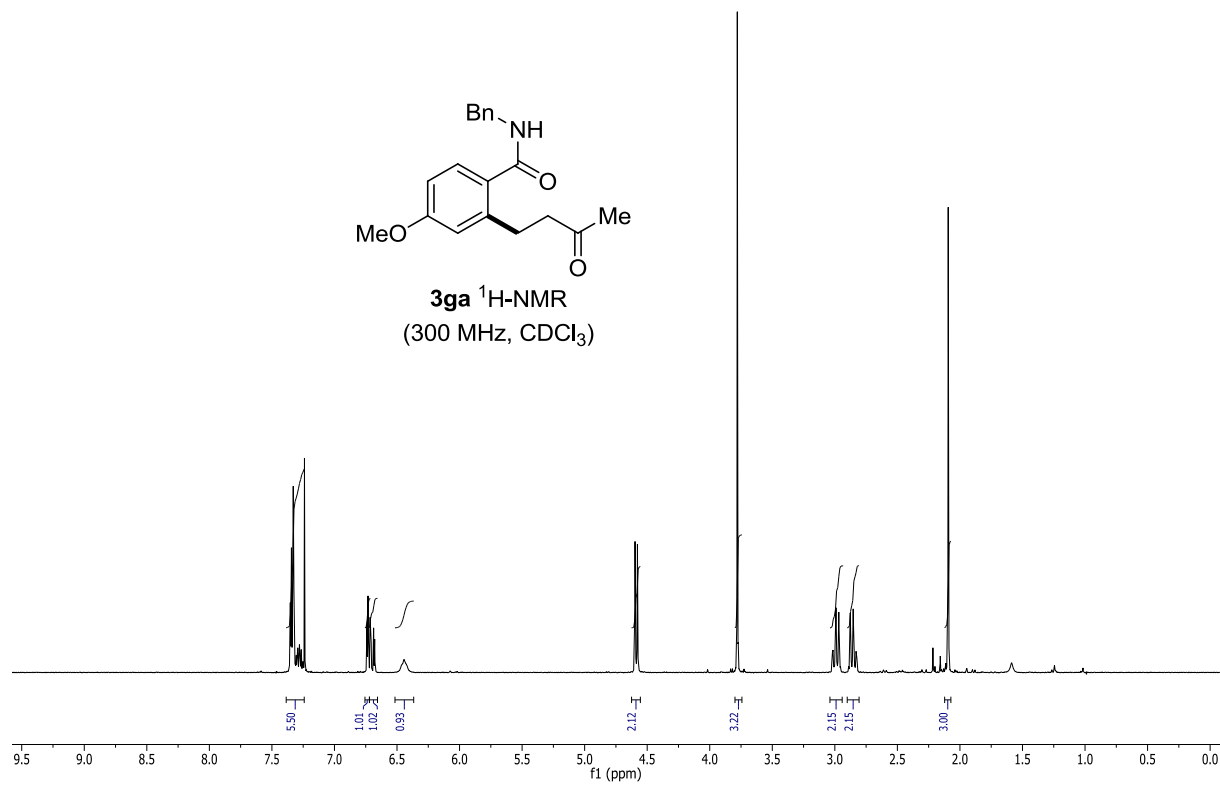

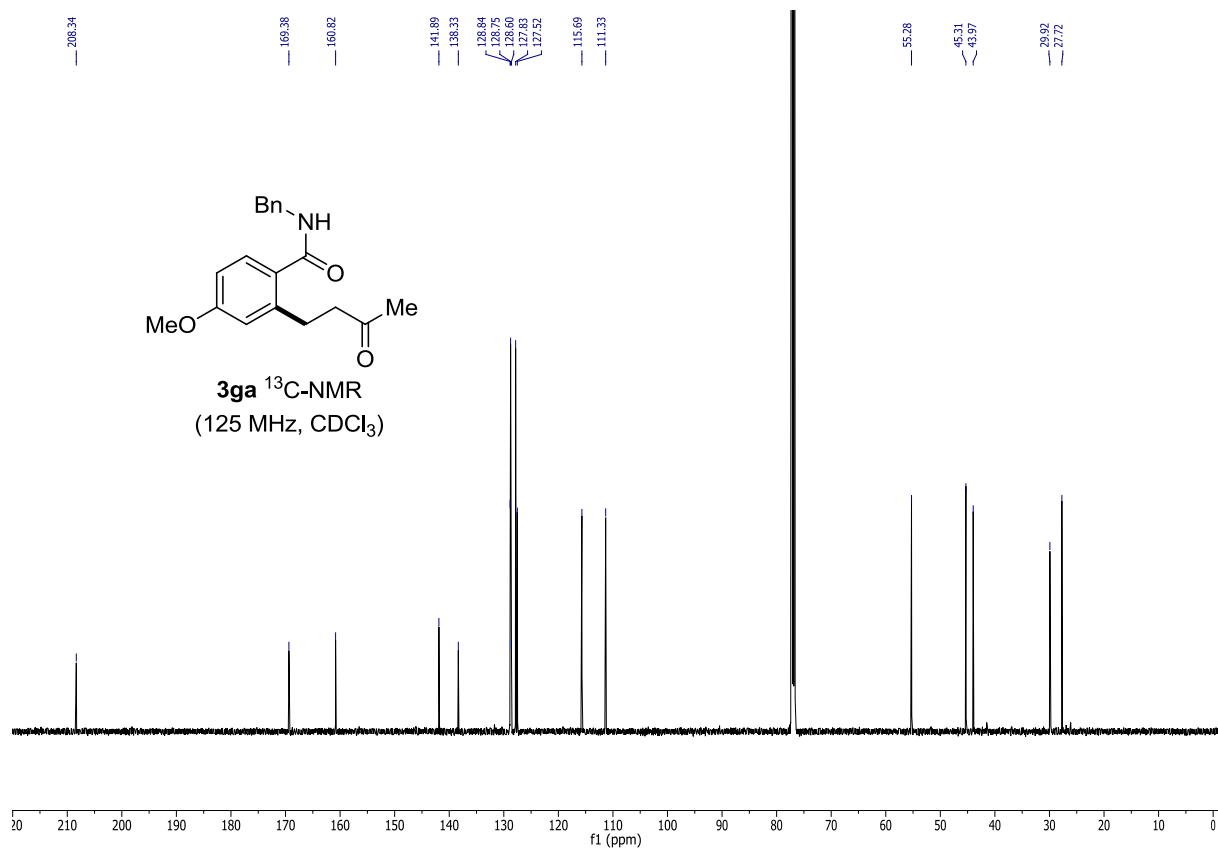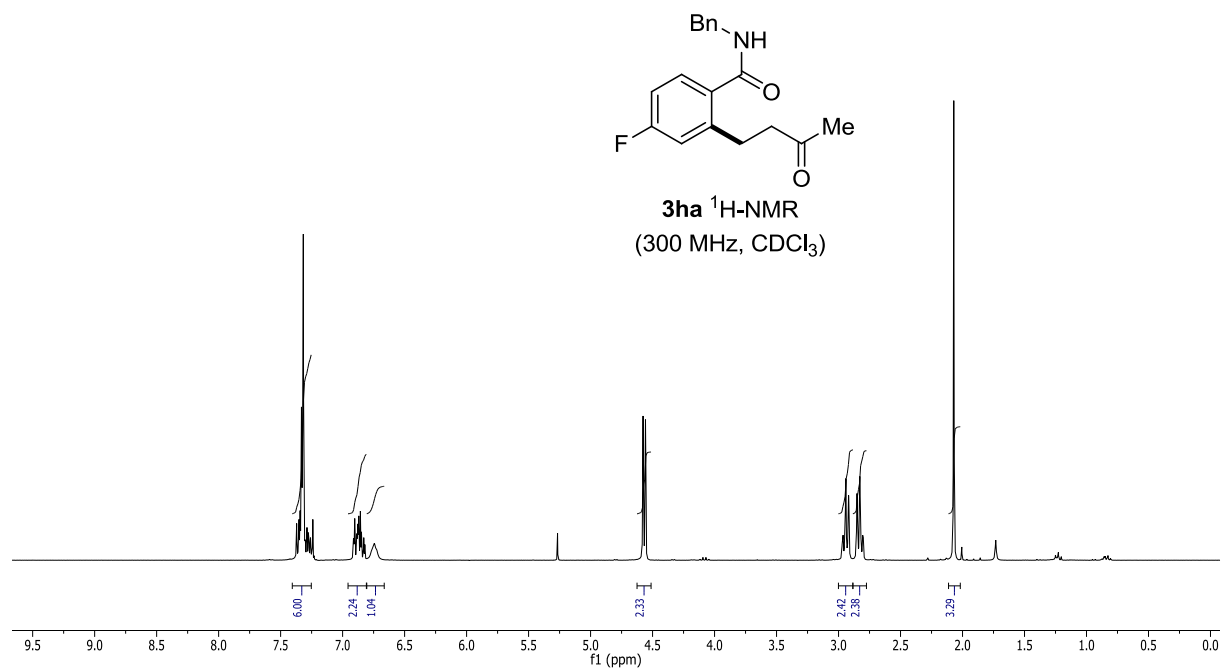

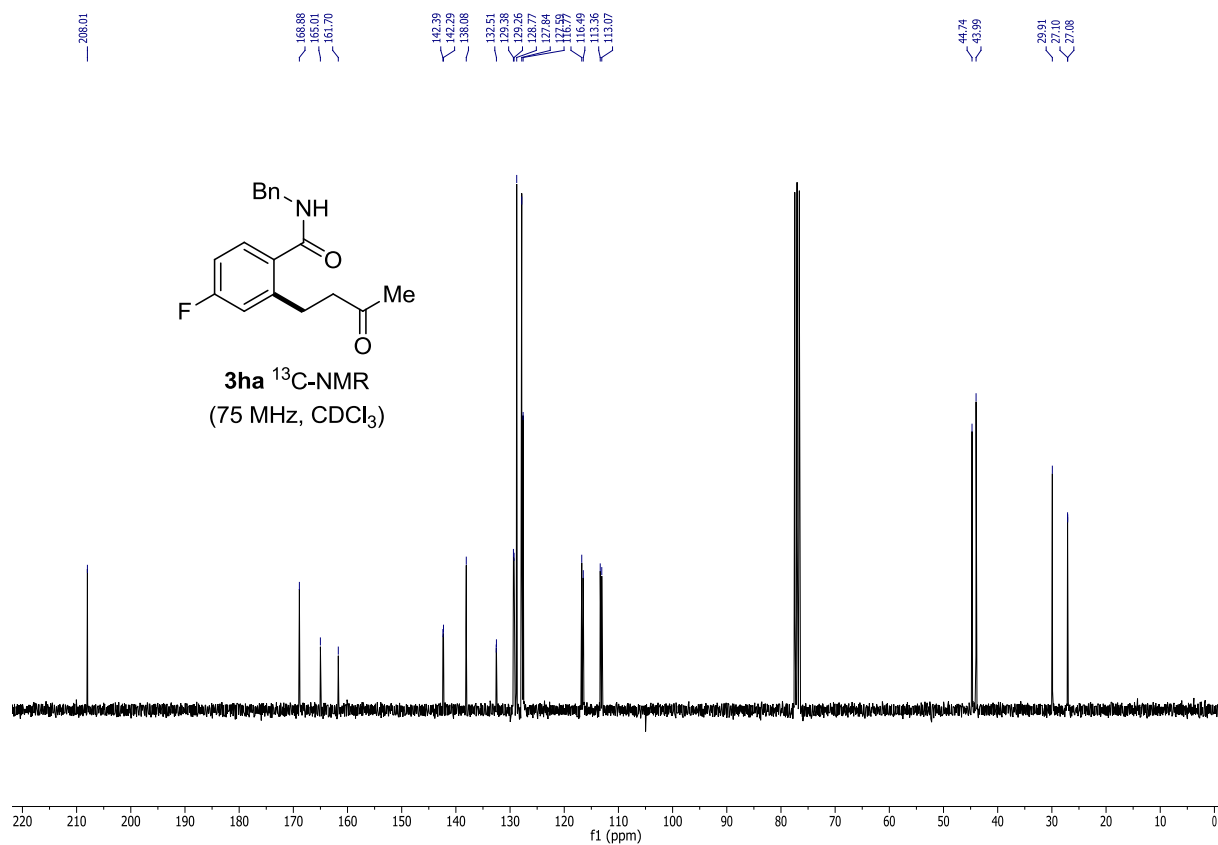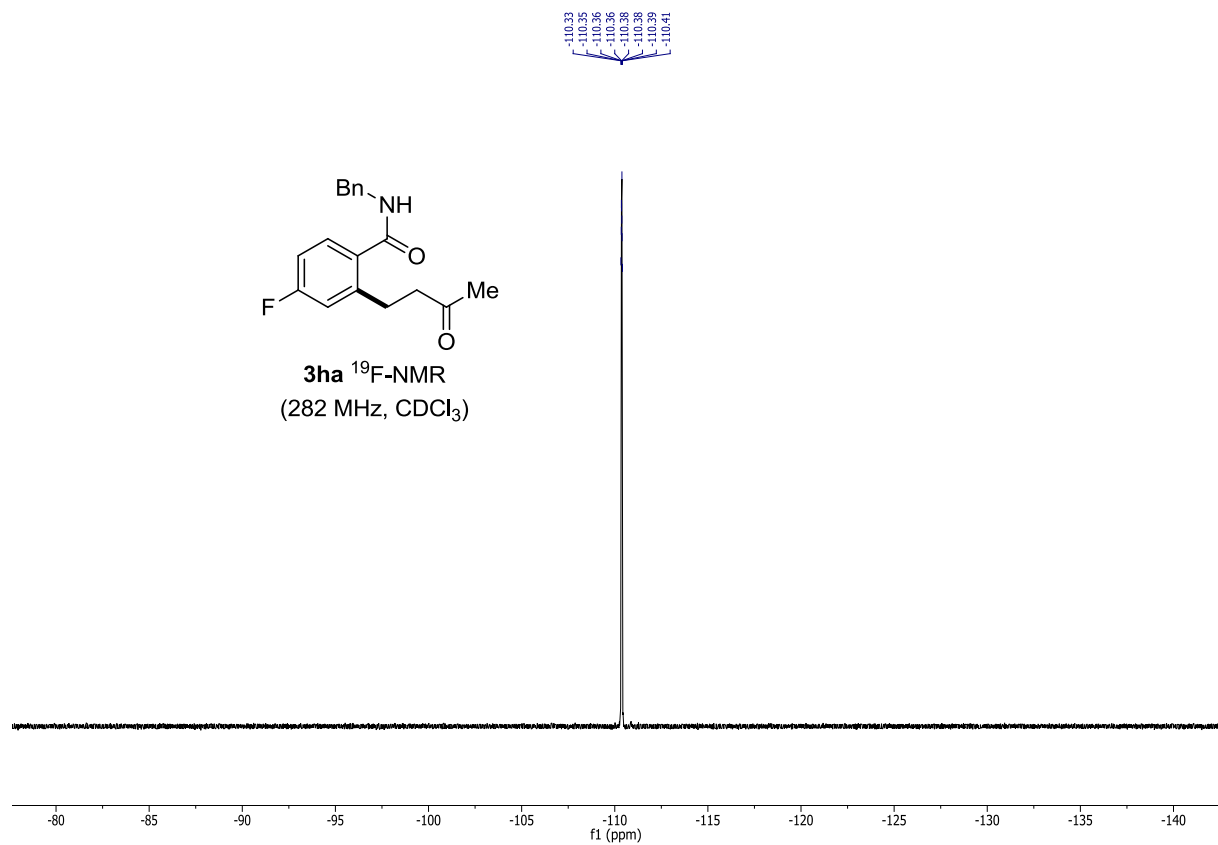

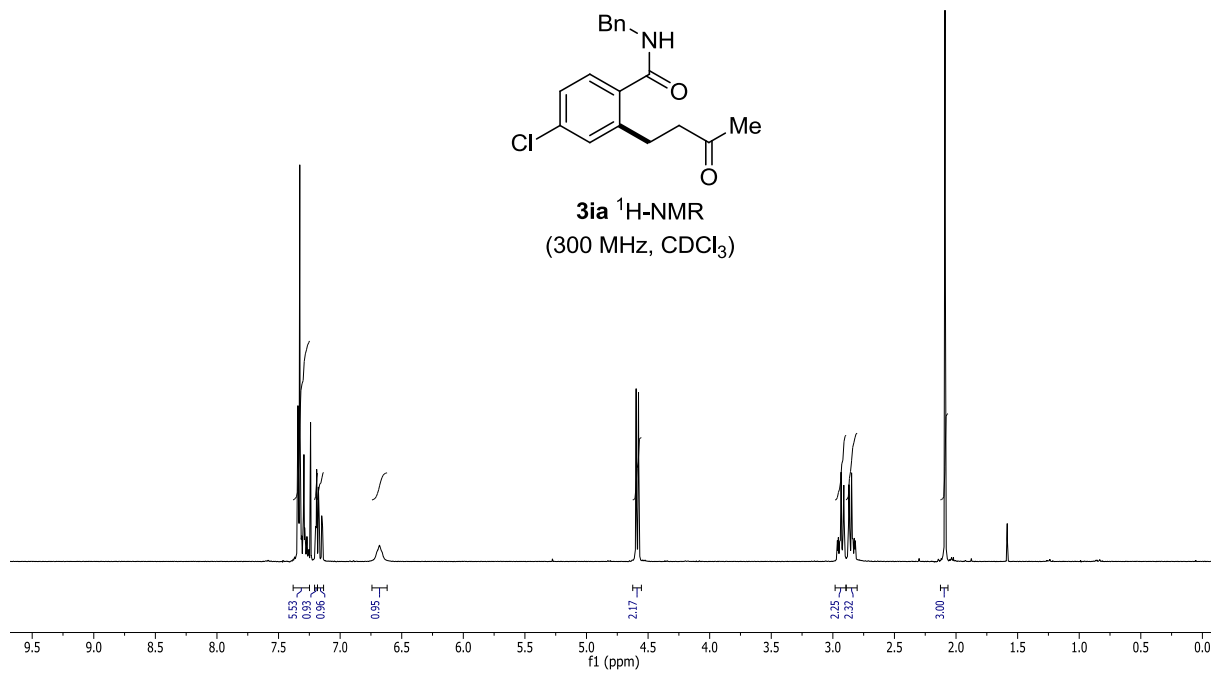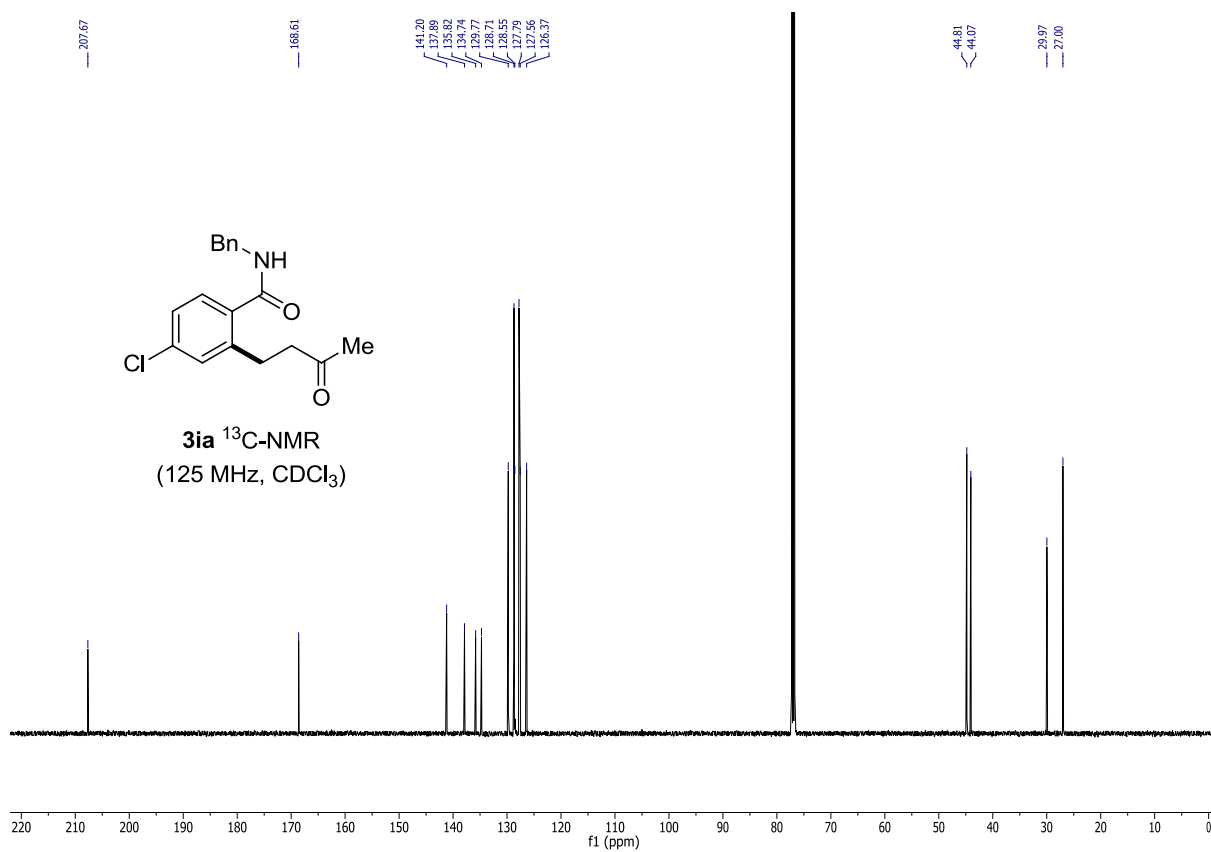



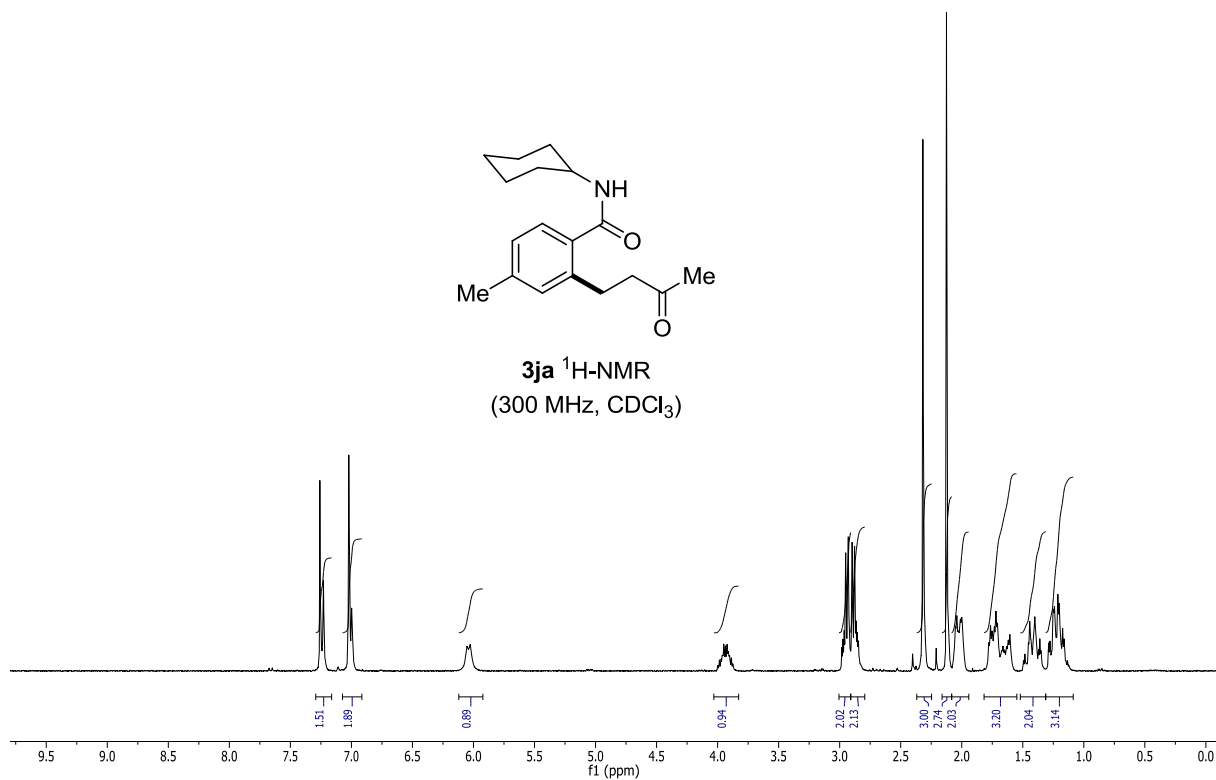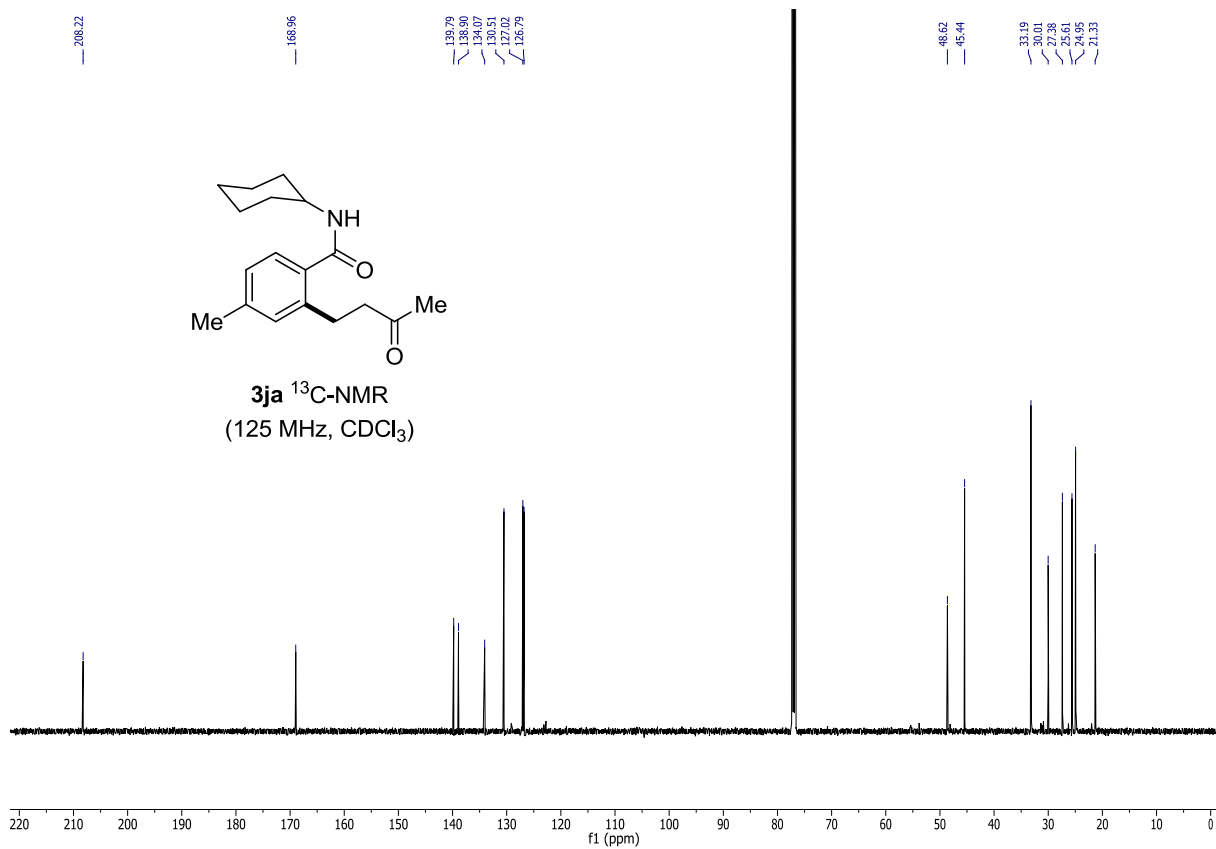

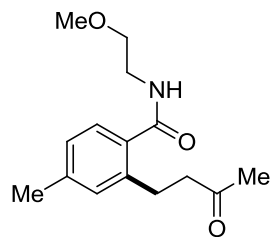

**3ka** <sup>1</sup>H-NMR  
(300 MHz, CDCl<sub>3</sub>)

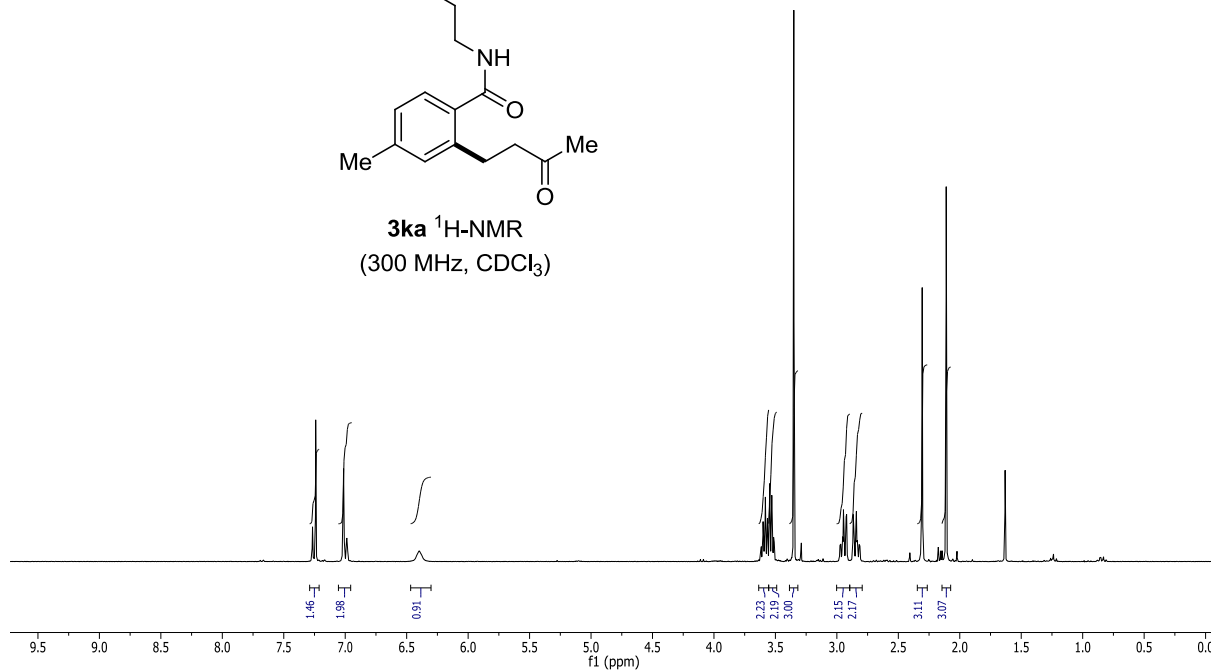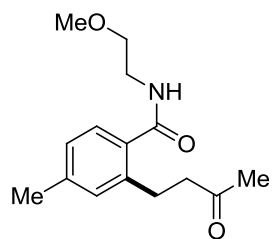

**3ka** <sup>13</sup>C-NMR  
(125 MHz, CDCl<sub>3</sub>)

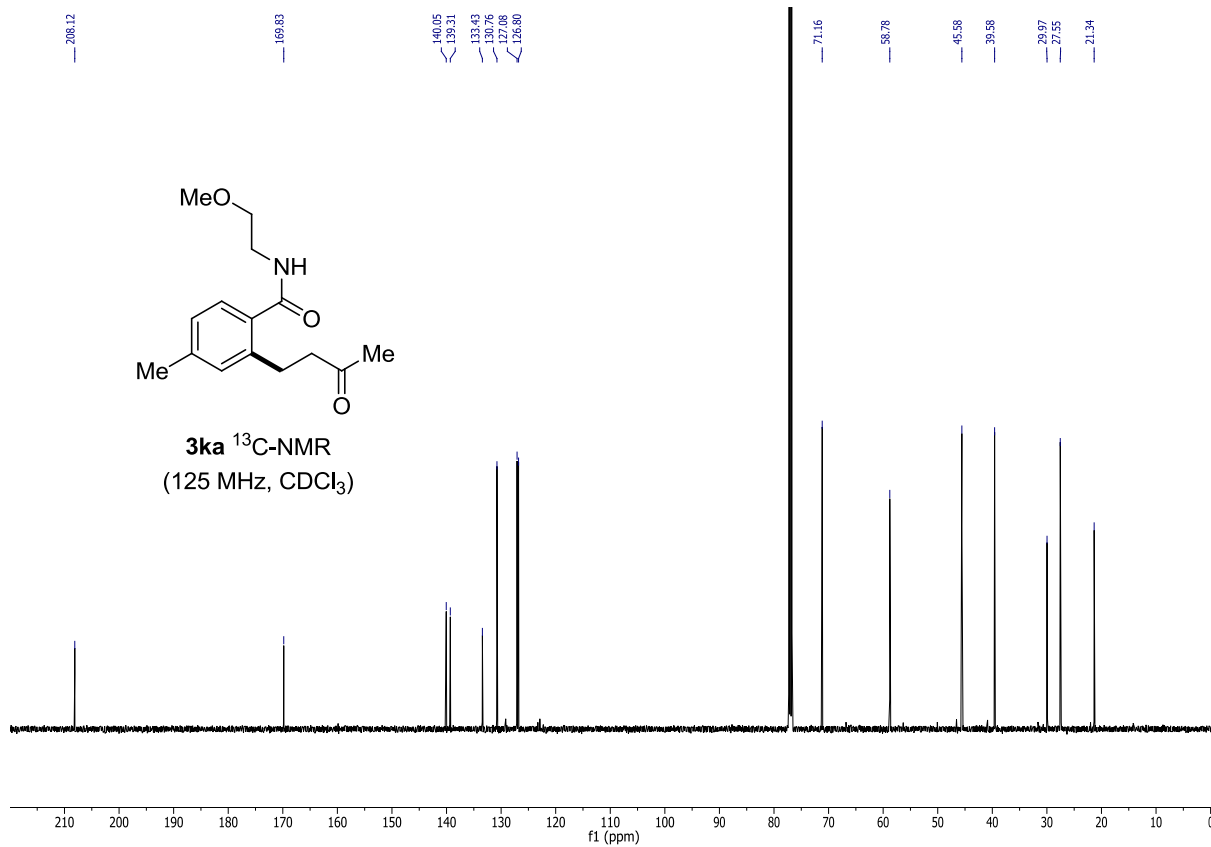

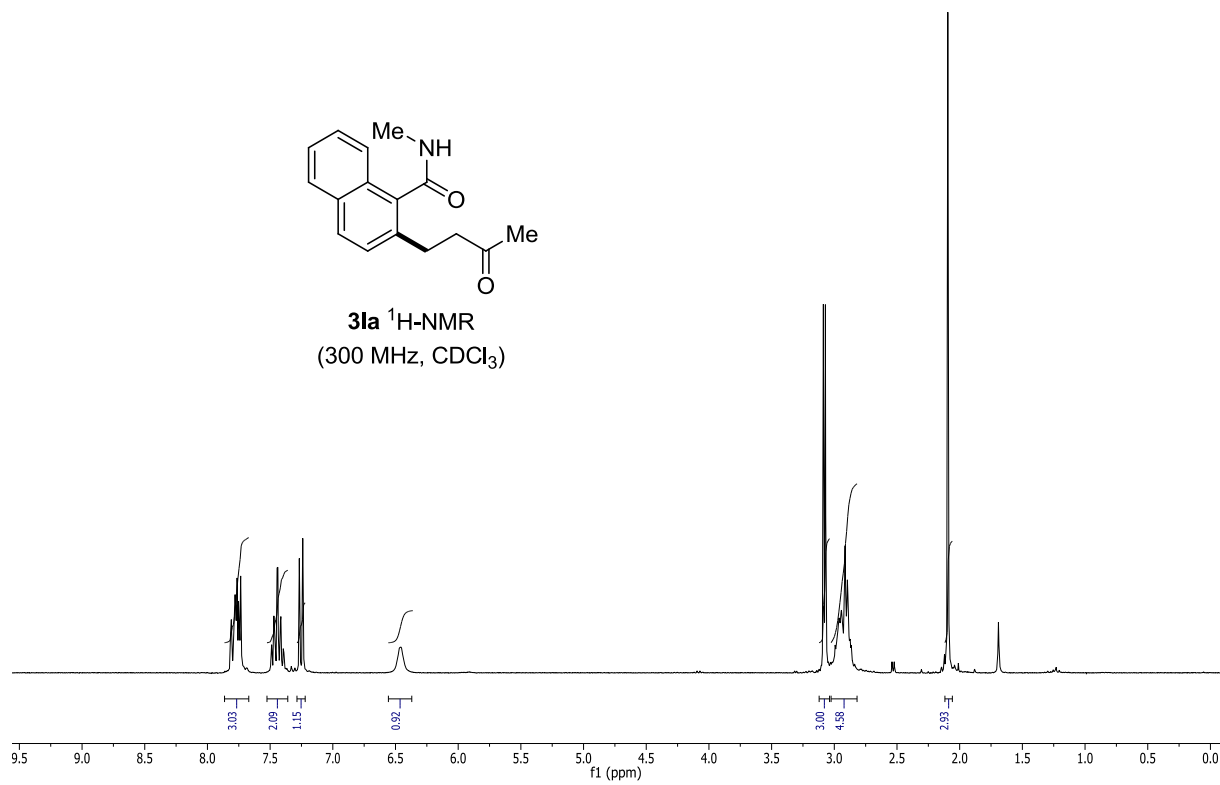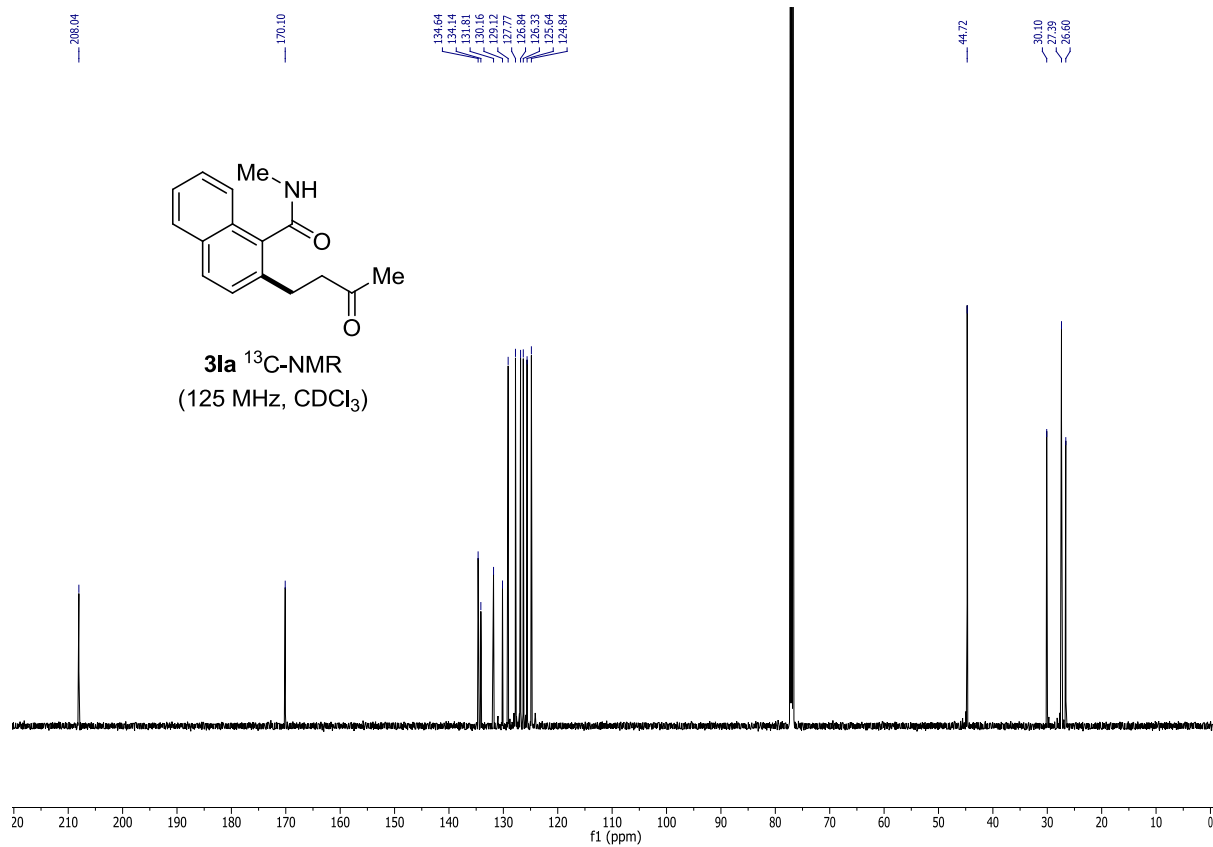

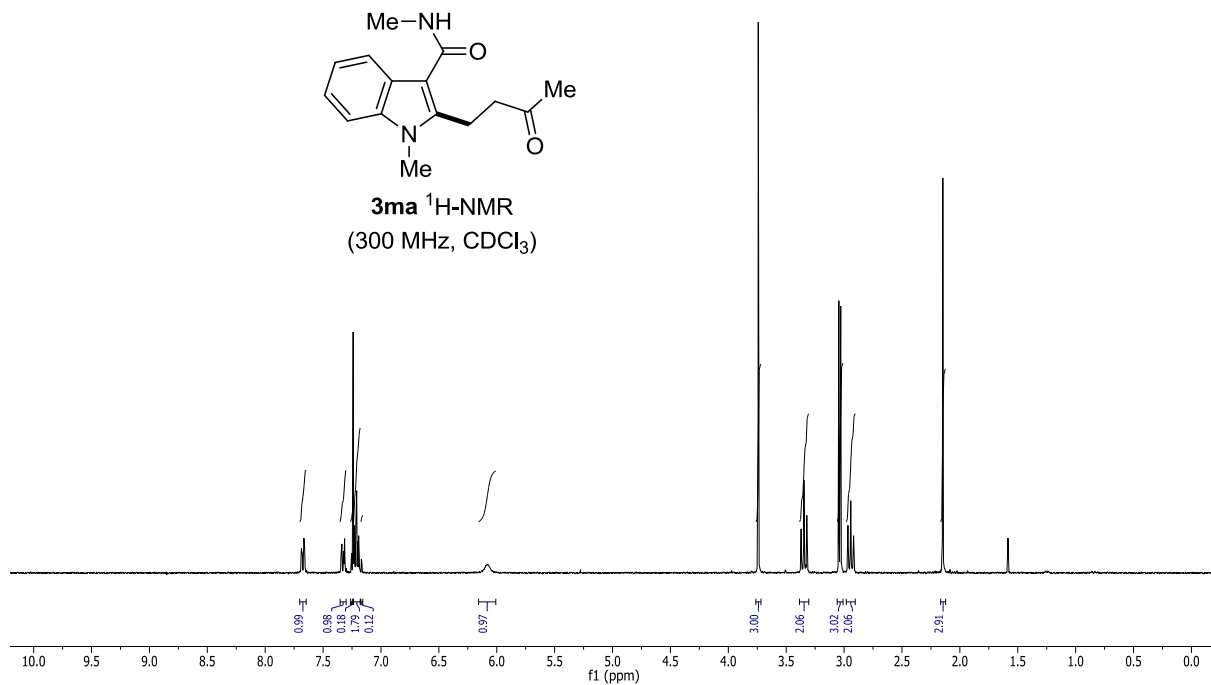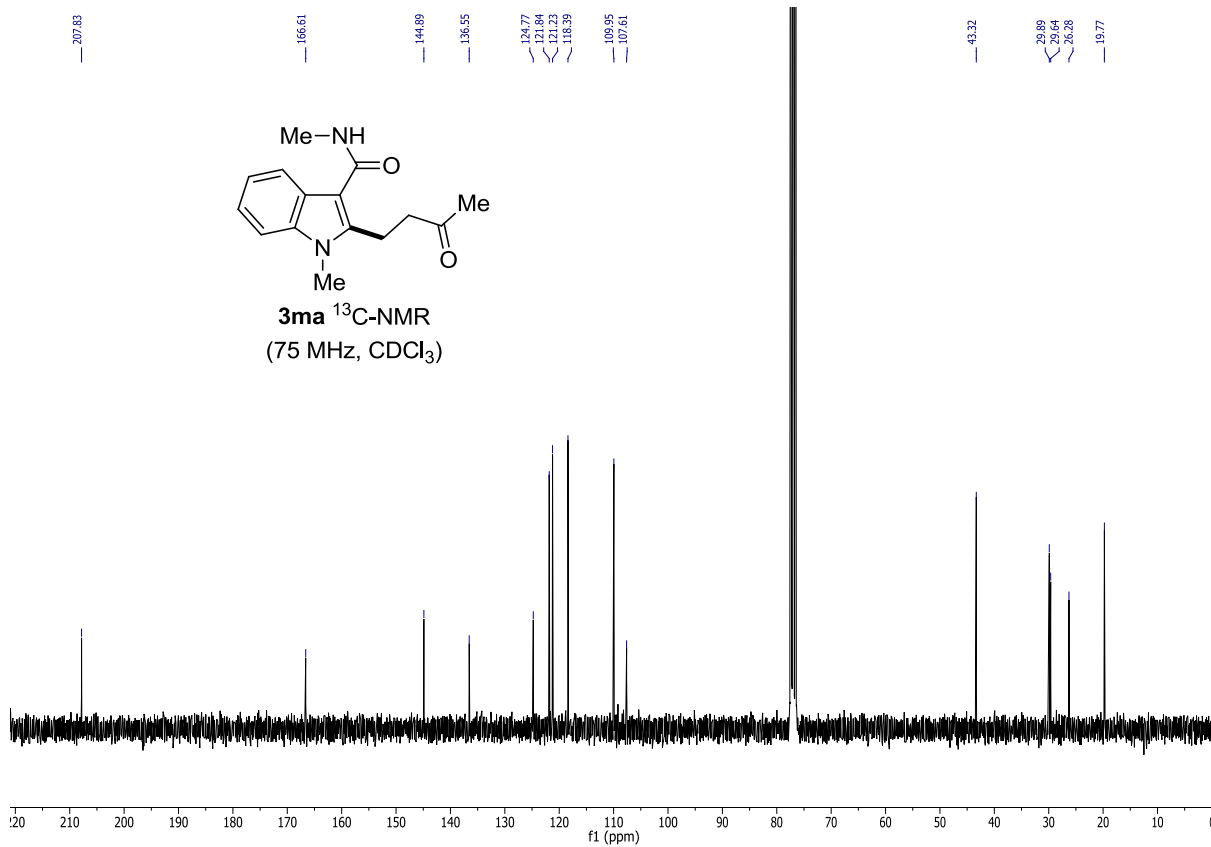

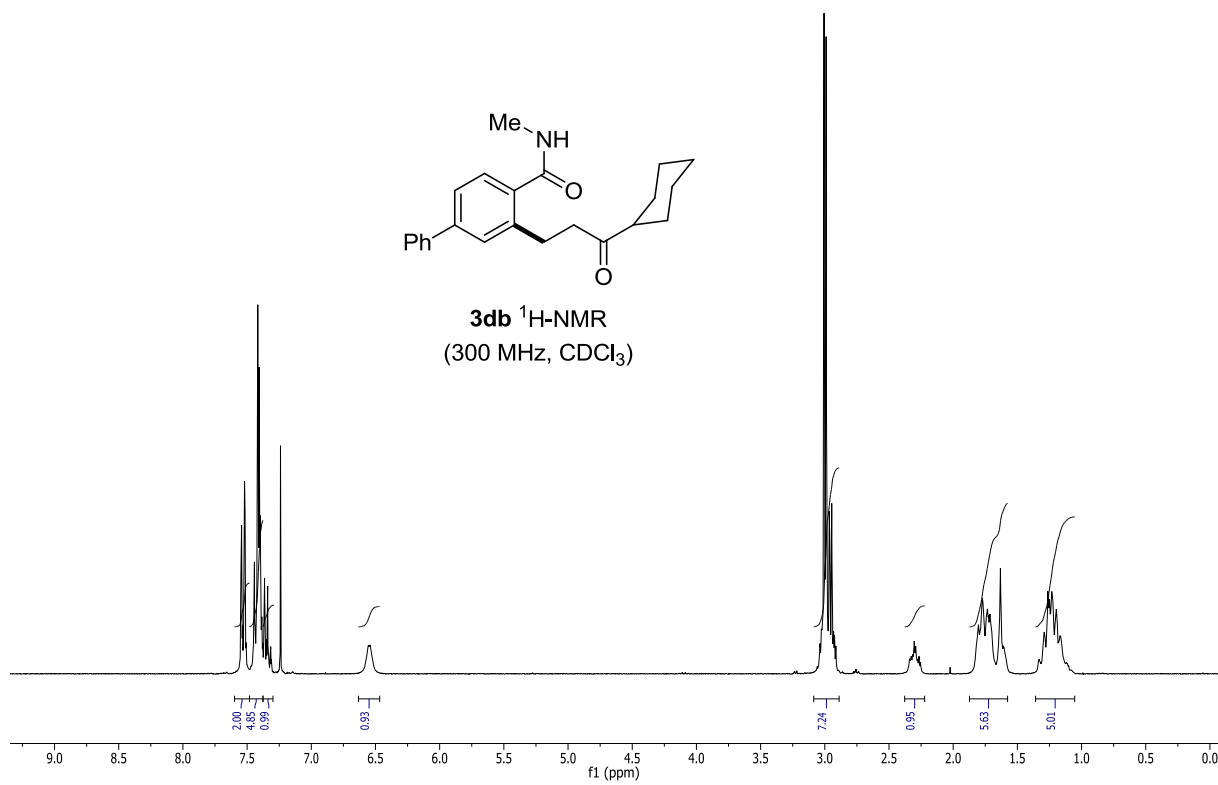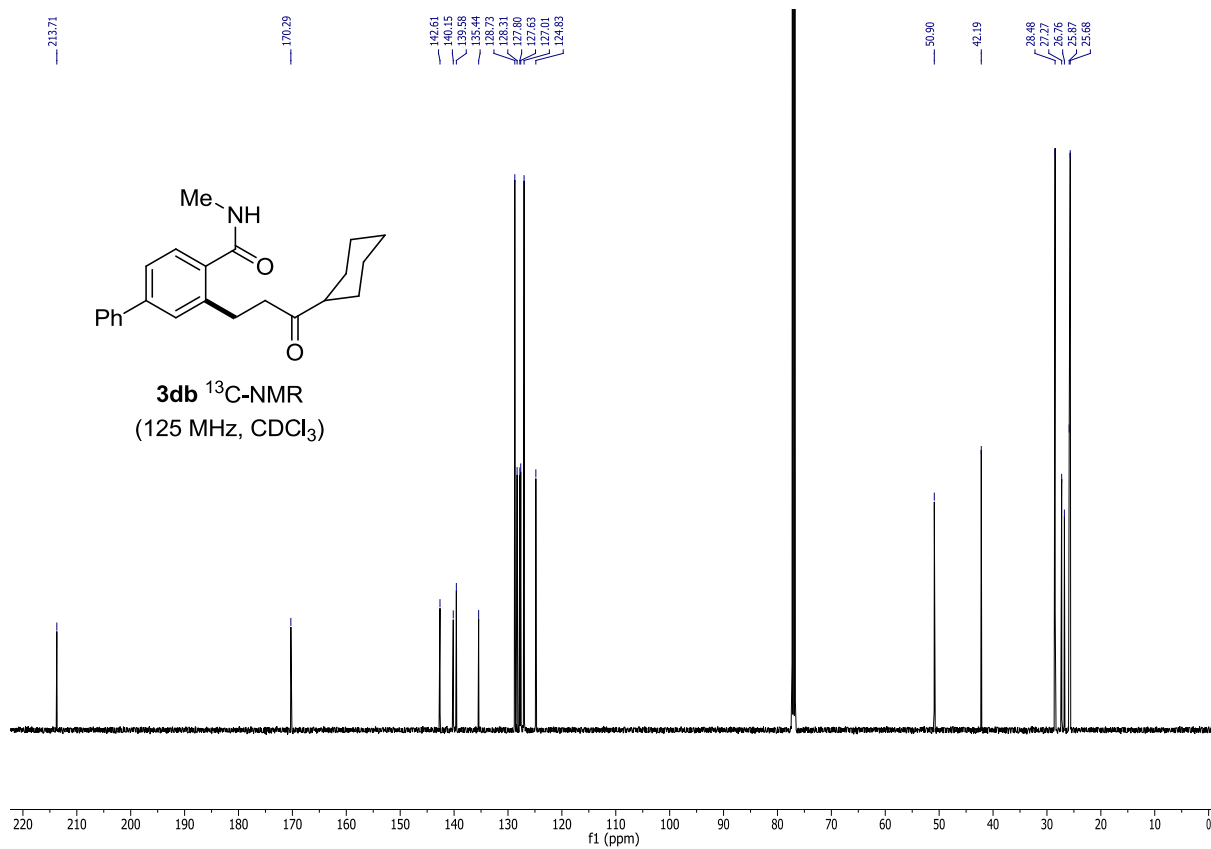

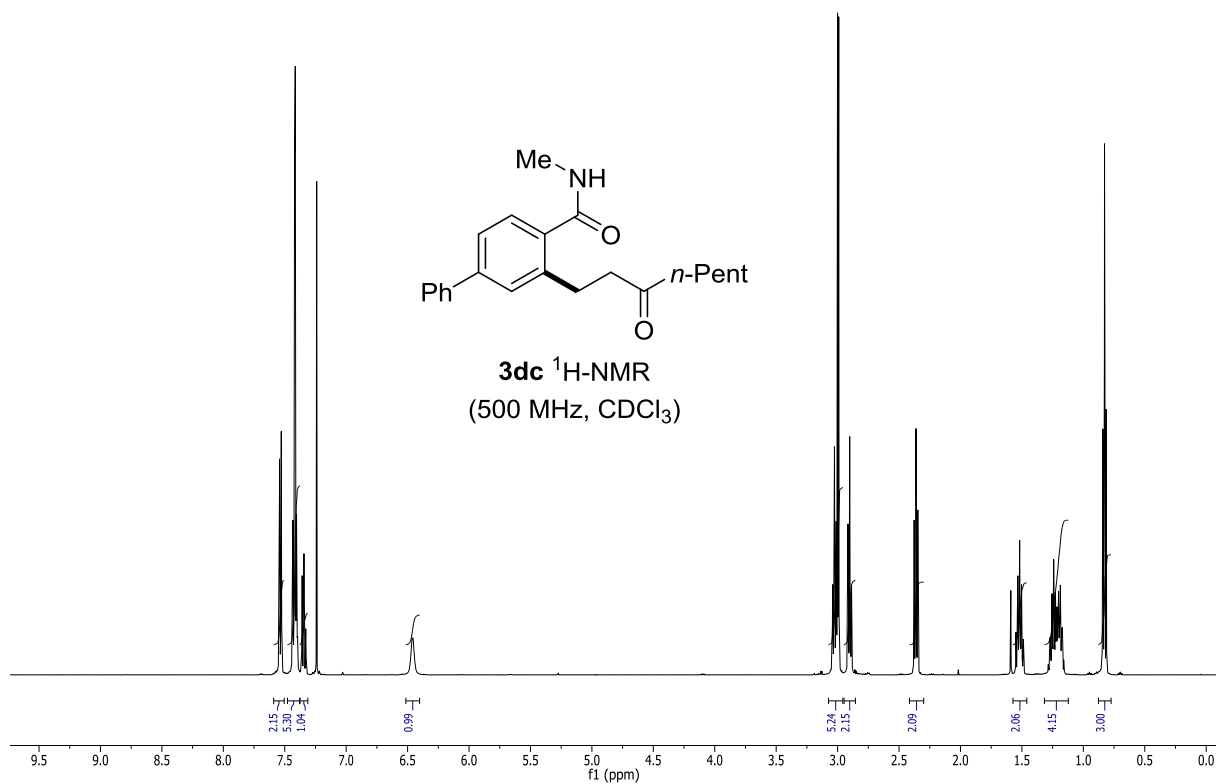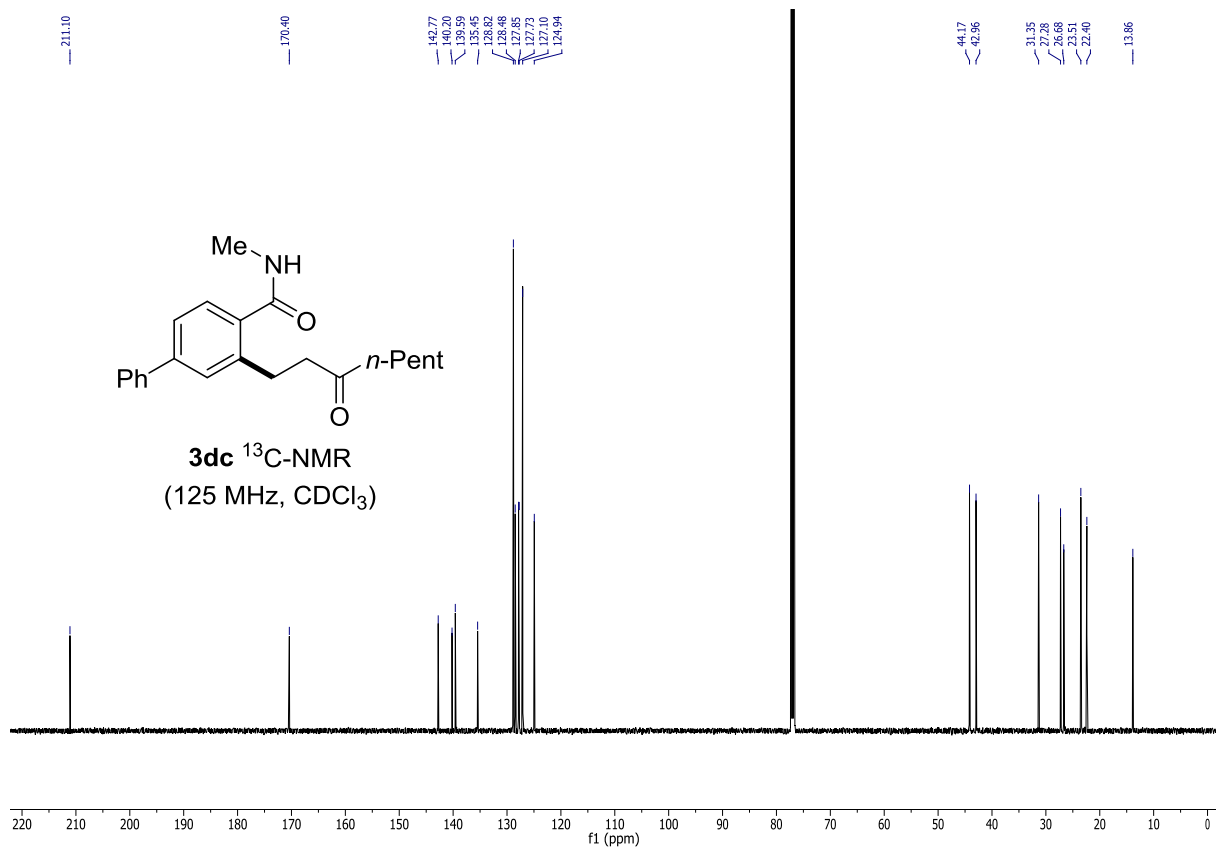

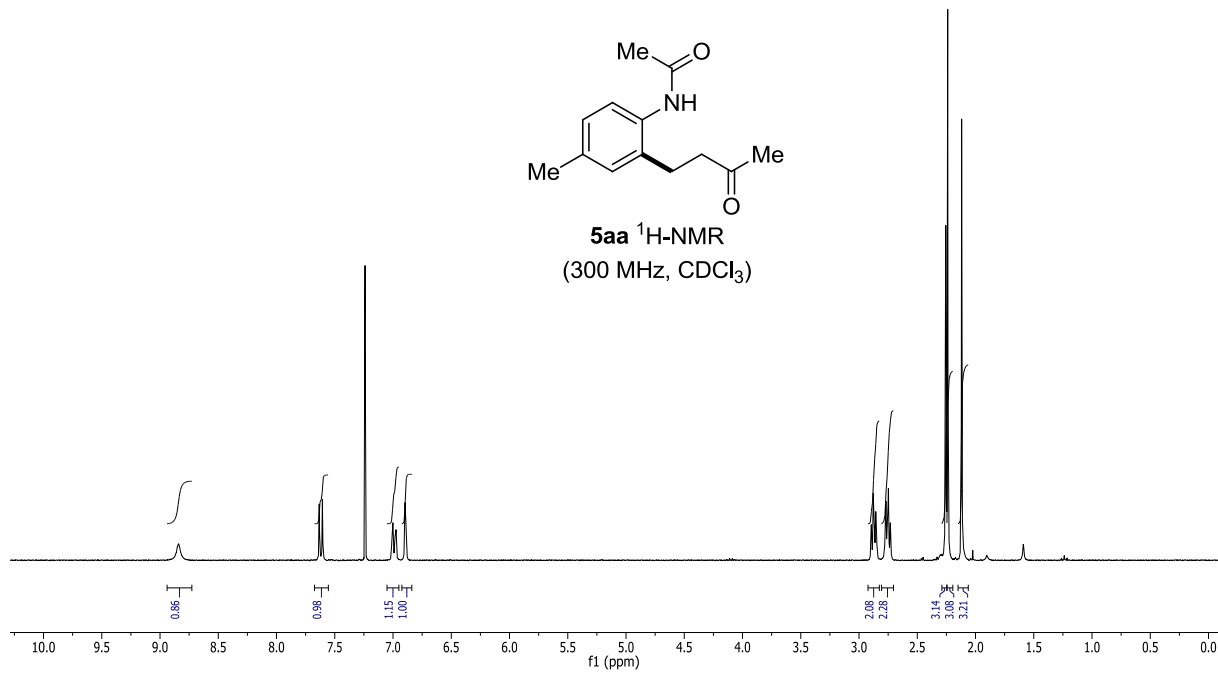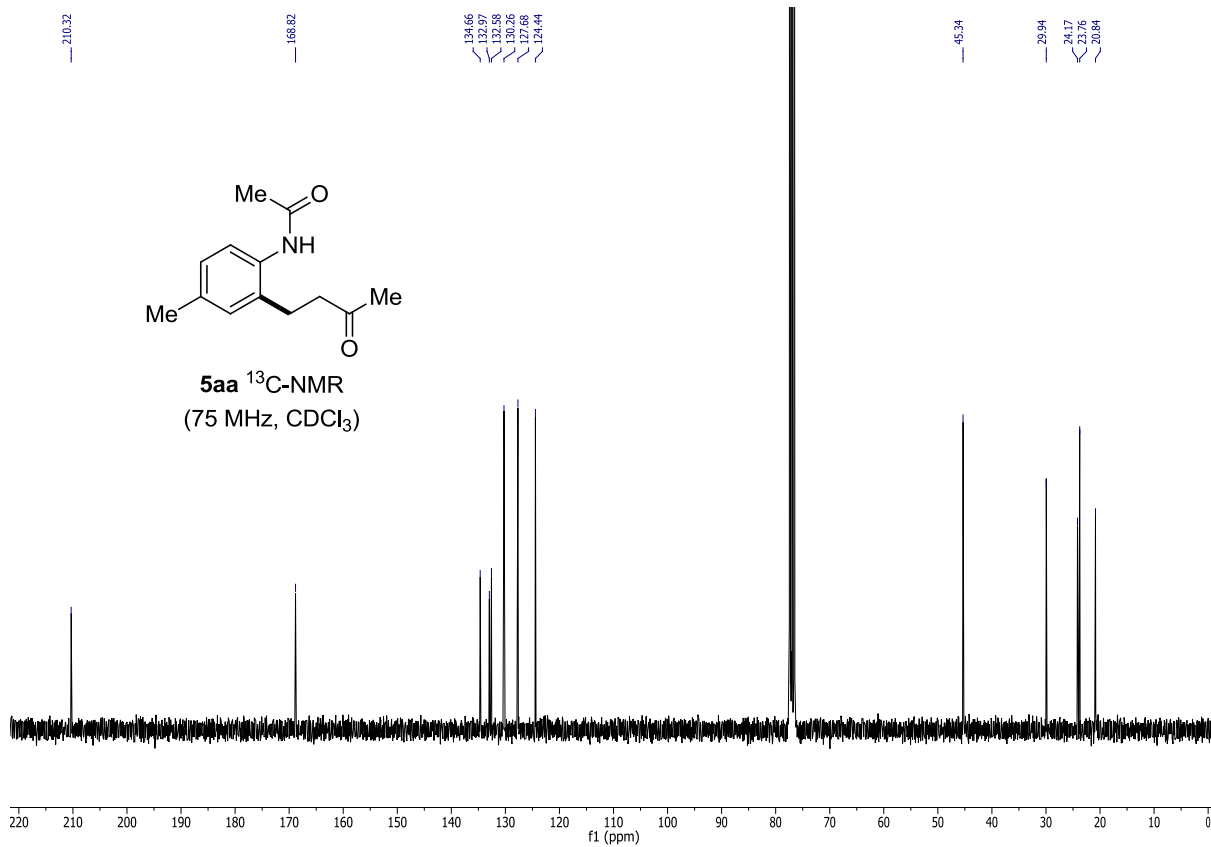

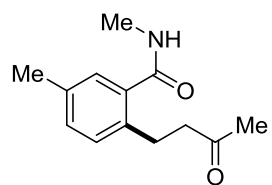

**3na** <sup>1</sup>H-NMR  
(300 MHz, CDCl<sub>3</sub>)

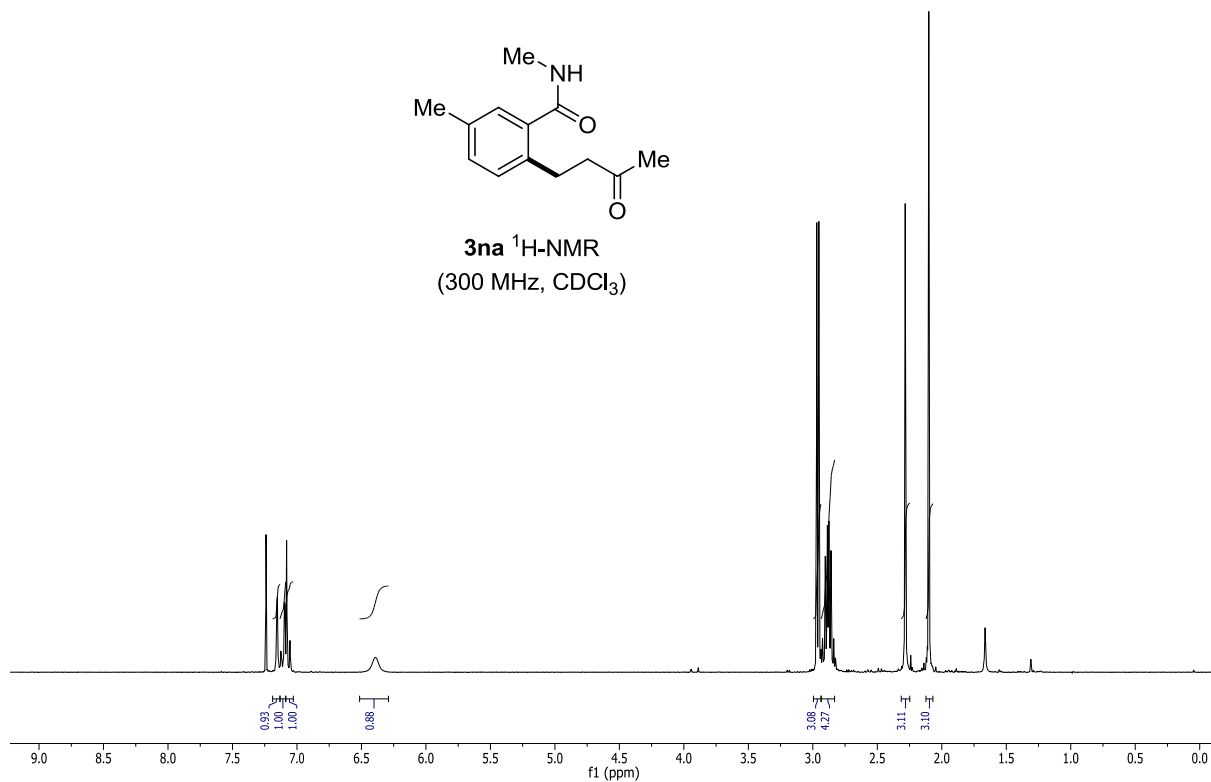

208.00  
169.49  
141.06  
135.55  
132.44  
128.82  
128.00

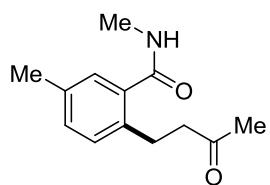

**3na** <sup>13</sup>C-NMR  
(125 MHz, CDCl<sub>3</sub>)

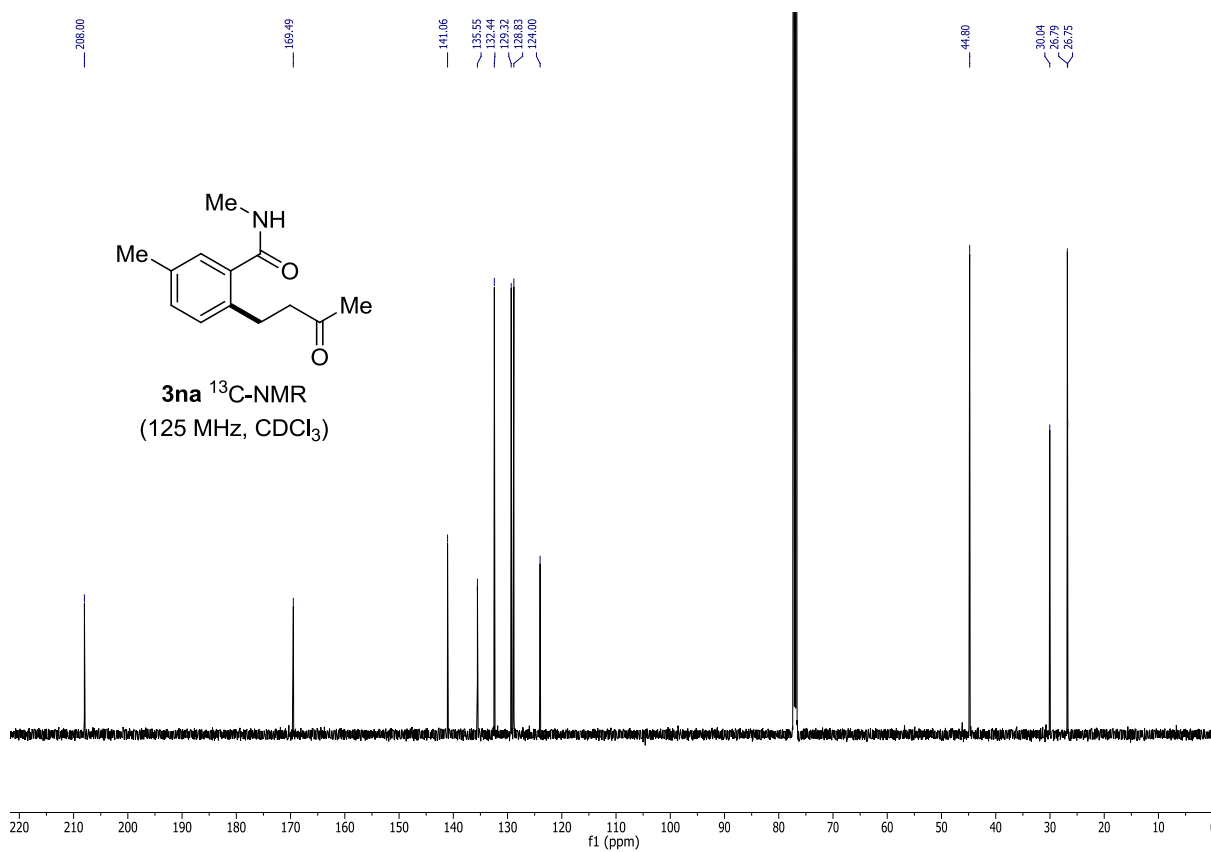



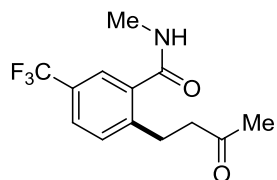

**3oa** <sup>1</sup>H-NMR  
(300 MHz, CDCl<sub>3</sub>)

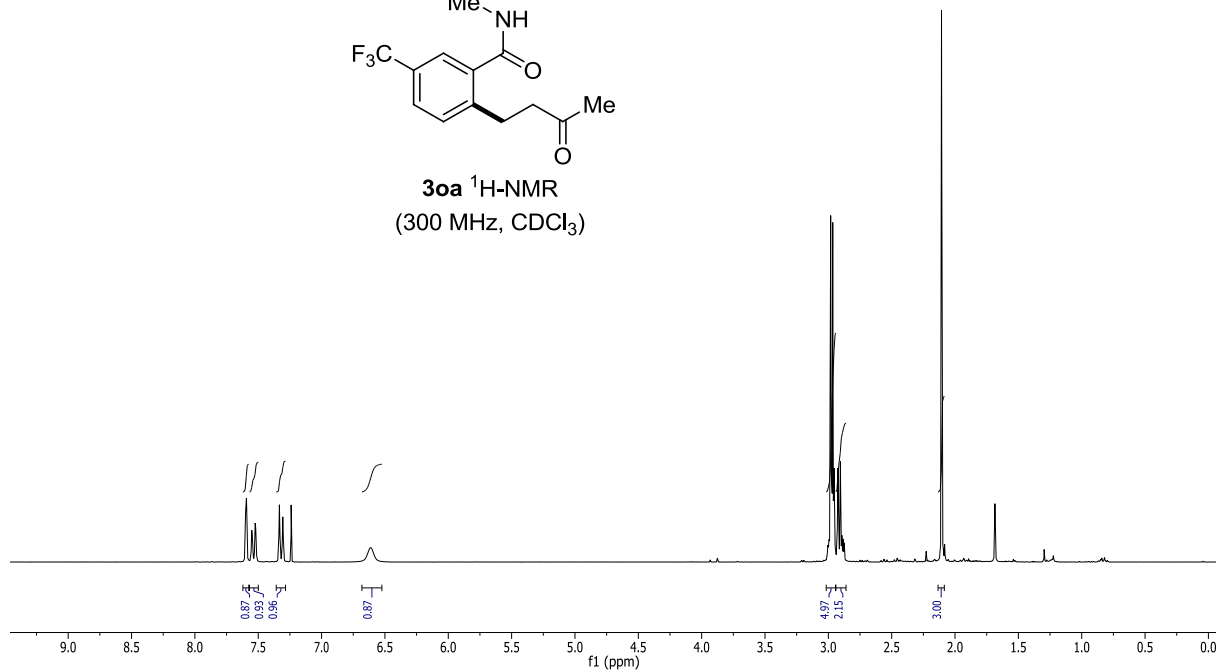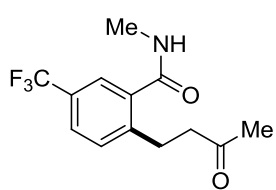

**3oa** <sup>13</sup>C-NMR  
(125 MHz, CDCl<sub>3</sub>)

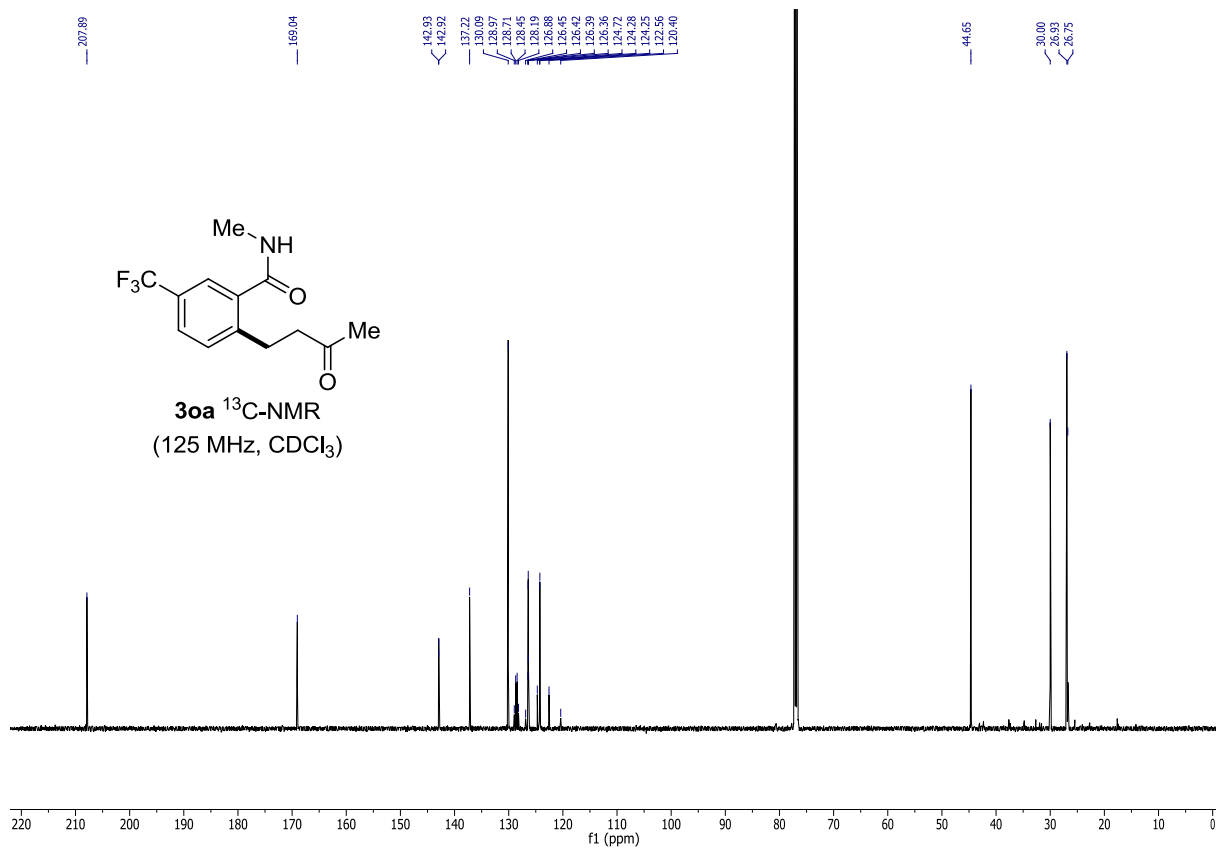

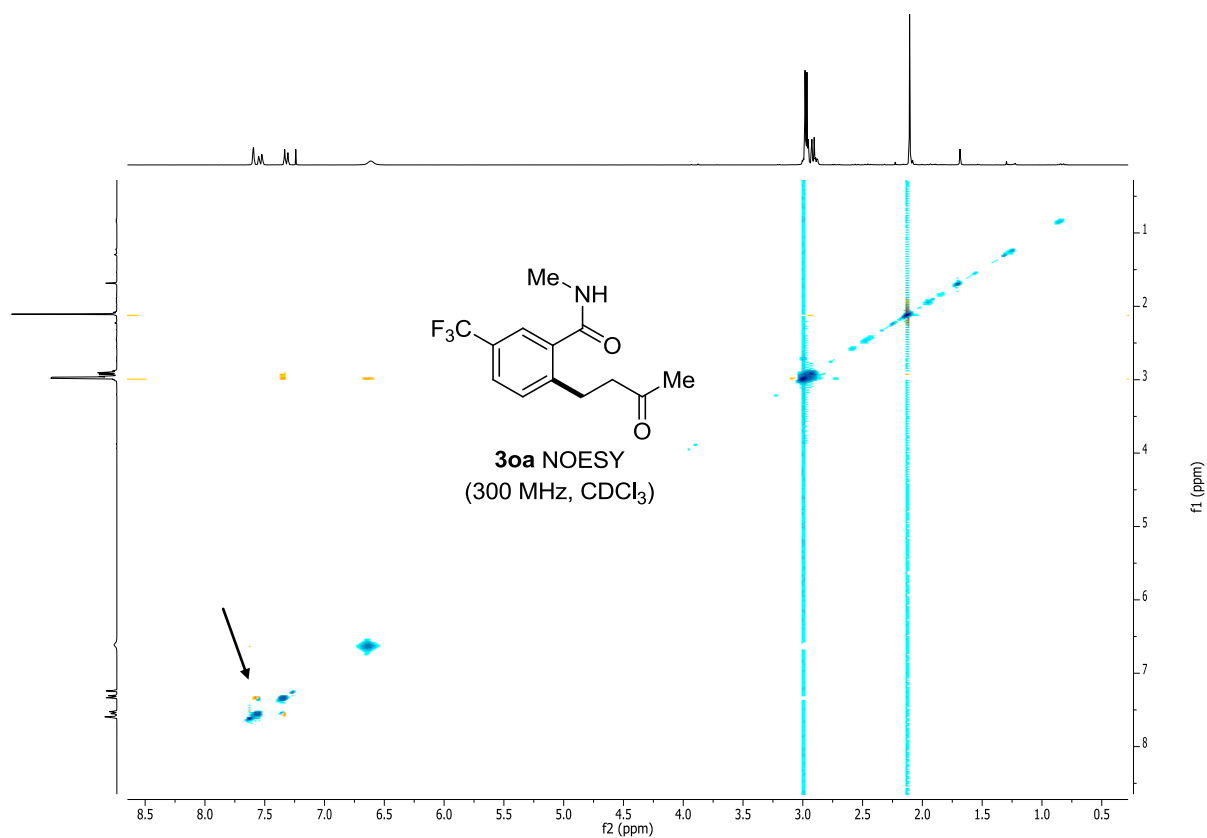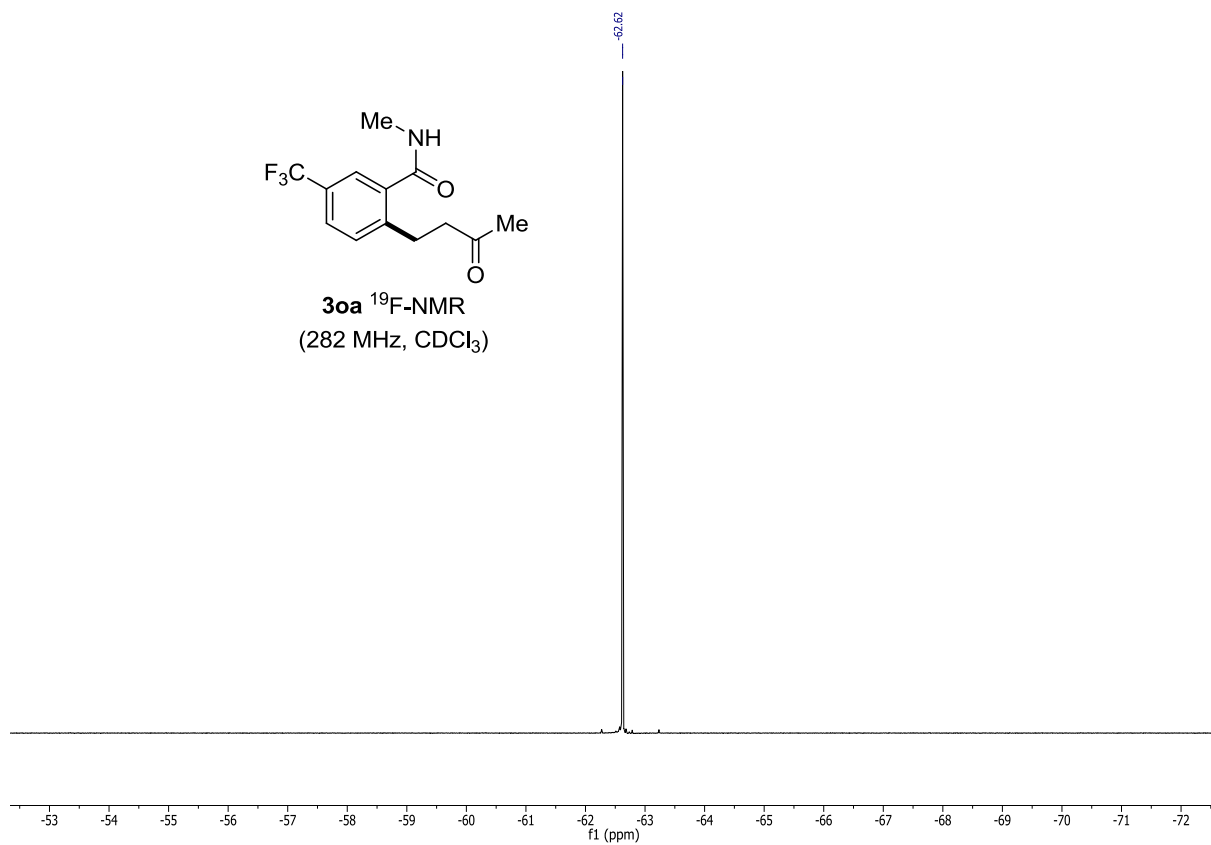

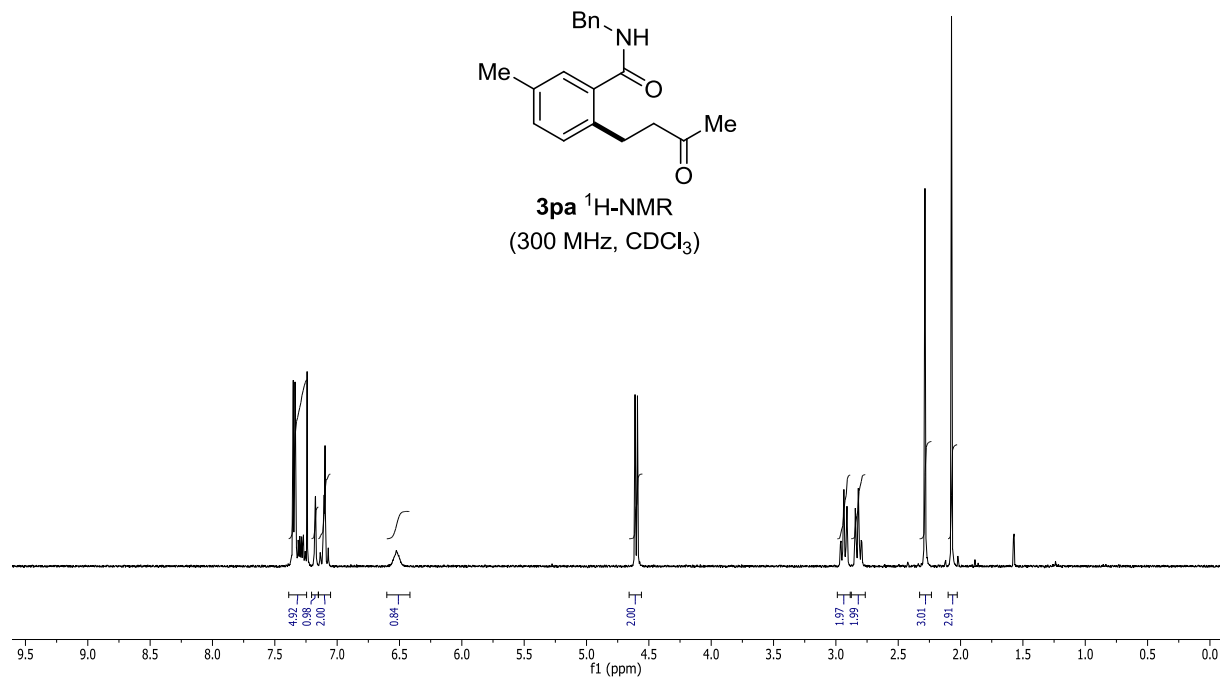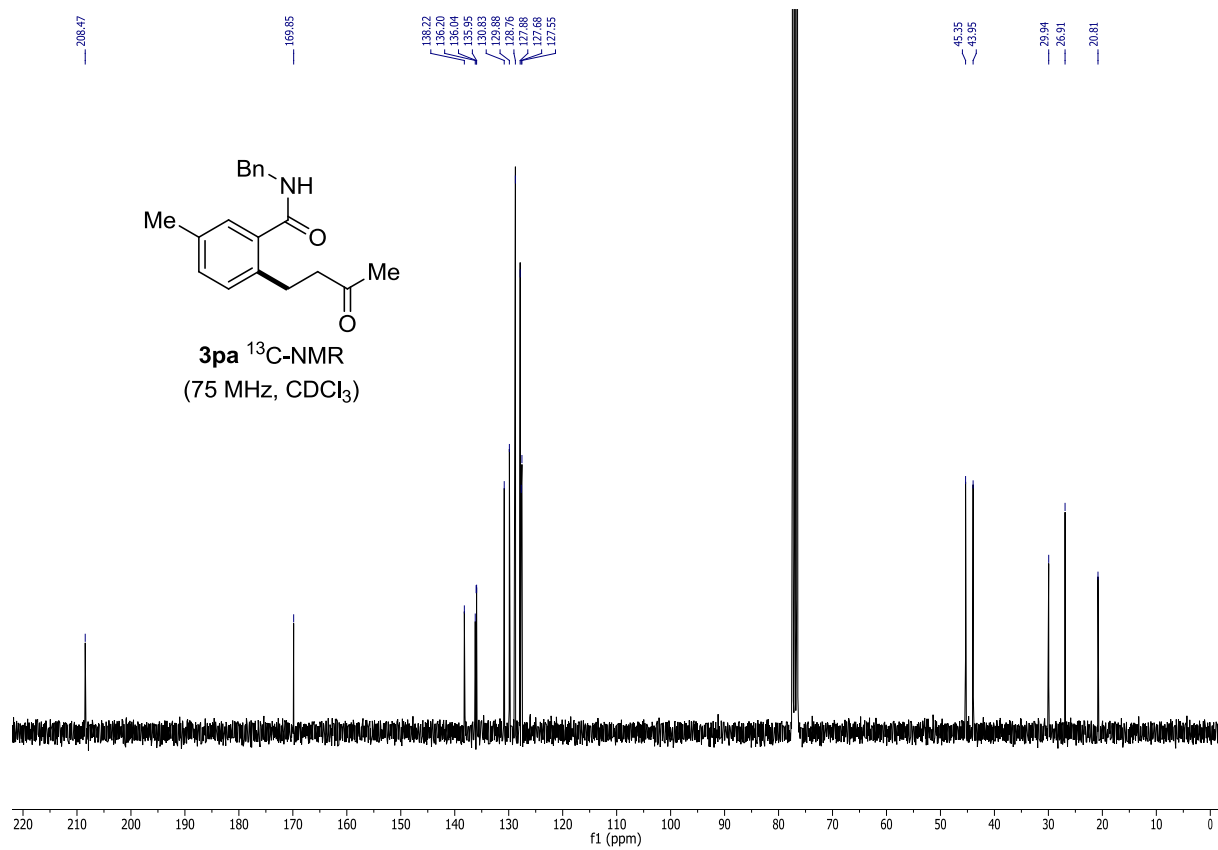

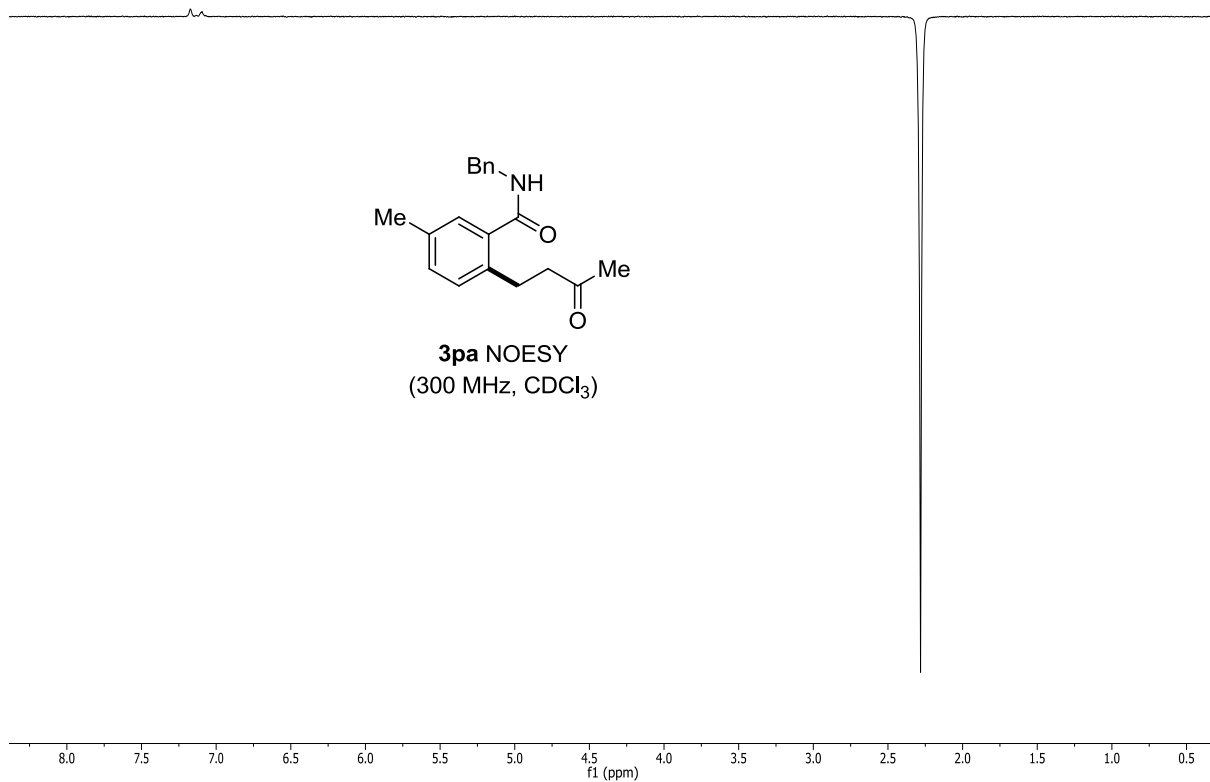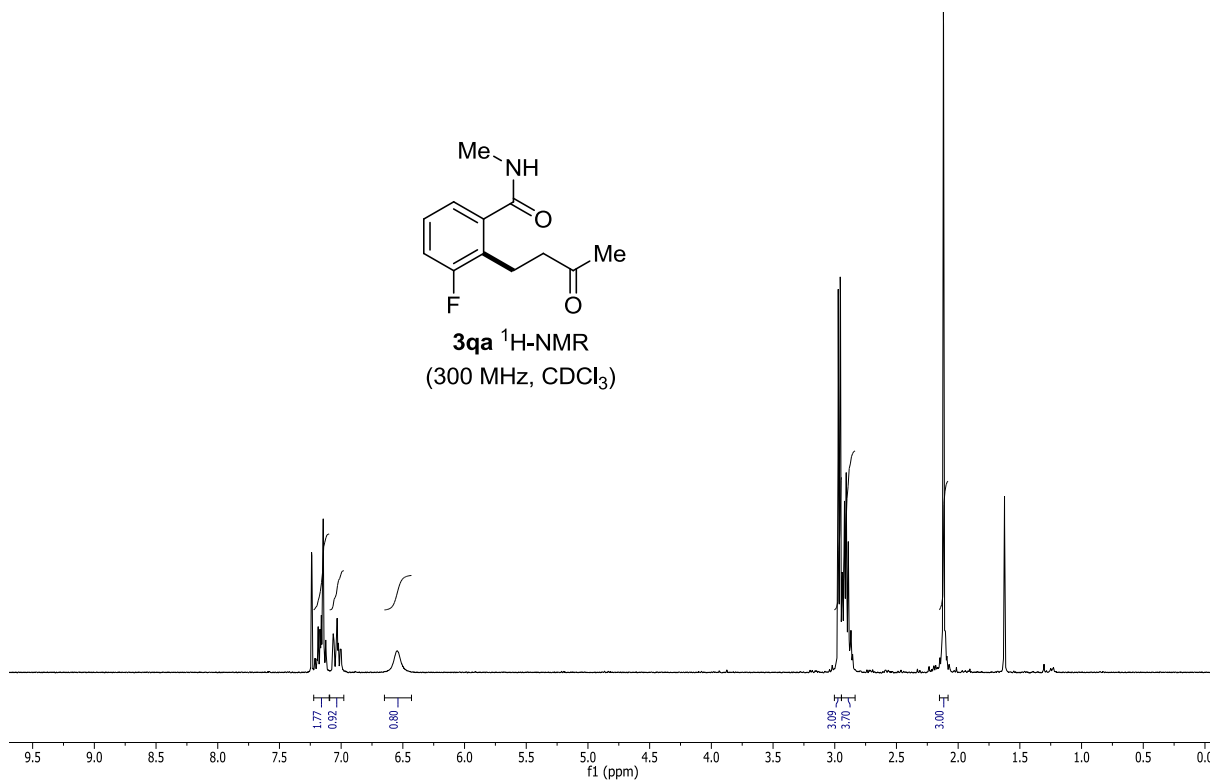

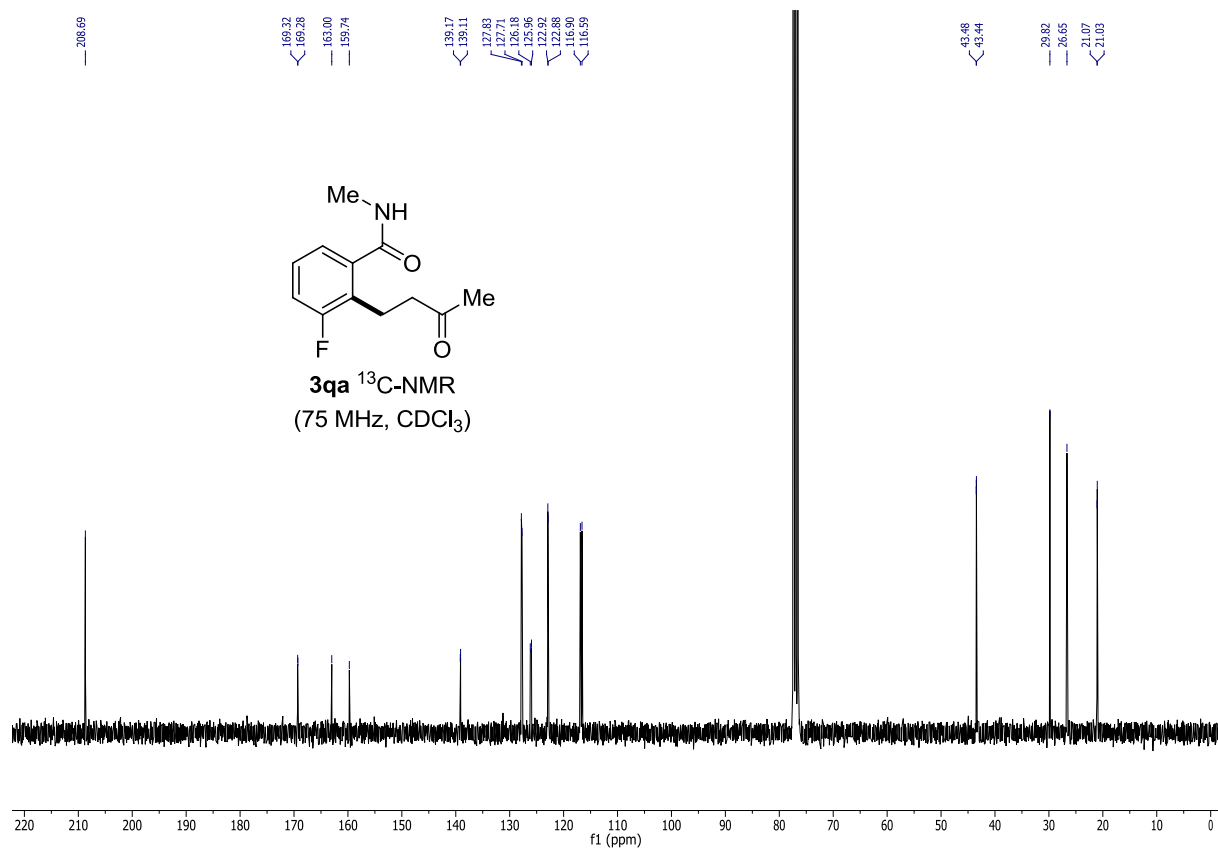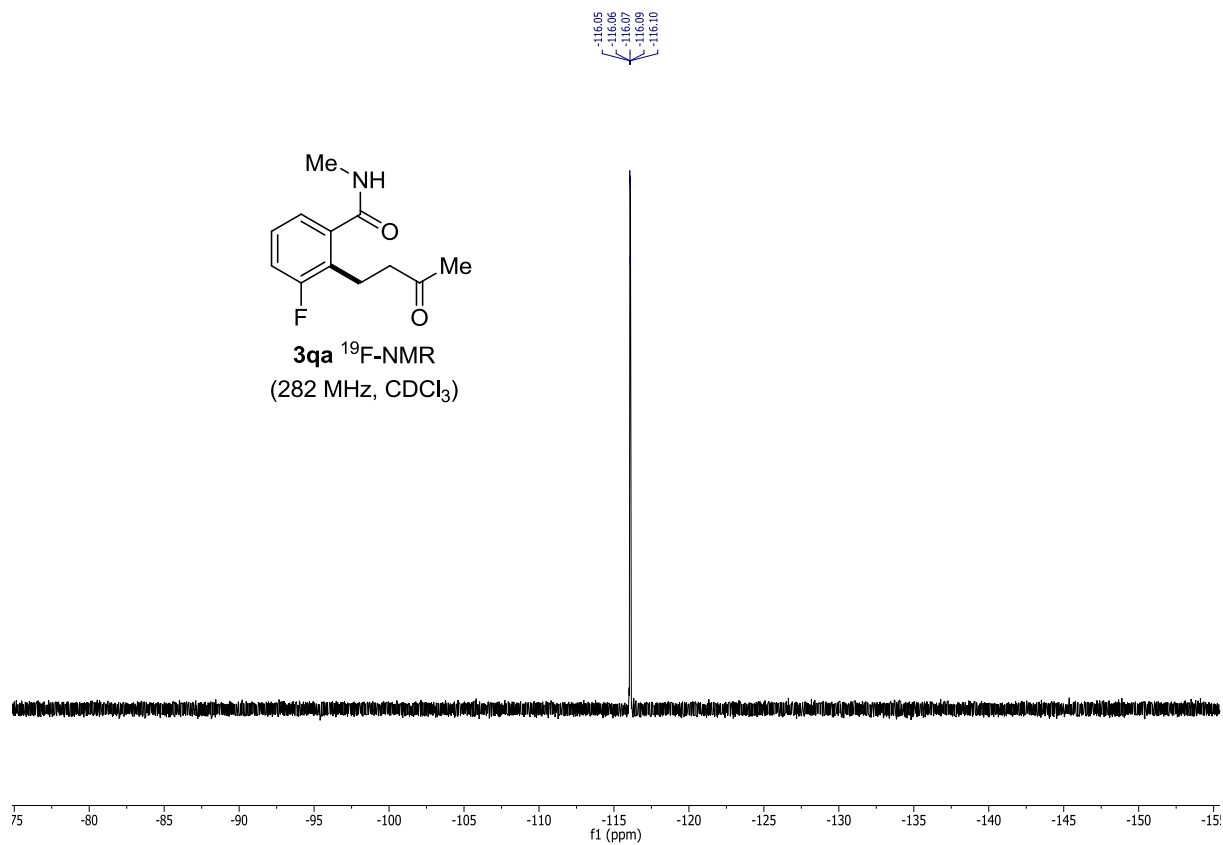

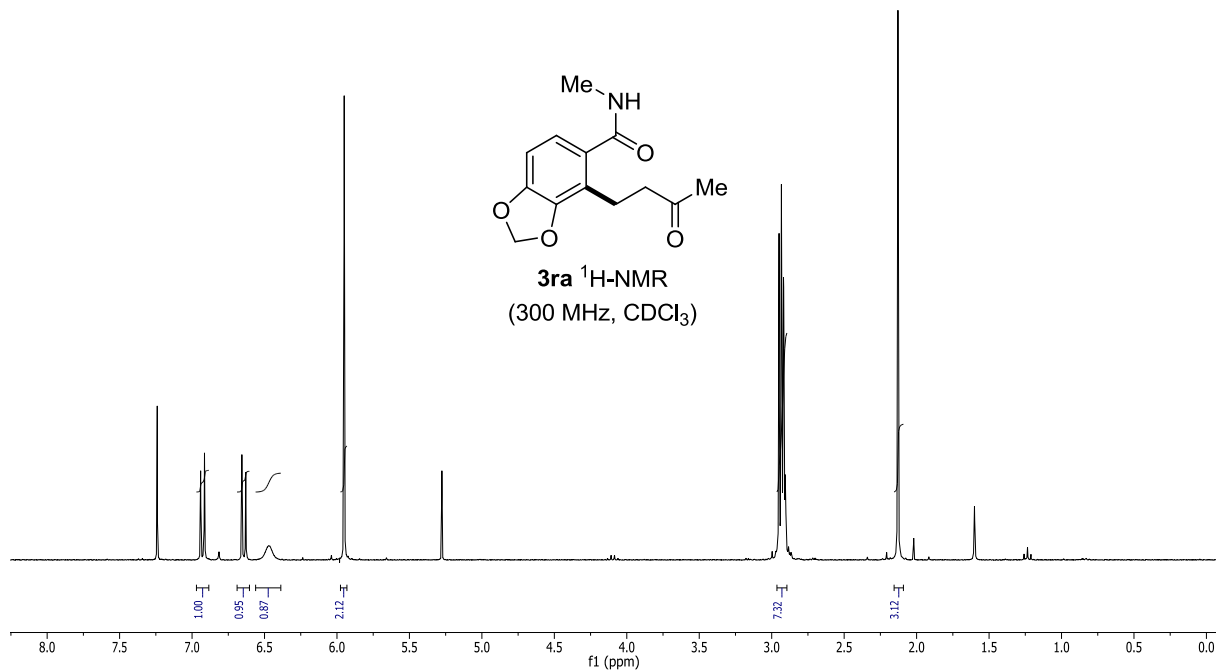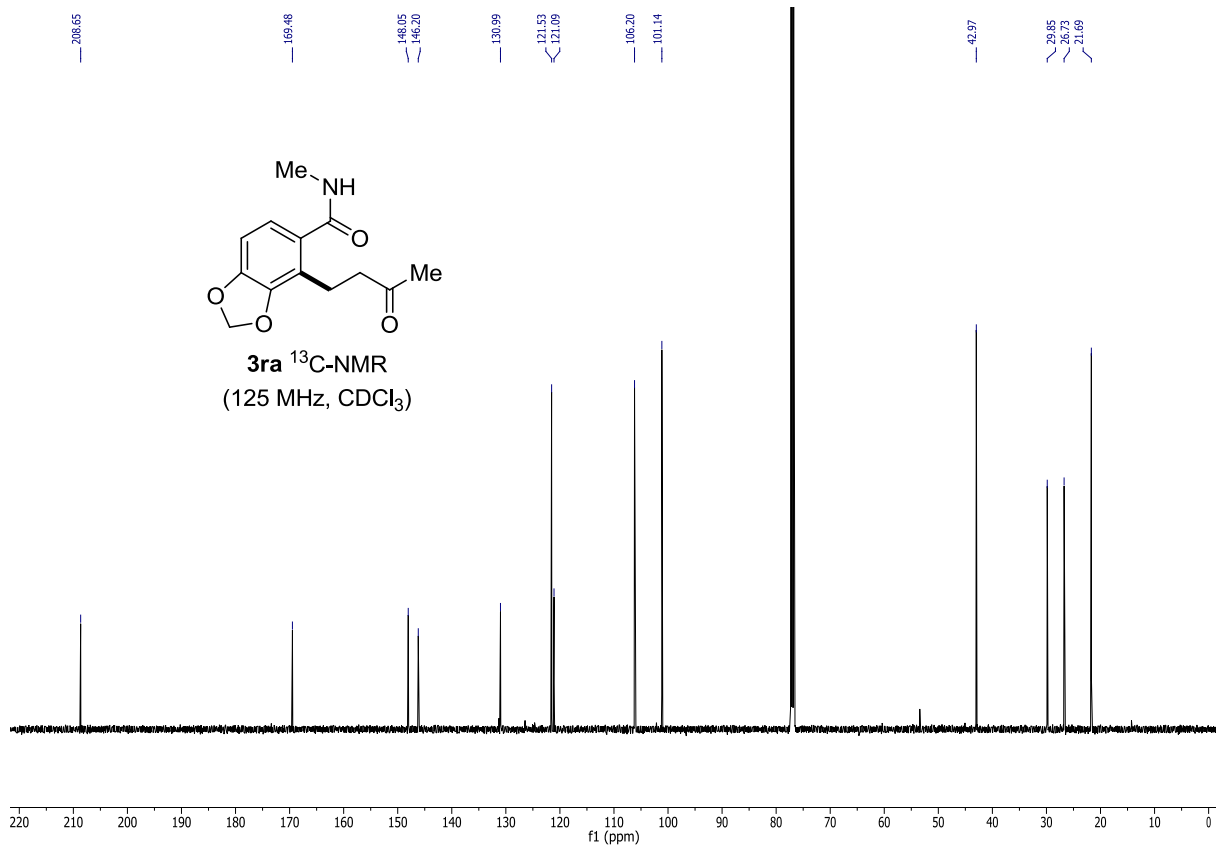

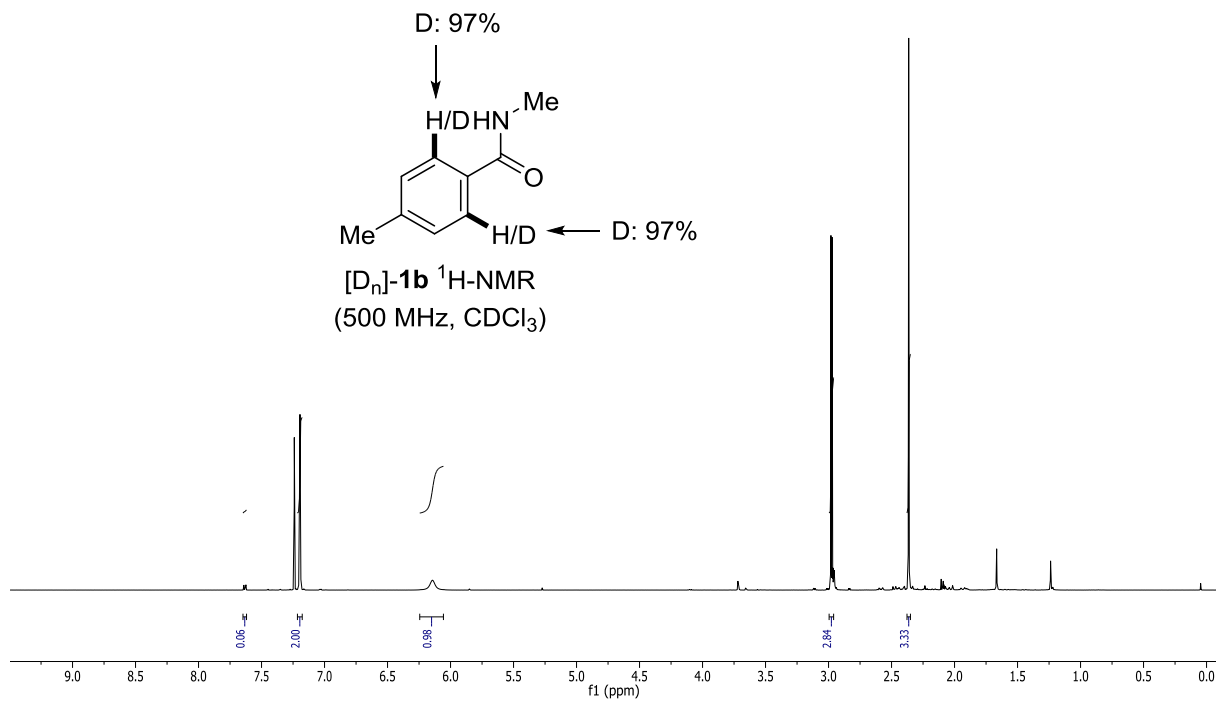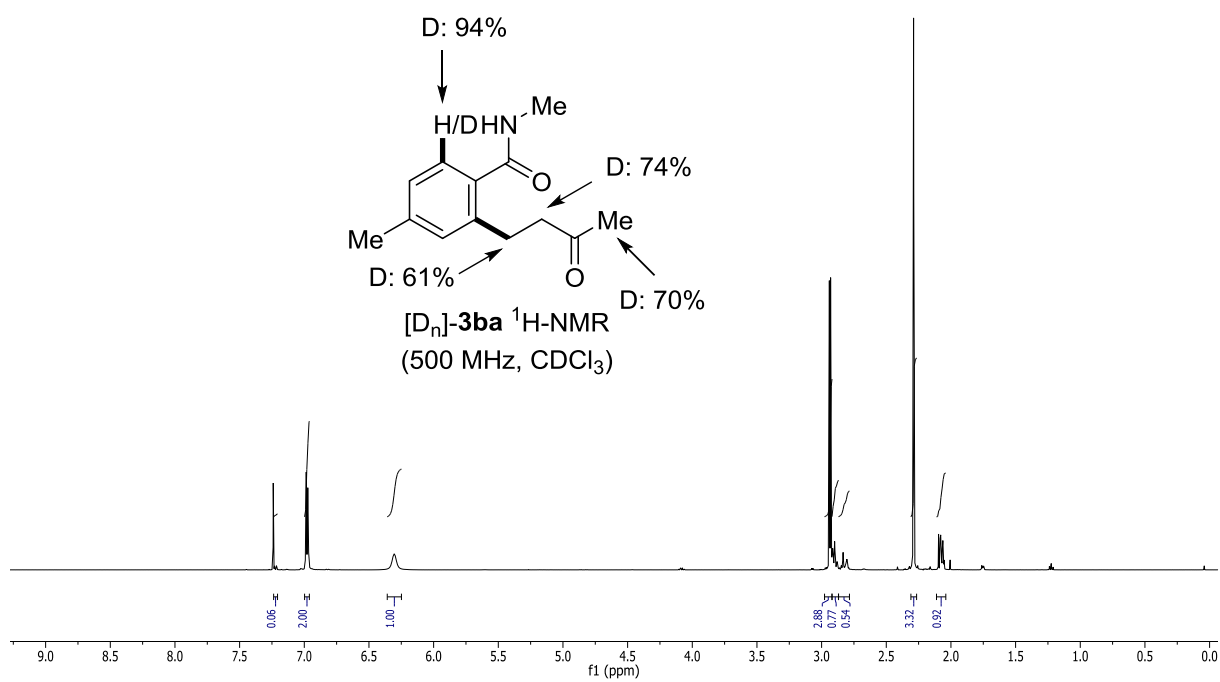

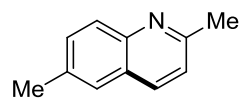

**6aa**  $^1\text{H-NMR}$   
(300 MHz,  $\text{CDCl}_3$ )

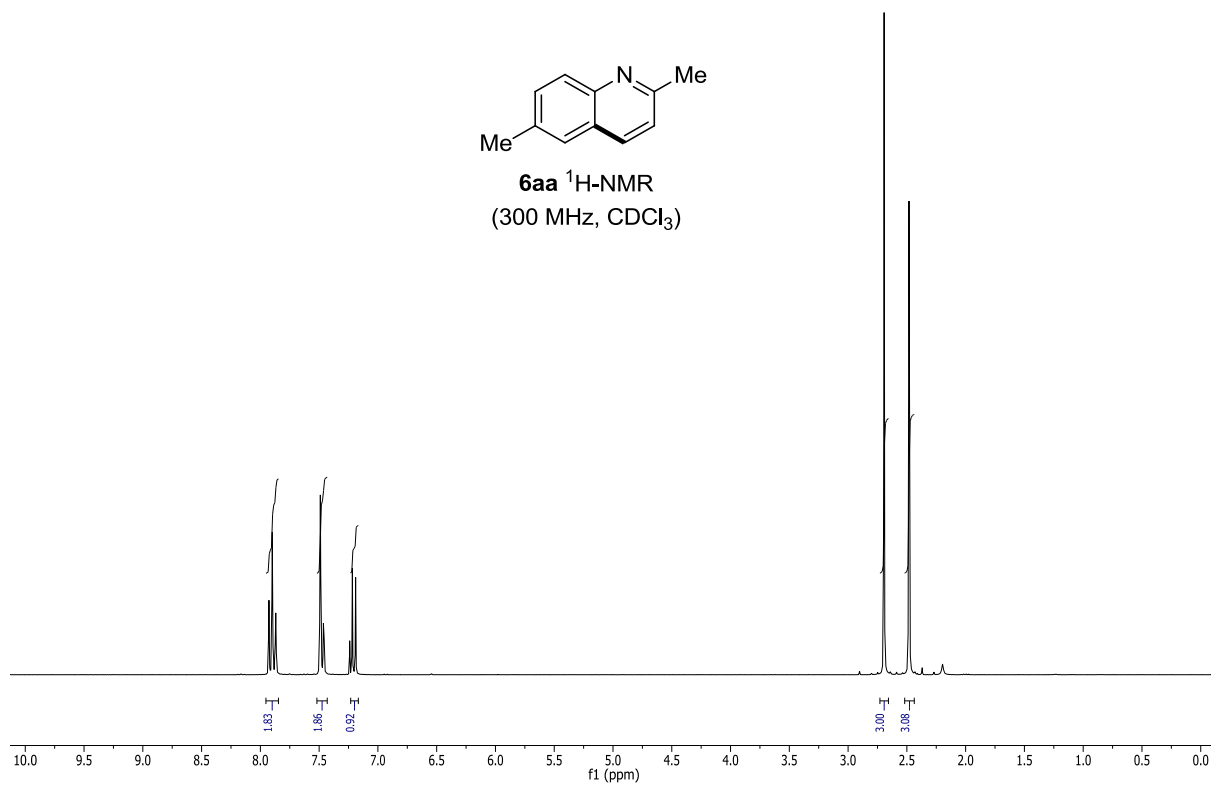

157.92  
146.37  
135.47  
135.30  
131.57  
128.24  
126.42  
126.32  
121.89  
25.22  
21.41

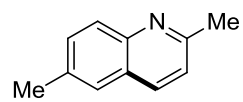

**6aa**  $^{13}\text{C-NMR}$   
(75 MHz,  $\text{CDCl}_3$ )

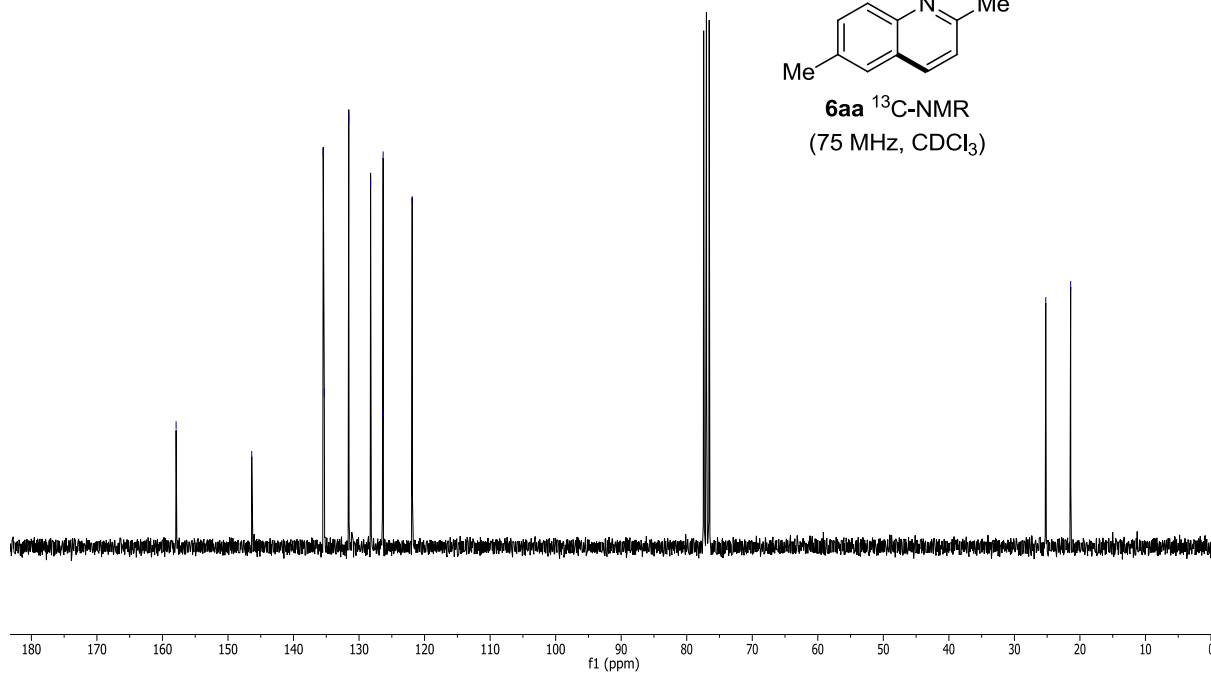



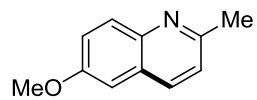

**6ba**  $^1\text{H-NMR}$   
(300 MHz,  $\text{CDCl}_3$ )

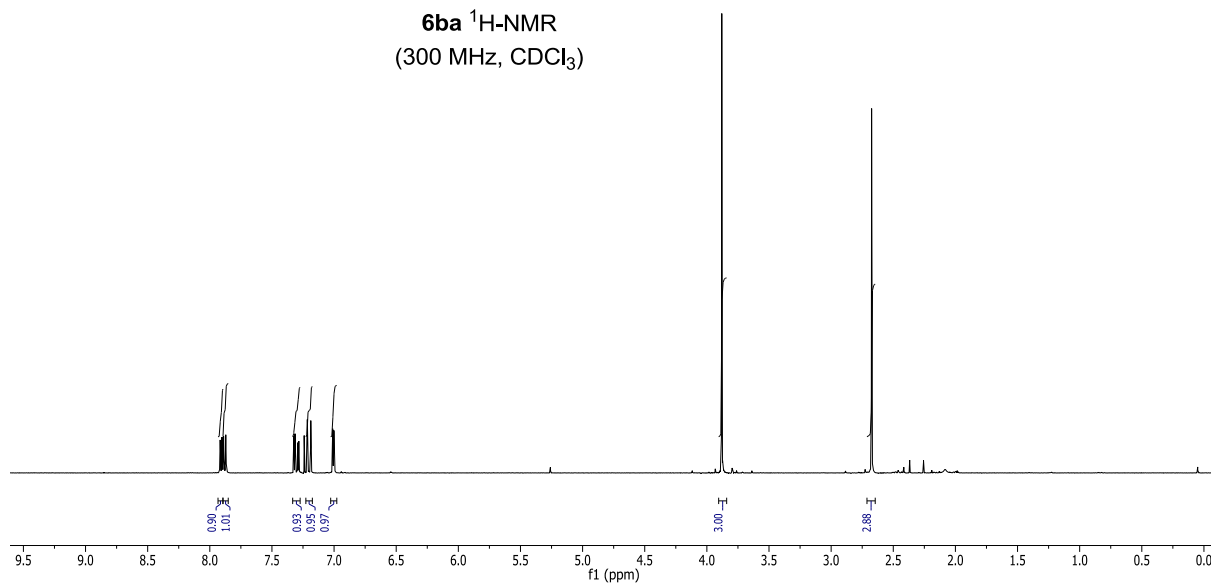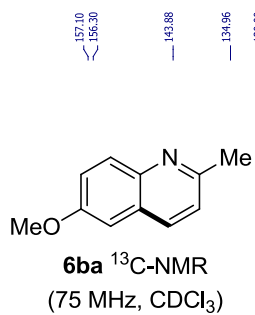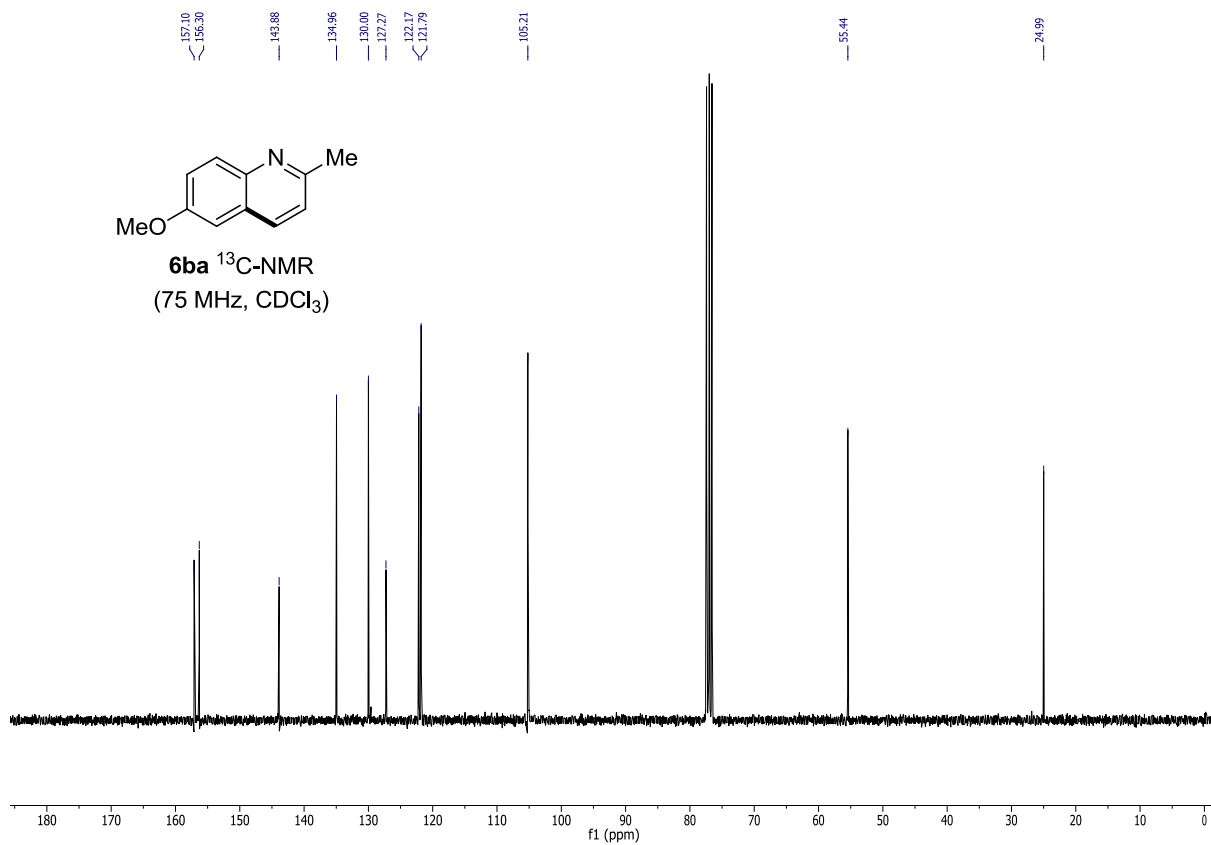

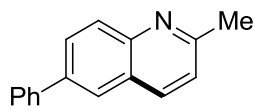

**6ca**  $^1\text{H-NMR}$   
(300 MHz,  $\text{CDCl}_3$ )

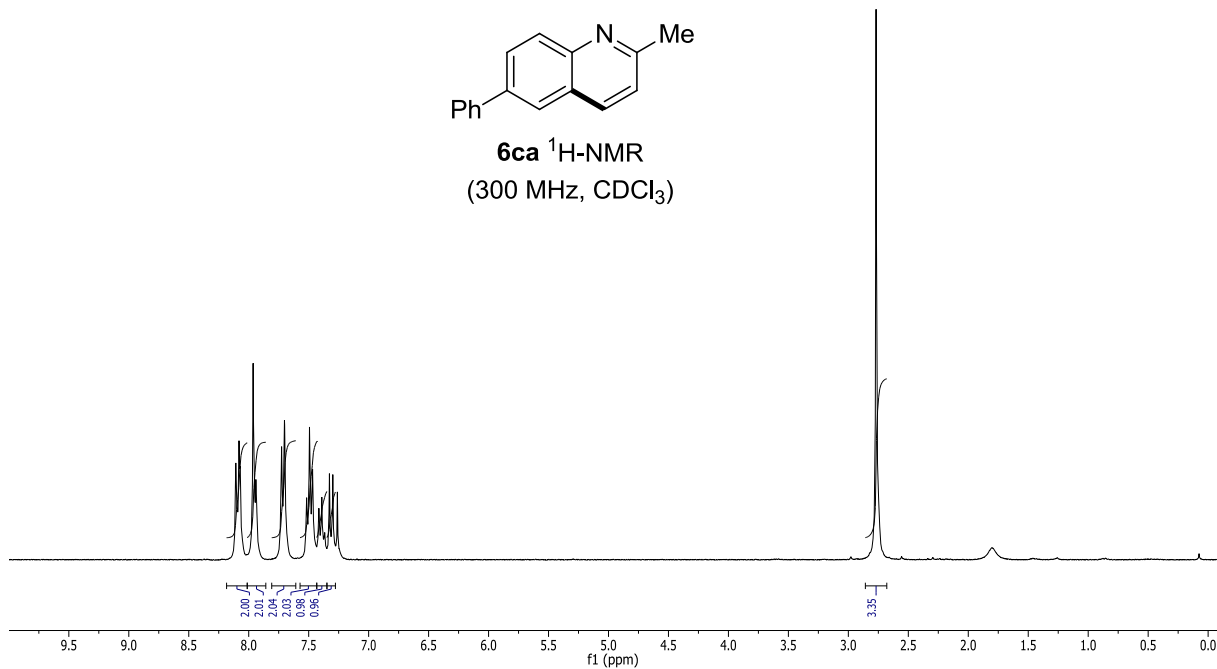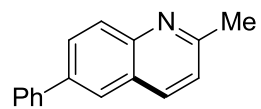

**6ca**  $^{13}\text{C-NMR}$   
(75 MHz,  $\text{CDCl}_3$ )

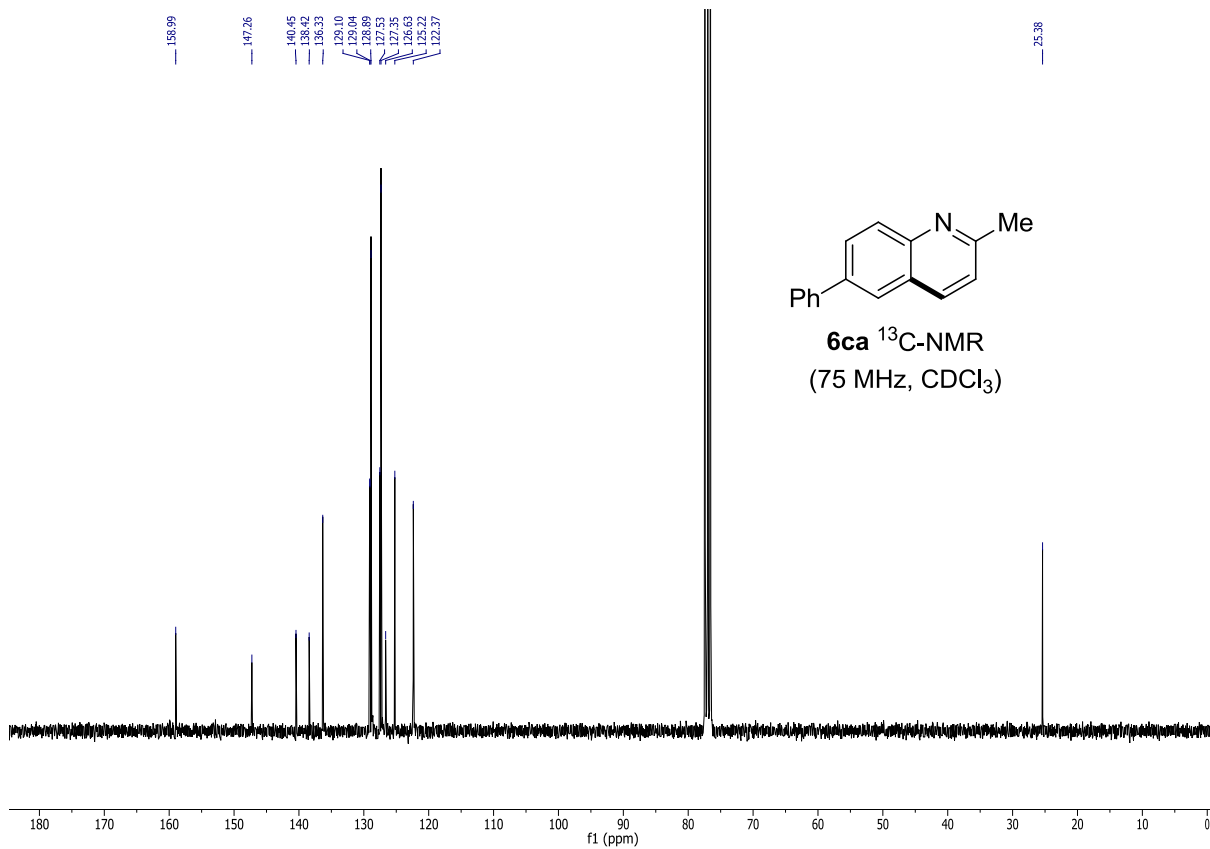

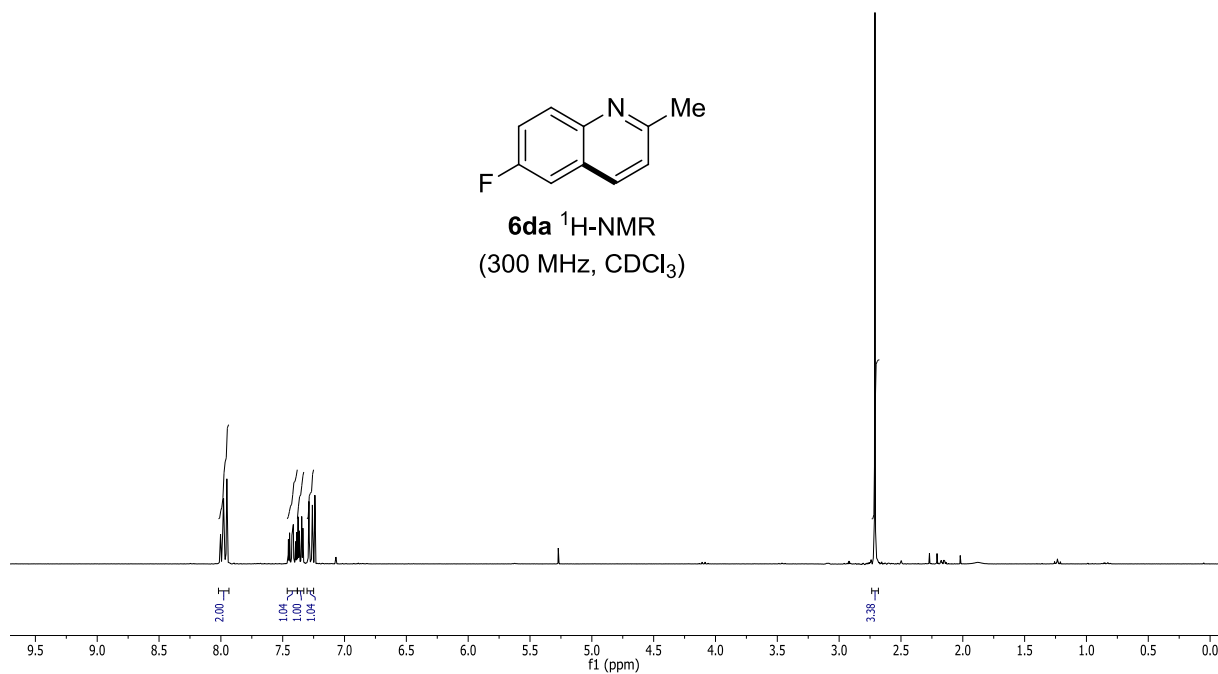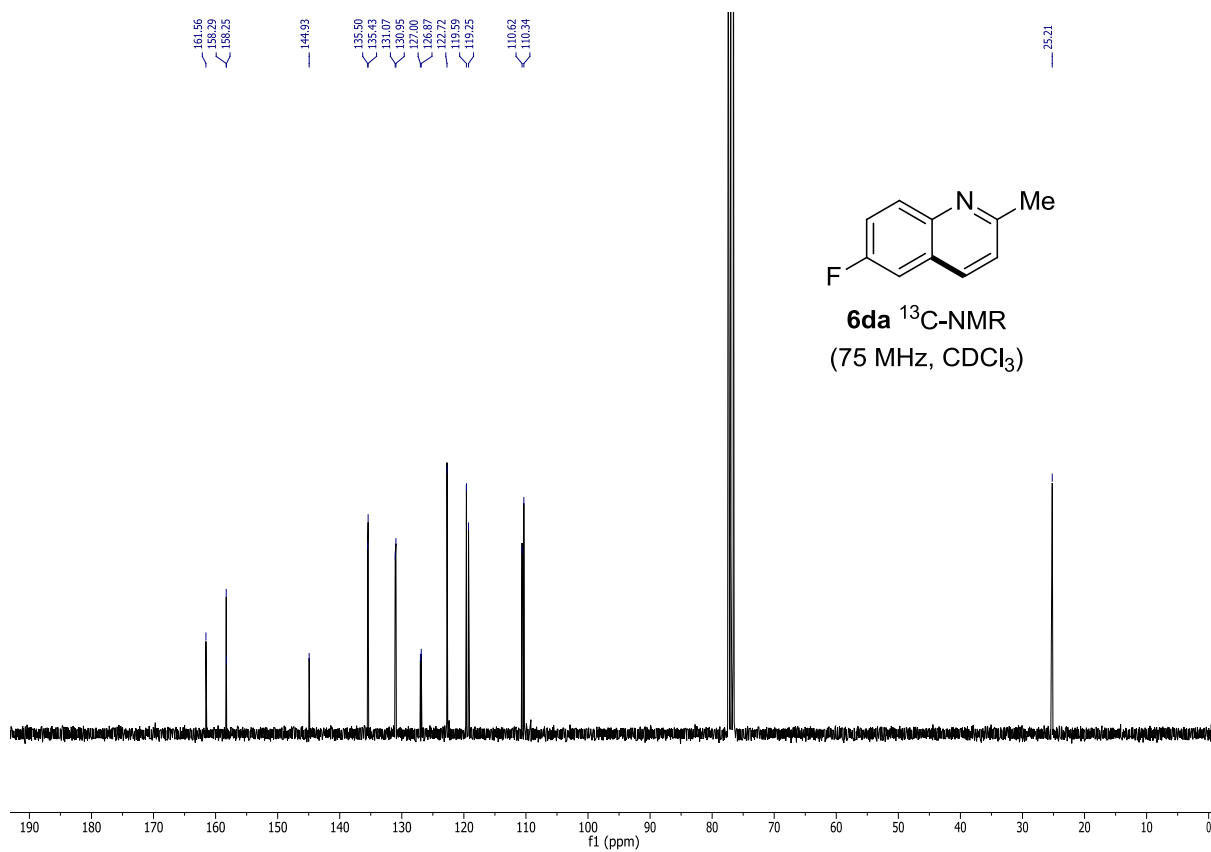

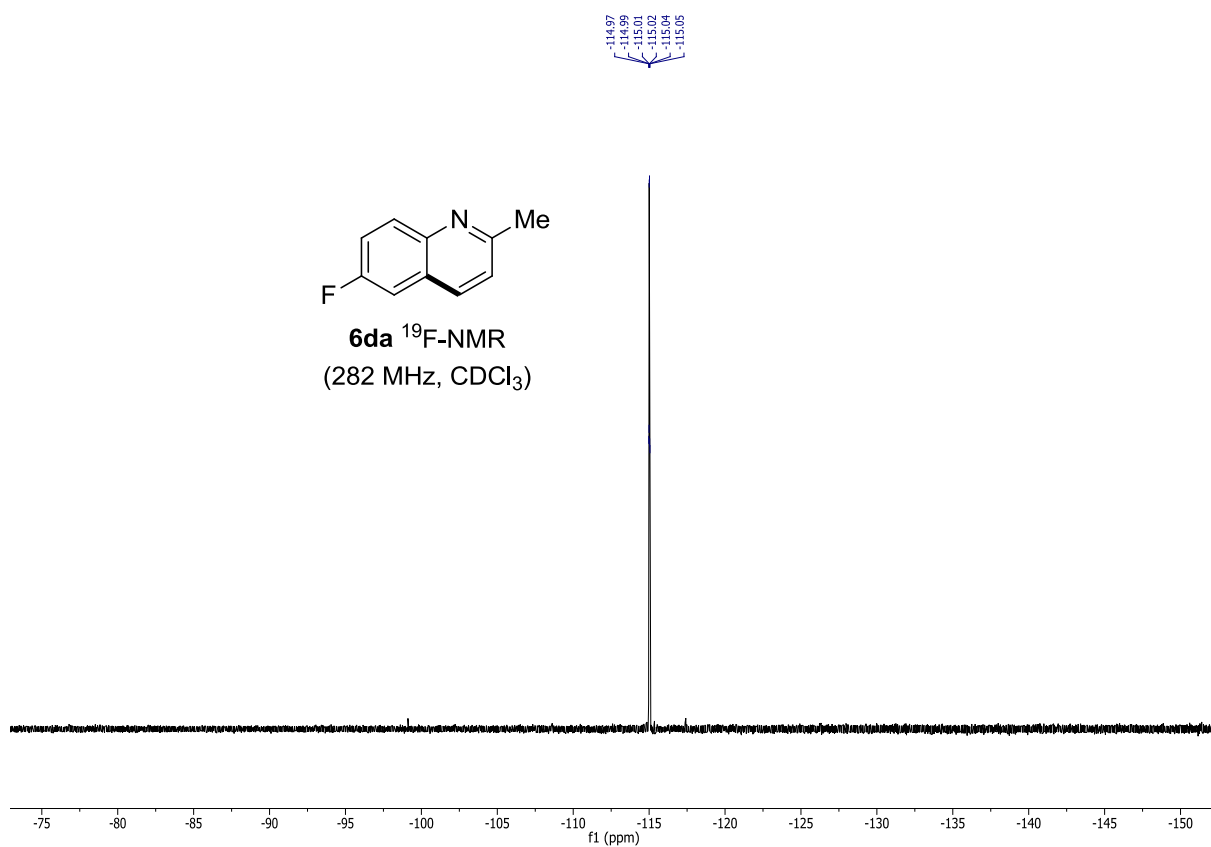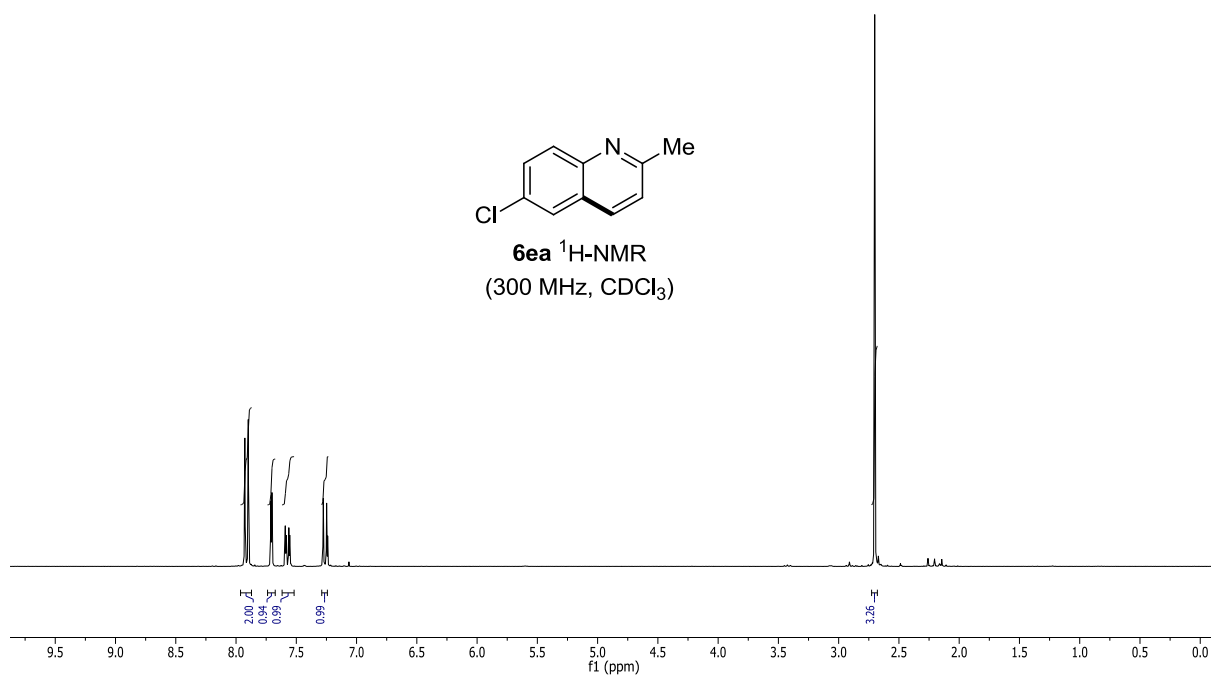

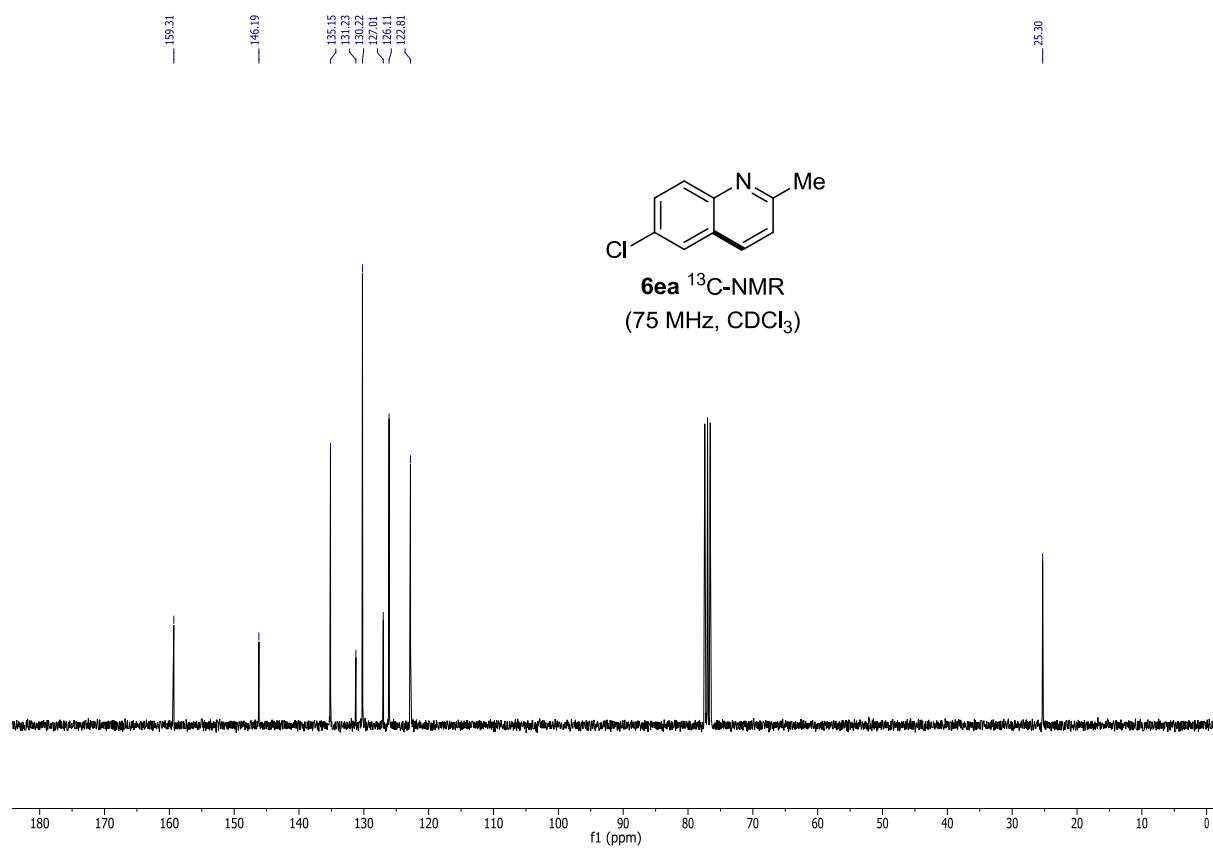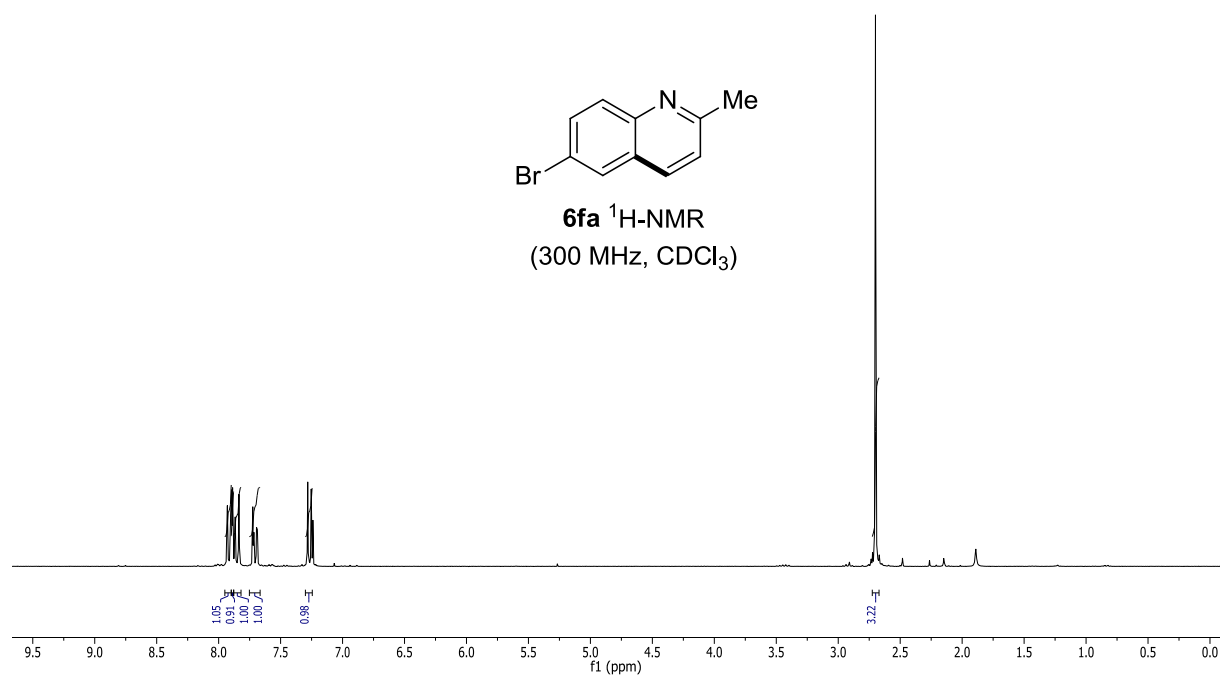

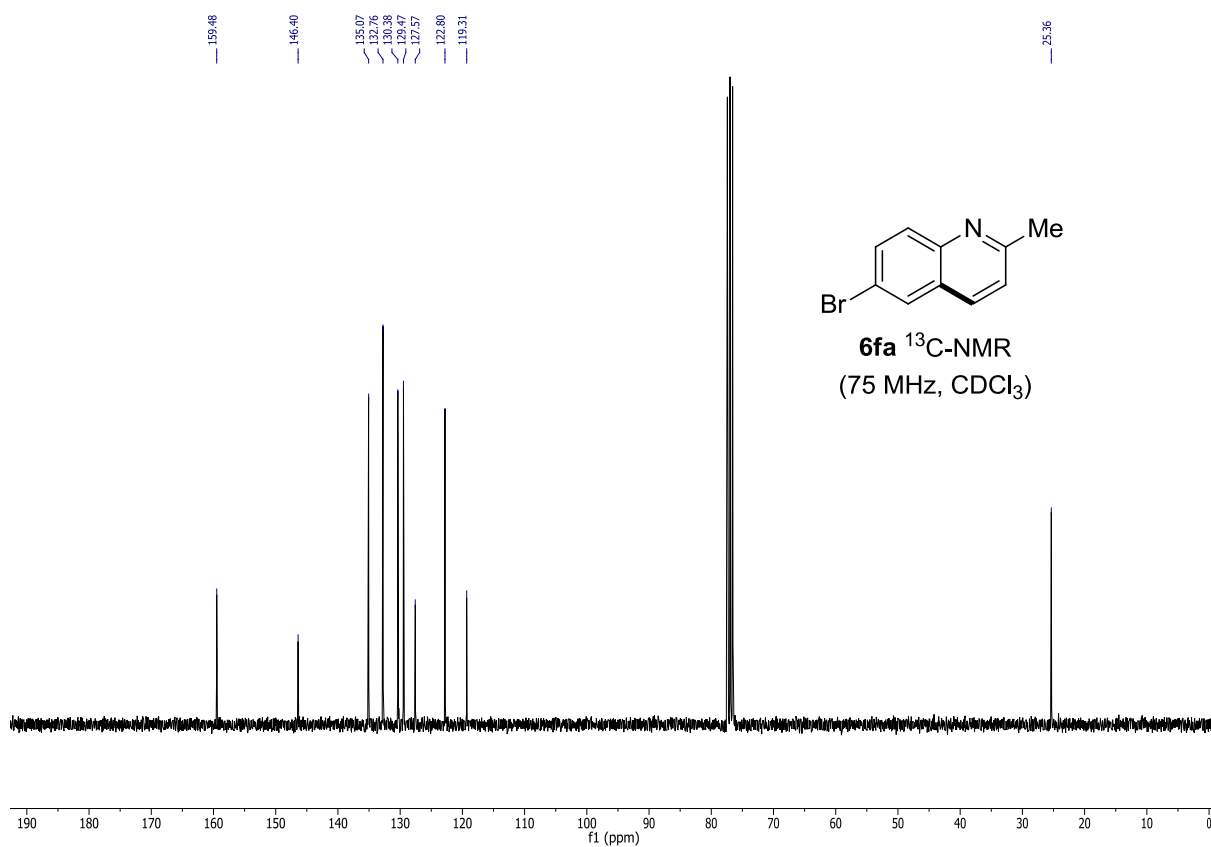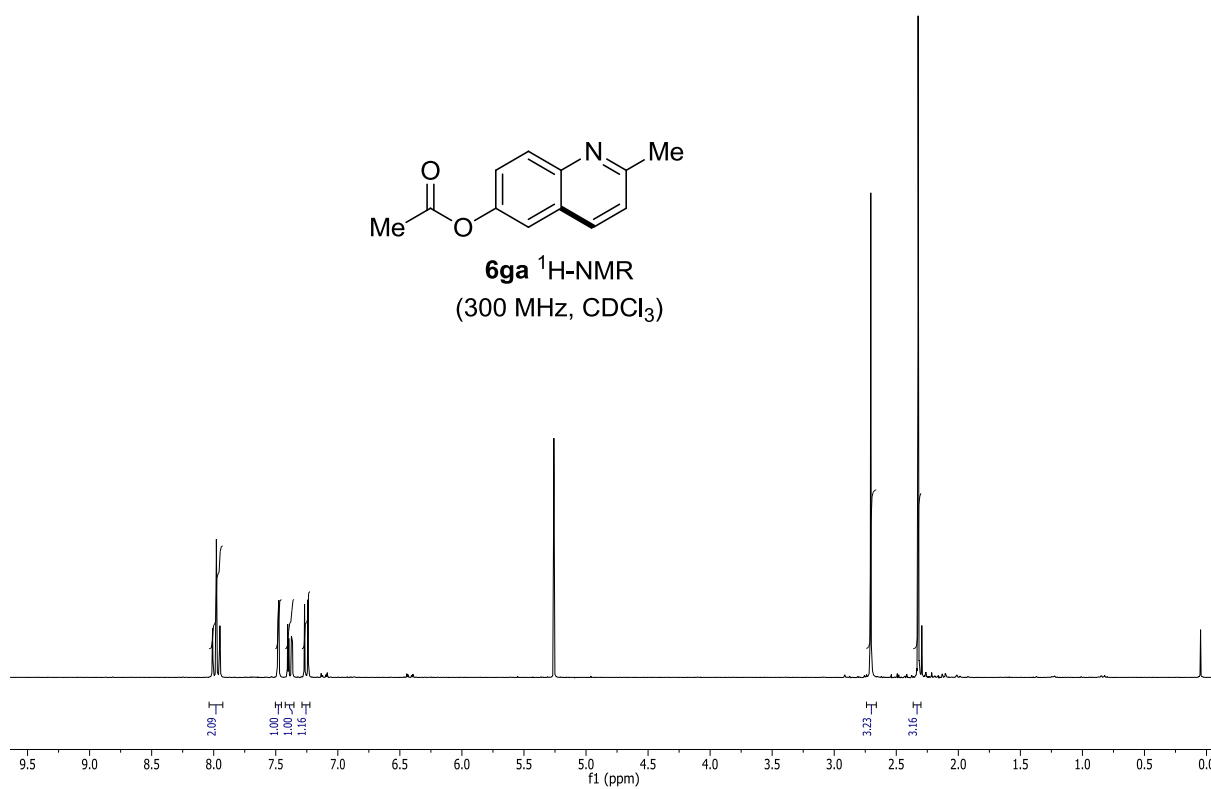

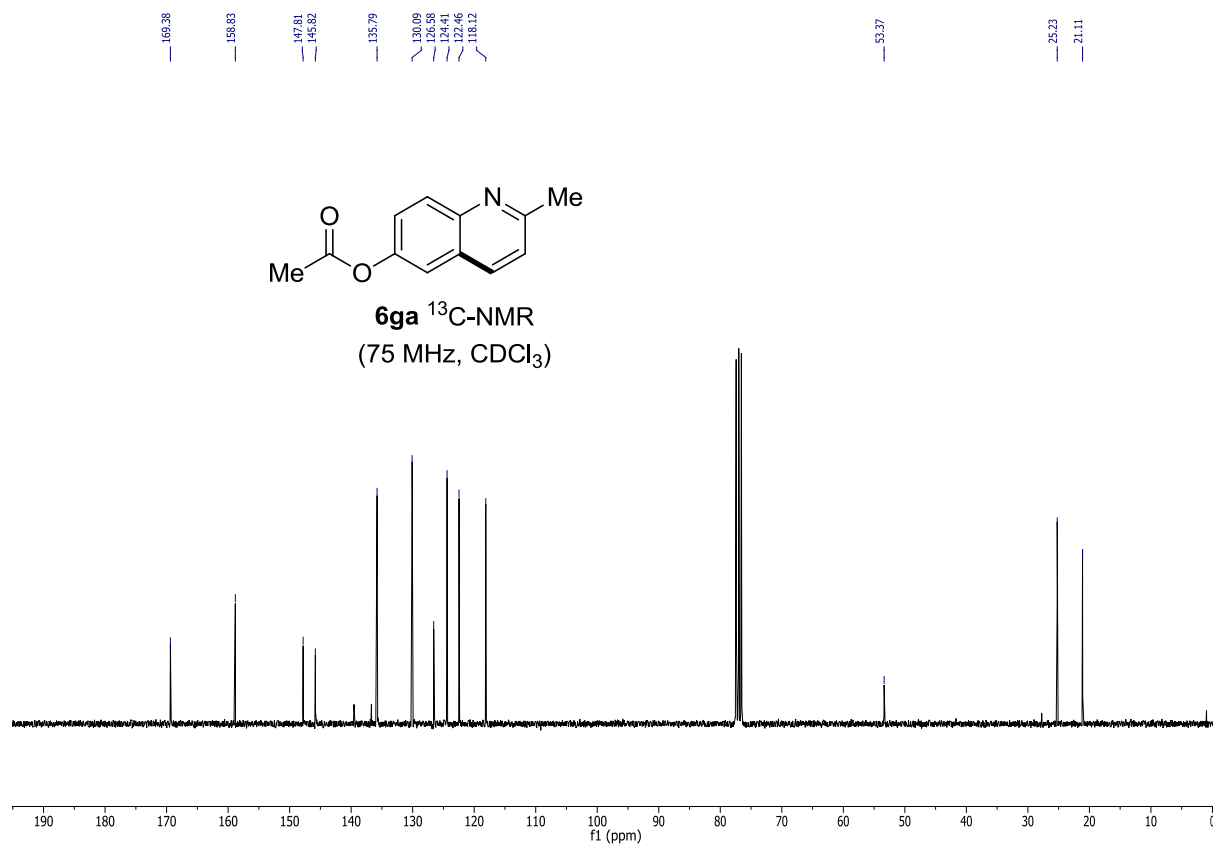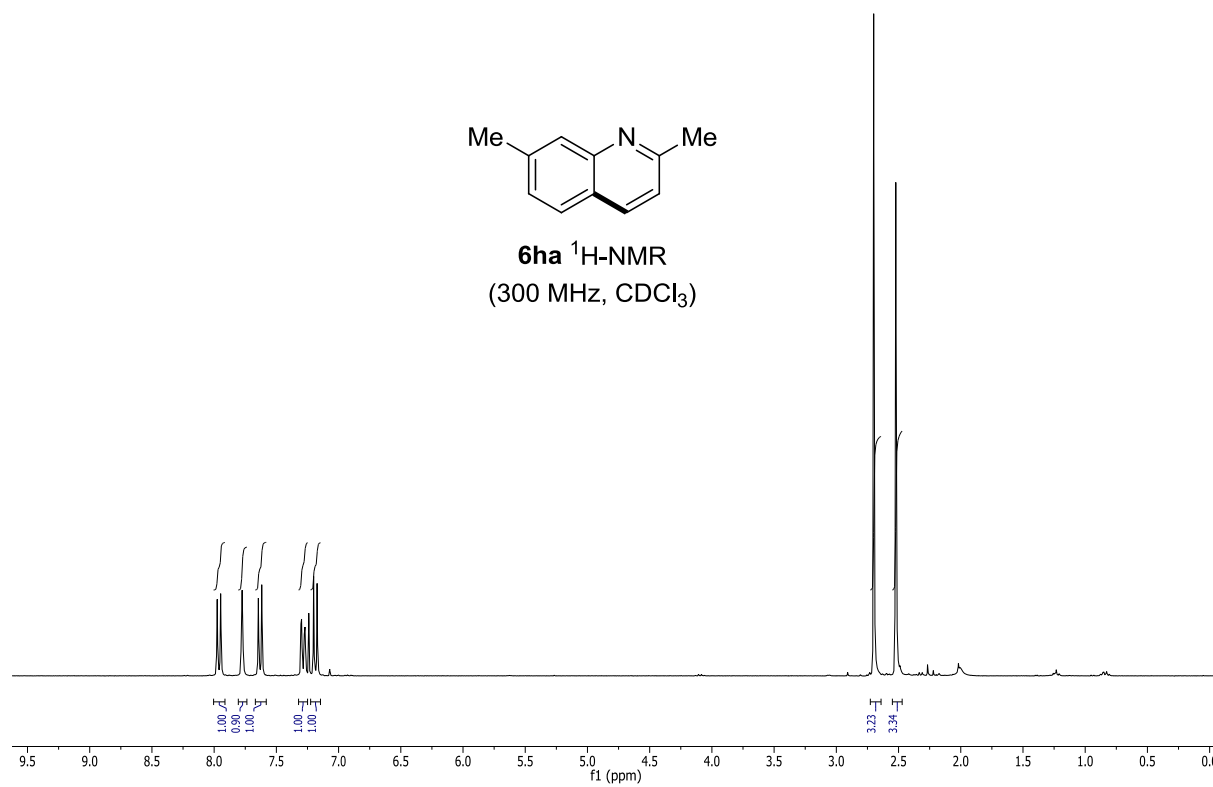

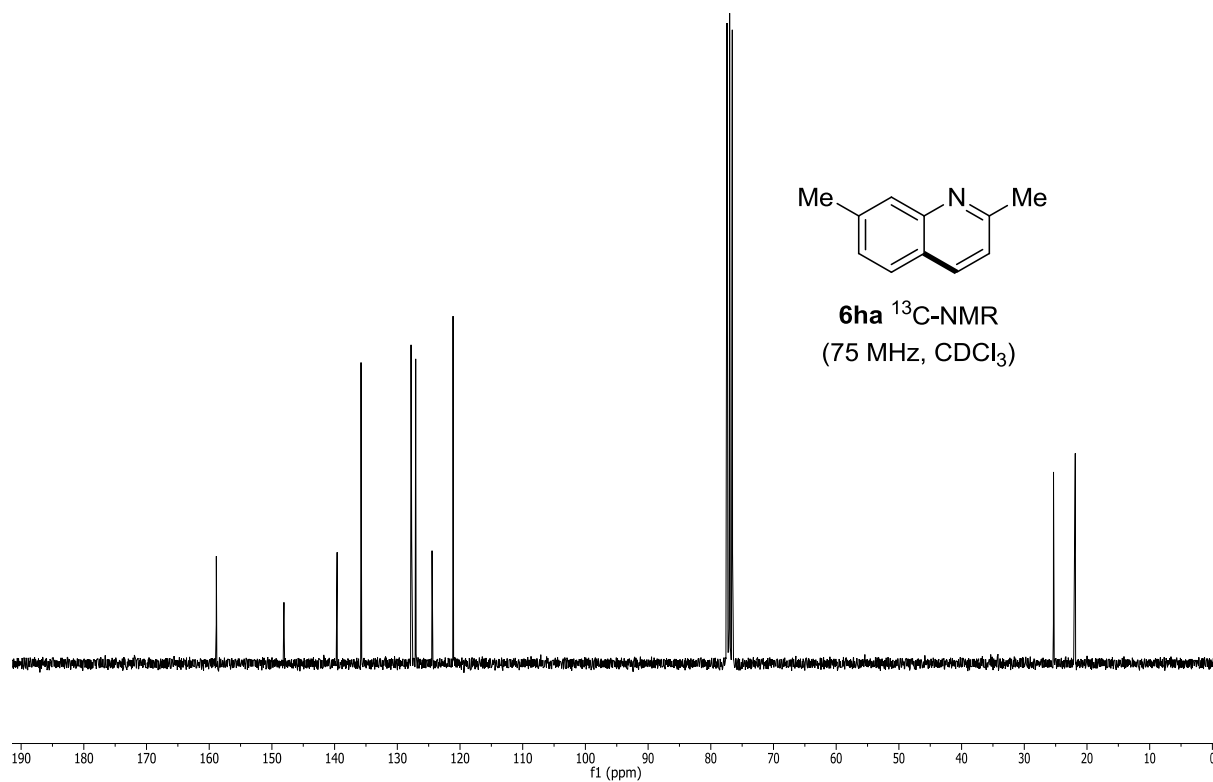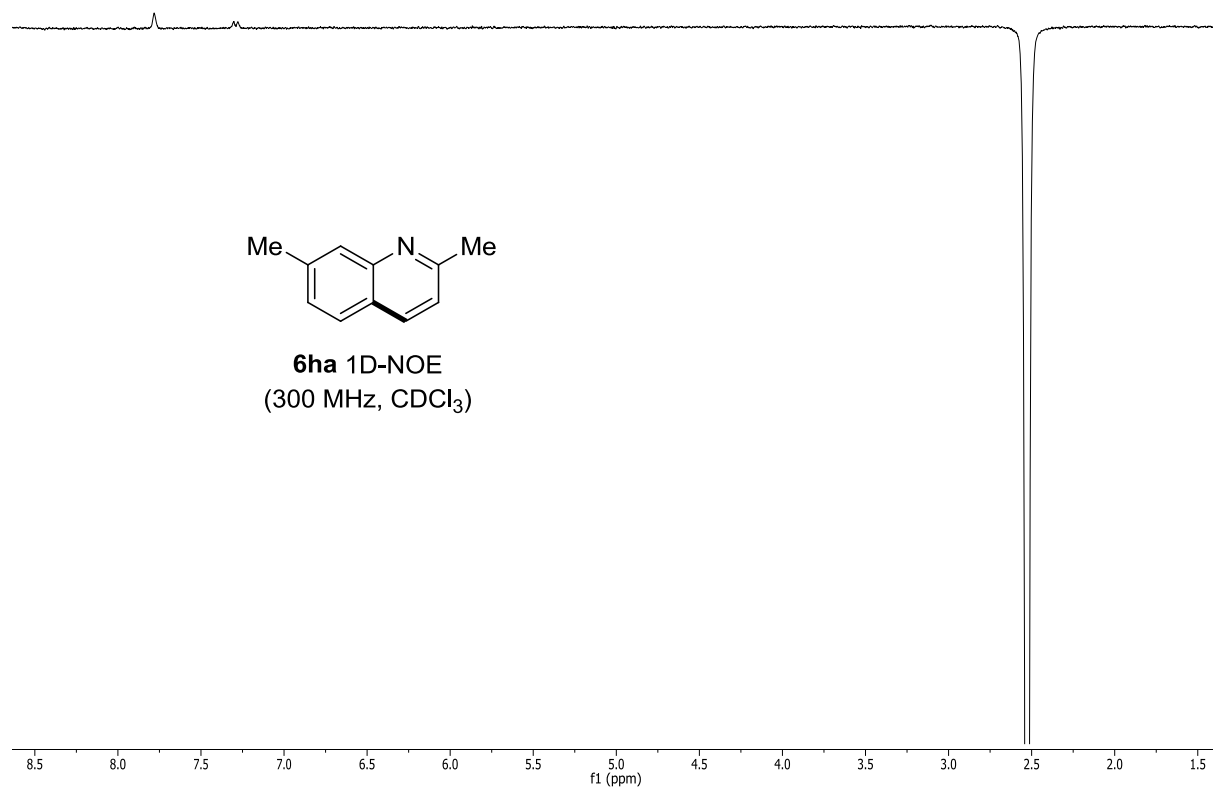

Supplement: c5qo00167f1.pdf [file c5qo00167f1.pdf]
